# Supplementary material for: FUS/TLS deficiency causes behavioral and pathological abnormalities distinct from amyotrophic lateral sclerosis
Source: PubMed Central journal article supplement (PMC4408580; doi:10.1186/s40478-015-0202-6), 2015-04-25
Supplement: 40478_2015_202_MOESM1_ESM.pdf [file 40478_2015_202_MOESM1_ESM.pdf]

## **Additional file 1 : Acta Neuropathologica Communications**

### **FUS/TLS deficiency causes behavioral and pathological abnormalities distinct from amyotrophic lateral sclerosis**

Yoshihiro Kino, Chika Washizu, Masaru Kurosawa, Mizuki Yamada, Haruko Miyazaki, Takumi Akagi, Tsutomu Hashikawa, Hiroshi Doi, Toru Takumi, Geoffrey Hicks, Nobutaka Hattori, Tomomi Shimogori, and Nobuyuki Nukina.

## **Contents of Additional file 1:**

- **Supplemental Materials and Methods**

- **Supplemental References**

- **Supplemental Figures**

**Figure S1** (related to Figure 1): Analysis of tremor-like movement of mice

**Figure S2** (related to Figure 2): Behavioral analysis of FUS/TLS knockout mice

**Figure S3** (related to Figures 3 and 4): Histological analysis of FUS/TLS knockout mice

**Figure S4** (related to Figure 4): Transcriptome analysis of FUS/TLS knockout mice

**Figure S5** (related to Figure 4): Experimental validation of RNA analysis

- **Supplemental Tables (separate EXCEL files)**

**Additional file 2: Table S1.** Gene expression analysis of FUS/TLS-deficient mice

**Additional file 3: Table S2.** RNA processing analysis of FUS/TLS-deficient mice

**Additional file 4: Table S3.** Summary of validated RNA processing alterations in the TLS KO striatum

**Additional file 5: Table S4.** Transcriptome changes found in both this study and Lagier-Tourenne et al.

## Supplemental Materials and Methods

### cDNA clones and constructs

For making RNAi constructs, oligonucleotides corresponding to an artificial microRNA were inserted into the Esp3I site of R-miR [6]. miTls-253 was made using miTls-253-Fw:

5'-TGCTGAGAAGATTGTGAACTTTGGCTGTTTTGGCCACTGACTGACAGCCA  
AAGCACAATCTTCT-3' and miTls-253-Rv: 5'-  
CCTGAGAAGATTGTGCTTTGGCTGTCAGTCAGTGGCCAAAACAGCCAAAGTT  
CACAATCTTCTC-3'. miTls-853 was made using miTls853-Fw:

5'-TGCTGAATTGTAACATTCTCGCCTAGGTTTTGGCCACTGACTGACCTAGGC  
GAATGTTACAATT-3' and miTls853-Rv:  
CCTGAATTGTAACATTCTCGCCTAGGTCAGTCAGTGGCCAAAACCTAGGCGAGA  
ATGTTACAATTC-3'.

### Animals

Heterozygous FUS/TLS ( $TLS^{+/-}$ ) knockout mice [4] were maintained on a C57BL/6J (B6) background. To obtain homozygous TLS knockout mice, heterozygous TLS mice (B6) were crossed with ICR mice. The F1 TLS heterozygote mice on a mixed background of B6 and ICR were intercrossed to obtain outbred  $TLS^{-/-}$  mice. For behavioral analysis, *in vitro* fertilization was performed to obtain large numbers of animals. To maximize the survival of homozygote KO mice, roughly half of the pups with normal body size, which were presumably wild type or heterozygotes, were removed from the cages. The genotypes of all animals were confirmed by PCR. In all experiments, only male mice were used for all genotypes. Animals used for life span

analysis were not used in behavioral or histological analyses. All the experiments with mice were approved by the Animal Experiment Committee of the RIKEN Brain Science Institute.

### **Behavioral analysis**

The experimental room was maintained in 12 hr light-12hr dark periods (light period: 8:00 AM to 8:00 PM). We maintained three to five animals per cage, with an exception for ICR/B6 mice with one or two animals per cage to avoid fighting. The number of animals used in an experiment was determined by the capacity and availability of experimental equipments as well as experimenters. Each experiment was conducted by the same experimenter. Animals were tested blindly for genotype. All animals used for experiments were included in data analysis.

A Rotarod test was performed using MK-610 (Muromachi Kikai Tokyo, Japan). The time duration of mice on the Rotarod was measured. In one set of experiments, three trials per animal were performed with intervals of at least 30 minutes between trials. The average of three trials was used for data analysis (two-tailed unpaired t-test). Animals were tested at 39 weeks (n=13 for TLS<sup>+/+</sup>, n=22 for TLS<sup>-/-</sup>).

For the analysis of spontaneous home cage activity, mouse movement was automatically monitored using SCANET (Melquest, Toyama, Japan) for 6 or 7 days. Each animal was maintained in a cage with bedding, water, and food and let move freely. The cage was located inside of an apparatus equipped with an infrared sensor to detect mouse movement. Animals were tested at 8 or 9 weeks of age (n=12 for TLS<sup>+/+</sup>, n=11 for TLS<sup>-/-</sup>).

For an open field test, an automatic detection system with four 50 cm x 50 cm chambers was used for ICR/B6 mice at 36 weeks (n=10 for TLS<sup>+/+</sup>, and n=14 for TLS<sup>-/-</sup>).

In both cases, mouse behavior was analyzed for 30 minutes. Total distance of the movement, moving speed, and time spent in the center area were analyzed. ICR/B6 mice were analyzed.

The elevated plus maze test was performed using equipment from O' Hara & Co. , Ltd. and Time EP2 software. Animal behavior on the plus maze was recorded for 10 minutes. The time spent on open arms, closed arms, and the central platform was analyzed by the software. ICR/B6 outbred animals were tested at 34 weeks old (n=10 for TLS<sup>+/+</sup> and n=16 for TLS<sup>-/-</sup>).

Light-dark box analysis was performed using an apparatus previously described [10]. Animals were first put in the light compartment. The time duration of the first transition into dark compartment, the number of transitions, and total time spent in each chamber were analyzed for 10 minutes. ICR/B6 outbred animals were tested at 40 weeks old (n=13 for TLS<sup>+/+</sup> and n=21 for TLS<sup>-/-</sup>).

### **Tremor analysis**

Tremor measurement was based on a method described previously (Park et al., 2010). A wireless accelerometer, MVP-RF8-EC (MicroStone, Nagano, Japan), was attached to the bottom of a plastic box with a cover that can be hung in the air by a plastic string. A mouse was placed inside of the box and allowed to move freely. The motion of the mouse was recorded by the accelerometer for 1-5 minutes at a sampling rate of 1 kHz. The resultant values of every 1024 data points on the x axis was subjected to fast Fourier transformation using Excel 2003 (Microsoft) and obtained 58 power spectrum data sets per minute. The averaged amplitude at every frequency was calculated. For analysis longer than 1 minute, the averaged values of the data at every minute was presented. We used data corresponding to frequencies ranging from 1 to 100 Hz. Motion

power percentage [8] was calculated as (sum of amplitude at 10~20 Hz)/(sum of amplitude at 0~100 Hz) x 100 for each 1.024 second and averaged for every minute. Animals were tested at 55 weeks old for ICR/B6 TLS<sup>+/+</sup> (n=13) and TLS<sup>-/-</sup> (n=15) mice and at 66 weeks old for B6 inbred TLS<sup>+/+</sup> (n=14) and TLS<sup>+/-</sup> (n=10) mice. For positive control experiments, either saline or harmaline dissolved in saline (30 mg/kg) was injected intraperitoneally into wild type animals at 8-12 weeks old. Tremor measurements were performed before and after injection for each animal. The results were analyzed by two-tailed unpaired t-test.

### **Antibodies**

Primary antibodies used in this study are listed bellow. Rabbit anti-TLS-M, anti-TLS-C, anti-EWS-M, anti-TAF15-M, and anti-Uqbln2 were described previously [1,2]. Secondary antibodies were anti-mouse, anti-rabbit, anti-goat, or anti-Guinea pig IgG antibodies conjugated to Alexa-488, Alexa-546, or Alexa-634 (Molecular Probe), to horse radish peroxidase (ECL anti-rabbit or anti-mouse IgG Horseradish Peroxidase Linked whole antibody, GE Healthcare, and Peroxidase-conjugated AffiniPure Donkey Anti-Goat IgG, Jackson Immuno research), or to biotin (Vector Laboratories).

| <b>Antibody</b>   | <b>Source</b>   | <b>Number</b> | <b>Host</b> |
|-------------------|-----------------|---------------|-------------|
| TLS-M             | Doi et al. 2008 | -             | rabbit      |
| TLS-C             | Doi et al. 2008 | -             | rabbit      |
| EWS-M             | Doi et al. 2008 | -             | rabbit      |
| TAF15-M           | Doi et al. 2008 | -             | rabbit      |
| UBQLN2            | Doi et al. 2004 | -             | rabbit      |
| hnRNP A1 (9H10) : | Santa Cruz      | sc-56700      | mouse       |
| NMDAR1 (NR1-CT)   | upstate         | 06-311        | rabbit      |
| PSD95             | Abcam           | ab18258       | rabbit      |
| DDX5              | Abcam           | ab10261       | goat        |

|                      |                   |                  |            |
|----------------------|-------------------|------------------|------------|
| alpha-tubulin        | Sigma             | T9026            | mouse      |
| gamma-tubulin (C-20) | Santa Cruz        | sc-7396          | goat       |
| HSC70 (K-19)         | Santa Cruz        | sc-1059          | goat       |
| Sqstm1               | Progen            | GP62-C           | Guinea pig |
| Sqstm1               | MBL               | PM045            | rabbit     |
| TDP43                | Proteintech Group | BC001487 10782-1 | rabbit     |
| TLS 4H11             | Santa Cruz        | sc-47711         | mouse      |
| GFP                  | Molecular Probe   | A6455            | rabbit     |
| GFP                  | Roche             | 11 814 460 001   | mouse      |
| GFP                  | MBL               | 598              | rabbit     |
| Chat                 | Millipore         | AB144P           | goat       |
| Rck/p54              | MBL               | PD009            | rabbit     |
| SMN                  | BD                | 610646           | mouse      |
| MAP2                 | Millipore         | AB5622           | rabbit     |
| GFAP                 | Dako              | Z0334            | rabbit     |
| Iba1                 | Wako              | 019-19741        | rabbit     |
| TIAR (C-18)          | Santa Cruz        | sc-1749          | goat       |
| eIF3 $\eta$ (N-20)   | Santa Cruz        | sc-16377         | goat       |
| RFP                  | MBL               | PM005            | rabbit     |
| LaminB (M-20)        | Santa Cruz        | sc-6217          | goat       |
| FUS/TLS              | Sigma             | HPA008784        | rabbit     |
| Ubiquitin            | Chemicon          | MAB1510          | mouse      |
| G3BP                 | BD transduction   | 611126           | mouse      |
| FMRP                 | Chemicon          | MAB2160          | mouse      |
| HSP60(K-19)          | Santa Cruz        | sc-1722          | goat       |
| hnRNPA2B1 (DP3B3)    | Santa Cruz        | sc-32316         | mouse      |
| GRP78 (Bip)          | stressgen         | SPA-826          | rabbit     |
| Bip                  | BD                | 610978           | mouse      |
| NEUROFILAMENT200     | Sigma             | N5389            | mouse      |
| Neurofilament (DA2)  | Abcam             | ab7255           | Mouse      |
| MBP (SMI-94)         | Covance           | SMI-94R          | mouse      |
| Kv1.1 (K20/78)       | NeuroMAB          | 75-007           | mouse      |

### Biochemical analysis of mouse tissues

All extraction buffers were supplemented with 1  $\times$  complete protease inhibitor cocktail

(Roche) and pre-chilled on ice except for those containing 2% SDS. For preparation of total lysate used for SDS-PAGE or AGERA, frozen brain regions or spinal cord was homogenized in hypotonic buffer [10 mM HEPES (pH7.9), 1.5 mM MgCl<sub>2</sub>, 10 mM KCl] at a ratio of 1.5 ml buffer per 0.1 mg tissue sample using Teflon homogenizers on ice. NP-40 was then added to the homogenate to a final concentration of 0.5 % and incubated on ice for 30 minutes. The resultant lysates were frozen at -80°C for storage or used immediately for subsequent preparation. 10% SDS and 5 M NaCl were added to the lysate to a final concentration of 2% and 0.35 M, respectively. The mixture was sonicated for 20 seconds twice using a Branson Sonifier at room temperature, and then boiled for 5 minutes. Protein concentration was determined using Micro BCA protein assay (Thermo Scientific). Protein concentration of samples were adjusted using the same buffer (hypotonic buffer + SDS + NaCl). Protein concentration of the adjusted samples was determined using Micro BCA protein assay again. If necessary, protein concentration was further adjusted. Samples were used immediately or frozen at -80°C for storage. Samples were boiled for 5 minutes and subjected to SDS-PAGE using 5-20% gradient gels (e-PAGEL, ATTO) or AGERA. After electrophoresis, proteins were transferred to a PVDF membrane for 90 minutes at 150 mA for 1 h using a semidry blotter at room temperature or at 40 V using a tank blotter in a cold room. Transferred proteins were detected by immunostaining.

### **Cell death analysis**

Cell death in mouse brain sections was analyzed using a Deadend colorimetric TUNEL system (Promega), Fluorojade-C (Millipore), or FD NeuroSilver kit II (FD Neurotechnologies, Inc), according to the manufacturer's recommendation. We examined 8 or 10 week-old mice but did not detect a specific increase in dead or dying



cells in TLS KO animals compared to WT animals.

### **Cell culture and transfection**

Neuro2a (N2a) cells were maintained in Dulbecco's modified Eagle's medium (DMEM) supplemented with 10% fetal bovine serum. For transfection assays, cells were cultured in 12-well plates or 10 cm dishes and transfected with plasmids using Lipofectamine 2000 (Invitrogen) according to the manufacturer's instructions. Cells were harvested at 24-72 h post transfection. For cell sorting, transfected cells in several 10 cm dishes were detached using trypsin and collected in DMEM. For RNA interference-mediated knockdown of endogenous FUS/TLS, miTls-253 and miTls-853 were transfected. miLuc-200 [6] was used as a negative control. For RNA preparation, harvested cells were treated with RNeasy Mini Kit together with RNase-Free DNase Set (QIAGEN).

### **Microarray analysis**

Total RNA was extracted from frozen mouse brain regions or spinal cord using TRIzol reagent (Invitrogen). The resultant RNA was further purified using RNeasy and RNase-free DNase kit (Qiagen). 100 ng of RNA was amplified with Ambion WT Expression kit and labeled with WT Terminal Labeling kit (Affymetrix). Mouse Exon 1.0 ST array (Affymetrix) was hybridized with labeled probes according to the manufacture's protocol. Dataset analysis was performed using GeneSpring GX (Agilent Technologies) and AltAnalyze [3]. For gene expression levels, we noticed correction of multiple comparisons by the method of Benjamini and Hochberg was too stringent. For example, the raw and corrected P values for FUS/TLS in the ExonArray analysis of striatum were 0.001 and 0.62, respectively. Thus, exploration of altered genes using the corrected P-values could result in a large number of false negatives and was not

practically informative. This may be mainly due to the small size of samples ( $n=3$  for each region) and the relatively large number of tests ( $> 28000$  probesets). We compared qPCR and ExonArray results and found that the majority of tested genes showed concordant results ( $r=0.89$ , Fig. S5a, left). In many cases, genes with marginal P values (0.01~0.05) in ExonArray could be reproduced by qPCR analysis (Fig. S5a, right). Assuming that qPCR provides accurate measurements of expression, these results indicate an empirical false discovery rate around 15% (4/27) when raw p-value  $<0.05$  was used as a threshold. For counting the number of differentially expressed genes (in Fig. 4a) and for gene ontology analysis, we used a more stringent threshold  $P<0.005$  to select genes. Thus, we adopted the use of raw p values rather than FDR-corrected ones. For the same reason, we used raw P values for the evaluation of RNA processing analysis in AltAnalyze. Using a loosened threshold in the ExonArray analysis was supported by a recent report [11]. We used the FIRMA method [9] for detection of RNA processing. NCBI37/mm9 was used as a mouse genome assembly. Gene ontology analysis was performed using DAVID [5].

### **Quantitative PCR (qPCR)**

Quantitative PCR analysis was performed using LightCycler 480 (Roche) according to the manufacturer's protocol. For quantification using SYBR Green, FastStart Universal SYBR Green Master (Roche Applied Science) was used. Primer sets were designed using either PrimerExpress (Applied Biosystems) or PrimerQuest (Integrated DNA Technologies). Gapdh was used as a reference of normalization. For most qPCR experiments, we used cDNA samples of mice that were also used for microarray analysis. We prepared additional striatal cDNA samples for the experiment shown in Supplementary Fig. S5b. The sequences of primers are listed as follows.

| Name              | sequence (5'-3')                | Name                  | sequence (5'-3')            |
|-------------------|---------------------------------|-----------------------|-----------------------------|
| RT-Tls-3UTR-Fw    | CCCAGTGTACCCTTGTTATTTTGT        | RT-Smarca1-Fw         | TCGGGCACATCGCATTG           |
| RT-Tls-3UTR-Rv    | CCCCCAAAAAAAAAATATCCA           | RT-Smarca1-Rv         | GTGTTGTCTGTAATGAGACGGAAGA   |
| RT-Htt-int1-probe | FAM-CAGCTCCCTGTCCCGCGG-ZEN/IBFQ | RT-Efemp1-Fw          | CAATGAACCTGGGAAGTTCTCAT     |
| RT-Gdpd3-Fw       | GGGTCAGACCGGCACATG              | RT-Efemp1-Rv          | GCTGCGCACCACCTTCGT          |
| RT-Gdpd3-Rv       | CATGGGAGTCCTTGAAATTTT           | RT-Igfbp4-Fw          | AACATCCCAACAACAGCTTCAA      |
| RT-Gdpd3-9-Fw     | TCTCCTGTACTTTGTTCTGCCAC         | RT-Igfbp4-Rv          | TCTAATTTTGCCATATGCTTCTG     |
| RT-Gdpd3-9-Rv     | ACTGCTTCCATGGTGTCTCCAGT         | RT-Tgfb1-Fw           | AGGTTGCCCAGCAGCTCTT         |
| RT-Gdpd3-153-Fw   | ACTGGAGAACCACCATGGAAGCAGT       | RT-Tgfb1-Rv           | GATCCCACTCCCATGGT           |
| RT-Gdpd3-153-Rv   | ATCCTTATTTAGGCCTGACTGGCG        | RT-Dcn-Fw             | GCTGCGGAAATCCGACTTC         |
| RT-Gdpd3-208-Fw   | TTGGAATTTGACTGCCAGCTCACC        | RT-Dcn-Rv             | TGCCGCCAGTTCTATGAC          |
| RT-Gdpd3-208-Rv   | ATCCTTATTTAGGCCTGACTGGCG        | RT-Ews-Fw             | CAATCCGGGCTGTGGAAA          |
| RT-Gdpd3-379-Fw   | GGGTCAGACCGGCACATG              | RT-Ews-Rv             | GCCTTACTGTTGCATTCTG         |
| RT-Gdpd3-379-Rv   | CATGGGAGTCCTTGAAATTTT           | RACE-Gdpd3-340Fw      | GAGTTGGAAATTTACTTCTCAC      |
| RT-Cort-Fw        | TGTCCAAGAGCCAGGAAAGG            | RACE-Gdpd3-250Rv      | GCCATCCCGGTGAGCTGGCAG       |
| RT-Cort-Rv        | TCTTGCAGGGCTTTTTATCCA           | RACE-Gdpd3-280Rv      | ACTGGCGGGACAGTTCTTG         |
| RT-Miip-Fw        | AGAGCAGCGGTGTGGAAGA             | Ptk2b-spl-ex23-Fw     | CCCAGCCGCCCAAGTACAGACCT     |
| RT-Miip-Rv        | GCCGGCGGTTGATACG                | Ptk2b-spl-ex25-Rv     | CAAGCATCTTCTCTCGCCTCAG      |
| RT-Arnt2-Fw       | TGGTCCACTGCACAGTTACA            | Cnr1-spl-ex1-Fw       | GGCGACAGGTGCCGAGGGAGCTTC    |
| RT-Arnt2-Rv       | TTCTTCGGGTATGGTCATTCCT          | Cnr1-spl-ex5-Rv       | GTCTCCTGCCGTATCTTTTCTTG     |
| RT-Hrh3-Fw        | GCCACTGCTATGCTGAGTTCTTCT        | Ogdh-spl-ex3-Fw       | AAACACCAATGCTGGAGCCCCACC    |
| RT-Hrh3-Rv        | AAGAAGGTAACGCTGAGGAAGGGT        | Ogdh-spl-ex7-Rv       | CTCCAGCCGACGGATGATCTCCC     |
| RT-Rad9b-Fw       | TGTATTTCCAAGACAGCCAGCCCT        | Mapt-splicing-ex2-Fw  | AAGACCATGCTGGAGATTACACTCTGC |
| RT-Rad9b-Rv       | TGTCAGAAGAGCAATGGCCTCAGT        | Mapt-splicing-ex5-Rv  | GGTGTCTCCGATGCCTGCTTCTT     |
| RT-Casp9-Fw       | TCTTCACGCGCAGATGA               | Mapt-splicing-ex89-Fw | TCCCCCTAAGTACCATCAG         |
| RT-Casp9-Rv       | CCGCCGAGACCCAGATC               | Mapt-splicing-ex11-Rv | GCCAATCTTCGACTGGACTC        |
| RT-Myo7a-Fw       | CGAGGGATTACAGCTTTTTG            | RT-Igfbp1-ex1-2Fw     | ACTCCTTGAGAAGGCTGCTGGAAT    |
| RT-Myo7a-Rv       | CAGTCTGTCAGGTGTCGGACAA          | RT-Igfbp1-ex1-2Rv     | ACTTCAGGTCGGTGAAGCAATCT     |
| RT-Gabra2-Fw      | GCCGAATGTCCCATGCA               | RT-Igfbp1-ex2-int2Fw  | AGCTCCTCCATGGCCTATCCAAAT    |
| RT-Gabra2-Rv      | GGGCATGAATGAGCATCCAT            | RT-Igfbp1-ex2-int2Rv  | CACACACACACACACCACACAA      |
| RT-Igfals-Fw      | GGGCCTCAGTCACCTTTGG             | RT-Thra-ex16-int16Fw  | TACGTCAACCACCGCAAACACAAC    |
| RT-Igfals-Rv      | CGTGTGAGCAGGACCACTA             | RT-Thra-ex16-int16Rv  | GCACTCGACTTTTATGTGGAGGAA    |
| RT-Zfp69-Fw       | TGTCAGTGGCAGGATATCAACTTT        | RT-Thra-ex14-15Fw     | AGAGGCCTTCAGCGAGTTACCAA     |
| RT-Zfp69-Rv       | GGTCCCTCTCCTTTTCCAACCT          | RT-Thra-ex14-15Rv     | AGGAGGATGATCTGGTCTTCGCAA    |
| RT-Masp2-Fw       | CGCCTGCGCCTCTACTTC              | RT-Thra-ex16-17Fw     | TACGTCAACCACCGCAAACACAAC    |
| RT-Masp2-Rv       | TCATACTCGCAGCGGTAAGAGA          | RT-Thra-ex16-17Rv     | ACCCTGAACAACATGCATTCCGAG    |

|               |                           |                      |                           |
|---------------|---------------------------|----------------------|---------------------------|
| RT-Gm7609-Fw  | CAAGGAATGCGGGCCTTAC       | RT-Enpp5-ex3-int3-Fw | TCTTGCTAACTGGAGGCTGTGGA   |
| RT-Gm7609-Rv  | CCCCAAATACCAGCCAACAC      | RT-Enpp5-ex3-int3-Rv | AAGTCTATGTGCCACCAAGCGGTA  |
| RT-Xlr4b-Fw   | CAGACCTCCCAAGCAACCA       | RT-Enpp5-ex4-Fw      | ACCTTCTCAGTTCAGCAACTCCCA  |
| RT-Xlr4b-Rv   | TGAAGCTGCTGTGAATCATTAGATG | RT-Enpp5-ex4-Rv      | ATGATGCTGCCAAGAGAGACACCT  |
| RT-Tmem116-Fw | ACCCTGCTGATCATGAAGCTGACA  | RT-Inpp5f-ex23-Fw    | TTGTGTCAGCACCTCGATTAGGCA  |
| RT-Tmem116-Rv | TGCACTGTGCCAGCCATAAATGC   | RT-Inpp5f-ex23-Rv    | TTCCCAAGTTCACTTCCAGGACCA  |
| RT-Ccl25-Fw   | GACTGCTGCCTGGGTACCA       | RT-Inpp5f-ex2-4-Fw   | GCAGAAAGCGTTGGTAGGCAAACCT |
| RT-Ccl25-Rv   | CCTAGCATGCCGGAGAACA       | RT-Inpp5f-ex2-4-Rv   | AGCTCAAGCTCCTGAGGTTCCATT  |
| RT-Pdim3-Fw   | GGCACCCCGAGTGCTTT         | RT-App-ex6-7-Fw      | TGATGATGAGGATGTGGAGGATGG  |
| RT-Pdim3-Rv   | AGCCTTTCTGCTTGAGGTTGAG    | RT-App-ex6-7-Rv      | AAAGTACCAGCGGGAGATCATTGC  |
| RT-Taf15-Fw   | TCAAAACCAACAGTCTTACCATTCA | RT-App-ex10-11-Fw    | CGTCAAGCCAAGAACTTGCCCAAA  |
| RT-Taf15-Rv   | CACGACGGTCATCTTGTGTGT     | RT-App-ex10-11-Rv    | TGTCTCTCATTGGCTGCTTCTGT   |
| RT-Adam15-Fw  | TGGGCATGGCCATTCAG         | RT-Gria1-ex15Fw      | TGTGACACCATGAAAGTGGGAGGT  |
| RT-Adam15-Rv  | CATATTCACACCTCCGGAGAAGT   | RT-Gria1-ex16Rv      | GCCCTTGTCGTACCACCATTTGTT  |
| RT-Pmm2-Fw    | ACCTGCGGAAGGAGTTTGC       | RT-Gria1-ex17Rv      | TCAGCTTGTCTAAGACGCCTTGCT  |
| RT-Pmm2-Rv    | TGCTGATTGGCCACCTATG       | RT-Gria1-ex3-4Fw     | GCCCTCCATGTGTGCTTCAT      |
| RT-Hnrnpa1-Fw | GGGTTTGTACATATGCCACTGT    | RT-Gria1-ex3-4Rv     | GGACAAACTGATTGGATGTGTCA   |
| RT-Hnrnpa1-Rv | CCACCTTGTGTGGTCTTGCA      | RT-Copg-3UTR1-Fw     | CCTGGTGTGCACACTTGT        |
| RT-Crtc3-Fw   | TAACCCCTCCATCCAAGCCACACT  | RT-Copg-3UTR1-Rv     | GGCAGCCATCCTCCTGTTT       |
| RT-Crtc3-Rv   | TGGTGGAAAGAGACGGGTTGCTAA  | RT-Copg-3UTR2-Fw     | GTGCTCAGGGCCTCCACTT       |
| RT-Gpsm3-Fw   | CCCGGCTTCTTGAAGACAAA      | RT-Copg-3UTR2-Rv     | TGCACACGCTCCATTTGGT       |
| RT-Gpsm3-Rv   | CGCTGGCACTGGTGACTAAG      | RT-Araf-3UTR1-Fw     | TGGGATTGTGGGATCATTGG      |
| RT-Bcs1l-Fw   | CCGGGCGAGTAGATCTGAAG      | RT-Araf-3UTR1-Rv     | TCCCAGATGAAAAAATGAAACC    |
| RT-Bcs1l-Rv   | CTGGGTCAGCTGCCAGTGT       | RT-Araf-3UTR2-Fw     | CTGTGAATGTAAGTGGGACAGGAT  |
| RT-Nlgn1-Fw   | TTCCAGCTGGGCTGTAGTTTCCA   | RT-Araf-3UTR2-Rv     | CAGCATGGCTTTTTCCCAAA      |
| RT-Nlgn1-Rv   | TCACAGGTCCAAAGGCTATGTGGT  | RT-Araf-3UTR3-Fw     | CAGGGAGCCAATTTAGCAT       |
| RT-Tmem180-Fw | CATCACCTTGGGCCAGTACCT     | RT-Araf-3UTR3-Rv     | GGCAGAACAGTTATTGGCTGGTA   |
| RT-Tmem180-Rv | CCCACGAACCACAGGAAGTT      | RT-Araf-ex5-6-Fw     | CAGTCACTGCCTGGGACACA      |
| RT-Prrt2-Fw   | TTGTGGCCTTCGCTTATGC       | RT-Araf-ex5-6-Rv     | CCACAATGAGCTCCTCACCAT     |
| RT-Prrt2-Rv   | CACGTCCCCCTGTTGCA         | RT-Rnf14-ex3-4-Fw2   | TCCTGCGCATTGCATTTTAC      |
| RT-Gpr83-Fw   | TGCTCGTGTGGCCAAGAA        | RT-Rnf14-ex3-4-Rv2   | GCCTGGTCTACAGAGCGAGTTC    |
| RT-Gpr83-Rv   | CTGTGGTCACGTCGCCAAT       | RT-Rnf14-ex8-Fw      | AAAAAGTTCAGAGAAGGGCAACA   |
| RT-Ano2-Fw    | GCTGTCACCTCCGACTTTATCC    | RT-Rnf14-ex8-Rv      | CCTCCCACACCAAGCTCTGT      |
| RT-Ano2-Rv    | TGTCCCGTTGTGGCTATAGGA     | RT-Klhd10-ex1-2-Fw   | GGACAGCTCAACCGATTCTGT     |
| RT-Me3-Fw     | CCCTGGAAAAGGAAGGCATAC     | RT-Klhd10-ex1-2-Rv   | TCCCACCGTATTTTCTTCTACCT   |
| RT-Me3-Rv     | TGGAGTCCACCATCCAGATCTT    | RT-Klhd10-ex4-6-Fw   | CAACGGCAATGACGTCCAT       |
| RT-Cd180-Fw   | CTCTCCCACAGCCTCCTTGA      | RT-Klhd10-ex4-6-Rv   | GACAGCTGAGTAGAGCCCATCTC   |

|                |                          |                      |                          |
|----------------|--------------------------|----------------------|--------------------------|
| RT-Cd180-Rv    | GCTGGCAGGCCATCGA         | RT-Luc7l2-ex3-4-Fw   | GCTGCCCTTGCTGACTCTTT     |
| RT-Plekhn1-Fw  | CTACGGGCCTCCTTTTCCA      | RT-Luc7l2-ex3-4-Rv   | ATGACCATGCTATGTGATCAACAA |
| RT-Plekhn1-Rv  | TGGCGCTGTCTTCTCTGTTC     | RT-Luc7l2-ex6-7-Fw   | TGTTGCCCCACGATGTC        |
| RT-Gp1bb-Fw    | GCGCTGCTATTGGCACTTCTACTA | RT-Luc7l2-ex6-7-Rv   | TGGACTTTCAAGCATTCTCCAA   |
| RT-Gp1bb-Rv    | AGAGAGAACTCTTGATGGAGCGT  | RT-Myh10-ex19-21-Fw  | GCTTTGGAAGGACGAGATTGAG   |
| RT-Xlr3b-Fw    | CTGCTGGCAGGCACTCAA       | RT-Myh10-ex19-21-Rv  | TCATGAAGACCAGAAACTGTCA   |
| RT-Xlr3b-Rv    | TGGGTTCTGGCTGTCATCTG     | RT-Myh10-ex21-23-Fw  | TCCGCTGCATCATTCCAA       |
| RT-Celf3-Fw    | GTCGAGGAGACCGGAAGCT      | RT-Myh10-ex21-23-Rv  | GGTGCGGGTCCAGTTTCC       |
| RT-Celf3-Rv    | CATCCTCATCTGTCTGCTGCTTT  | RT-Abcc5-UTR1-Fw     | GCTCCCAGTGTTCATGCTT      |
| RT-Pgap2-Fw    | TGGCGGCTGACCAAGAA        | RT-Abcc5-UTR1-Rv     | CCAGGAACTCGACAACCTCTGT   |
| RT-Pgap2-Rv    | GCCGCTGTTTCCAGCTGTA      | RT-Abcc5-UTR2-Fw     | CAGCCACGCTTGGCAGTACT     |
| RT-Pspc1-Fw    | AGCACCCGGACGAGGAA        | RT-Abcc5-UTR2-Rv     | GCTAGCCCCGAGCCACACA      |
| RT-Pspc1-Rv    | CGGCTTGAGGAACTCTTGATG    | RT-Arntl-ex18-Fw     | AAAGAGGACTCATCCCCTGTCCCA |
| RT-Atxn2l-Fw   | TCCTGACAGCTGTAGTGGGTTCT  | RT-Arntl-ex18-Rv     | ATTTCTCCGCGATCATTCCGACCT |
| RT-Atxn2l-Rv   | CCCTCGTAAGTGGTGCCATT     | RT-Arntl-ex21-Fw     | GCTTTGGCAACAGCTGCAGTATCA |
| RT-Chuk-Fw     | GGCACAGTAACCCCTCCAGTAT   | RT-Arntl-ex21-Rv     | TGTATCAATGGCTCTGAGGTGGCT |
| RT-Chuk-Rv     | CCACACATGTCAGAGGATGTTCA  | RT-Gdap111-ex6dis-Fw | GTGGCACCCCTAAAACCCATCT   |
| RT-Tasp1-Fw    | TCACCTTTCCTTGCCCTGTGAA   | RT-Gdap111-ex6dis-Rv | AGGGTGTGCCCATGGAATT      |
| RT-Tasp1-Rv    | CATGACCGGAGAACGATCACT    | RT-Gdap111-ex6pro-Fw | ACCACTCTGCTGTCAGCTGTTATC |
| RT-Slc25a12-Fw | TCCTCCGAGACATTCCCTTCT    | RT-Gdap111-ex6pro-Rv | TGGCGGTTTCCGTTTGA        |
| RT-Slc25a12-Rv | GGAGTTTGCAGTGAGCGTACAC   | RT-Tuba4a-ex5dis-Fw  | GCCGCTTGTGACCTTTTAATTT   |
| RT-Tac2-Fw     | CCTGCTTCGGAGACTCTACGA    | RT-Tuba4a-ex5dis-Rv  | CCCCCTTGGCAAGTCTCA       |
| RT-Tac2-Rv     | GCACTTTCAGCAATCCTTCCA    | RT-Tuba4a-ex5pro-Fw  | GCGTGTGTGTGCATGCT        |
| RT-Zfp644-Fw   | GGTGTGACGAGGTTTACATTCT   | RT-Tuba4a-ex5pro-Rv  | ACGGGCCAGGCTTCA          |
| RT-Zfp644-Rv   | ACAATGGTCCCCGAAAGACTAG   | RT-Me3-ex9-10-Fw     | GCTGAACTCTTGCCAGAAGACAA  |
|                |                          | RT-Me3-ex9-10-Rv     | TGCCAACATCTAGCAGGACAGGAA |

### PCR-based detection of alternative RNA processing

For alternative splicing detection, primer sets were designed to amplify different isoforms in different sizes. The sequence of primers is listed above. PCR products were resolved by 1.0-2.5 % agarose gel electrophoresis or 5-20 % gradient polyacrylamide gel electrophoresis and stained with ethidium bromide or SYBR Gold (Molecular Probe). The fluorescence of PCR products was captured by LAS4000 (GE Healthcare). Intensity of band signals was quantified by Multi Gauge V3.1 software (FUJIFILM).

## **Histological analysis**

Mice were anesthetized with pentobarbital and perfused through the left ventricle with 5 ml of PBS (pH7.4) to remove the blood followed by 50 ml of 4% paraformaldehyde in PBS (PH7.4). For preparation of paraffin blocks, the brains were collected, postfixed with the same fixative overnight and processed for paraffin embedding. The blocks were cut into 4- $\mu$ m sections with cryostat. For frozen section preparation, the perfused brains were collected and further fixed with the same fixative overnight, followed by treatment with 20% sucrose in PBS for 2 days and then with 30% sucrose solution overnight. The brains were mounted in Tissue mount (Chiba Medical) and cut into 10  $\mu$ m sections with a cryostat.

For immunohistochemistry, sections were treated with primary antibodies and detected using ABC Elite kit (Vector Laboratories) and diaminobenzidine substrate. When necessary, paraffin sections were pre-treated with autoclave in citrate buffer (pH 6.0) for antigen retrieval. For the analysis of skeletal muscles, frozen sections were prepared from quadriceps muscles of TLS<sup>+/+</sup> and TLS<sup>-/-</sup> mice and stained with HE. For counting the number of motor neurons, paraffin sections of thoracic spinal cord were stained with anti-choline acetyltransferase (Chat). For each animal, at least 9 sections (with intervals of at least 4 sections) were stained. The average number of Chat-positive cells was determined. Light microscopic images were captured using BIOREVO BZ-9000 (Keyence).

For counting Gems, hippocampal sections from 8 week old mice were stained with anti-SMN1. The number of nuclear dot-like staining of SMN1 was counted in each cell of the CA3 region from three animals of TLS<sup>+/+</sup> and TLS<sup>-/-</sup> mice. At least four microscopic fields per animal were used for counting.

### **Electron microscopy**

8-12 week-old mice anesthetized with pentobarbital were perfused with 2% paraformaldehyde–2.5% glutaraldehyde in 0.1 M cacodylate buffer (pH 7.4). Brains were sectioned at 500  $\mu\text{m}$  thickness, osmicated with 1%  $\text{OsO}_4$  in cacodylate buffer, dehydrated through a gradient series of ethanol, and then embedded in epoxy resin (Epon 812, TAAB Laboratories Equipment Ltd., Berkshire, England). Ultrathin sections (80 nm thick) from the samples were cut with an ultramicrotome (Ultracut UCT, Leica Microsystems, Wetzlar, Germany), collected on 200-mesh uncoated copper grids and then counterstained routinely with uranyl acetate and lead citrate. The sections were examined electron microscopically (Tecnai 12, FEI, Eindhoven, Netherlands).

### **Statistical analysis**

We used a two-tailed unpaired t-test for comparison between two samples. We used ANOVA followed by Tukey's post-hoc test for multiple comparison. For the analysis of survival rate, we used the Kaplan-Meier method followed by log-rank test. We considered the differences significant when P value is less than 0.05. In bar charts and line charts, error bars represent standard errors of the mean. The number of samples and P values are described in the figure legends.

## Supplemental References

1. Doi H, Mitsui K, Kurosawa M, Machida Y, Kuroiwa Y, Nukina N (2004) Identification of ubiquitin-interacting proteins in purified polyglutamine aggregates. *FEBS Lett* 571 (1-3):171-176.
2. Doi H, Okamura K, Bauer PO, Furukawa Y, Shimizu H, Kurosawa M, Machida Y, Miyazaki H, Mitsui K, Kuroiwa Y, Nukina N (2008) RNA-binding protein TLS is a major nuclear aggregate-interacting protein in huntingtin exon 1 with expanded polyglutamine-expressing cells. *J Biol Chem* 283 (10):6489-6500.
3. Emig D, Salomonis N, Baumbach J, Lengauer T, Conklin BR, Albrecht M (2010) AltAnalyze and DomainGraph: analyzing and visualizing exon expression data. *Nucleic Acids Res* 38 (Web Server issue):W755-762.
4. Hicks GG, Singh N, Nashabi A, Mai S, Bozek G, Klewes L, Arapovic D, White EK, Koury MJ, Oltz EM, Van Kaer L, Ruley HE (2000) *Fus* deficiency in mice results in defective B-lymphocyte development and activation, high levels of chromosomal instability and perinatal death. *Nat Genet* 24 (2):175-179.
5. Huang da W, Sherman BT, Lempicki RA (2009) Systematic and integrative analysis of large gene lists using DAVID bioinformatics resources. *Nat Protoc* 4 (1):44-57.
6. Kino Y, Washizu C, Oma Y, Onishi H, Nezu Y, Sasagawa N, Nukina N, Ishiura S (2009) MBNL and CELF proteins regulate alternative splicing of the skeletal muscle chloride channel *CLCN1*. *Nucleic Acids Res* 37 (19):6477-6490.
7. Lagier-Tourenne C, Polymenidou M, Hutt KR, Vu AQ, Baughn M, Huelga SC, Clutario KM, Ling SC, Liang TY, Mazur C, Wancewicz E, Kim AS, Watt A, Freier S, Hicks GG, Donohue JP, Shiue L, Bennett CF, Ravits J, Cleveland DW, Yeo GW (2012) Divergent



- roles of ALS-linked proteins FUS/TLS and TDP-43 intersect in processing long pre-mRNAs. *Nat Neurosci* 15 (11):1488-1497.
8. Martin FC, Thu Le A, Handforth A (2005) Harmaline-induced tremor as a potential preclinical screening method for essential tremor medications. *Mov Disord* 20 (3):298-305.
  9. Purdom E, Simpson KM, Robinson MD, Conboy JG, Lapuk AV, Speed TP (2008) FIRMA: a method for detection of alternative splicing from exon array data. *Bioinformatics* 24 (15):1707-1714.
  10. Takahashi E, Niimi K, Itakura C (2011) Emotional behavior in heterozygous rolling mouse Nagoya Ca v 2.1 channel mutant mice. *Neurobiol Aging* 32 (3):486-496.
  11. Yamashita Y, Matsuura T, Shinmi J, Amakusa Y, Masuda A, Ito M, Kinoshita M, Furuya H, Abe K, Ibi T, Sahashi K, Ohno K (2012) Four parameters increase the sensitivity and specificity of the exon array analysis and disclose 25 novel aberrantly spliced exons in myotonic dystrophy. *J Hum Genet* 57 (6):368-374.

## **Supplemental Tables** (See separate Excel file)

**Additional file 2: Table S1.** Gene expression analysis of FUS/TLS-deficient mice.

Gene expression changes detected using ExonArray and AltAnalyze. Genes that were altered 1.2-fold at a raw P value of  $<0.005$  are listed. Adjusted p values were calculated by the Benjamini-Hochberg method.

**Additional file 3: Table S2.** RNA processing analysis of FUS/TLS-deficient mice.

RNA processing changes detected using ExonArray and AltAnalyze. Exons that were altered by FIRMA fold change  $>2.0$  at a raw P value of  $<0.005$  are listed. Spread sheet modified from AltAnalyze.

**Additional file 4: Table S3.** Summary of validated RNA processing alterations in the TLS KO striatum.

Selected RNA processing events identified using AltAnalyze were validated either by qPCR or RT-PCR. The results are summarized. Statistical significance was analyzed by unpaired two-tailed t-test ( $n=3$ ).

**Additional file 5: Table S4.** Transcriptome changes found in both this study and Lagier-Tourenne et al.

Changes in gene expression and RNA processing caused by FUS/TLS depletion in this study and a previous one are listed [7]. A relaxed threshold ( $P<0.05$ ) was used for our list to maximize the detection of overlaps in these studies.

## Kino et al. Figure.S1

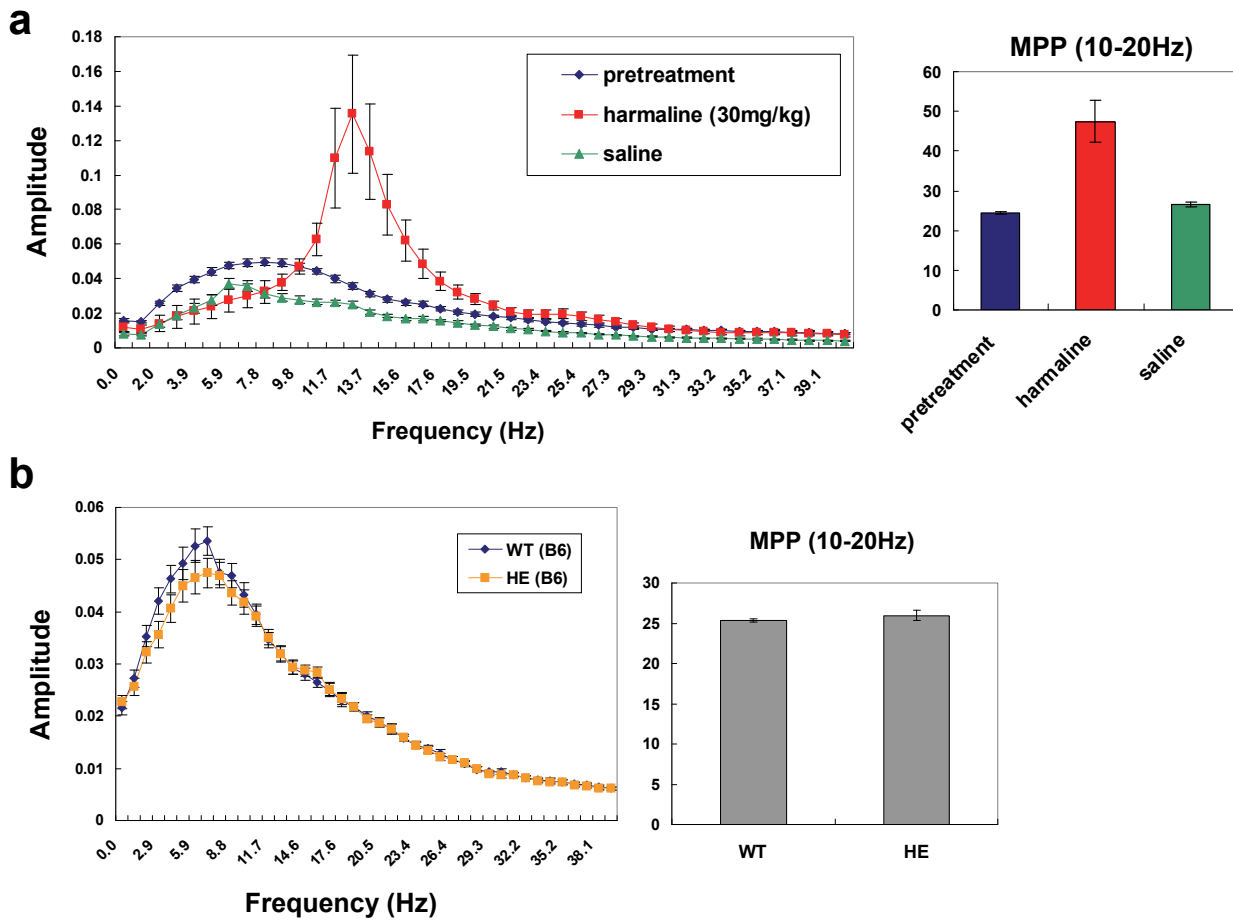

**Figure S1**

(a) Analysis of tremor-like movement of wild type mouse with or without harmaline treatment. Wild type mice of 8-12 weeks old were treated intraperitoneally with either saline or 30 mg/kg harmaline. Harmaline-treated mice clearly showed tremor-like movement starting from 5 minutes after treatment. Animal movement was recorded before and after injection. For the analysis of the drug effect, the data from 5 to 10 minutes after injection were used. Left chart shows the power spectra of animals with or without treatment ( $n=5$  for saline and  $n=6$  for harmaline treatment). Right chart shows the Motion power percentage (MPP) of these animals. (b) Analysis of tremor-like movement of inbred (B6) heterozygous FUS/TLS knockout mice and controls. Bar chart shows MPP analysis (mean  $\pm$  SEM; WT,  $n=14$ ; HE,  $n=10$ ).

## Kino et al. Figure.S2

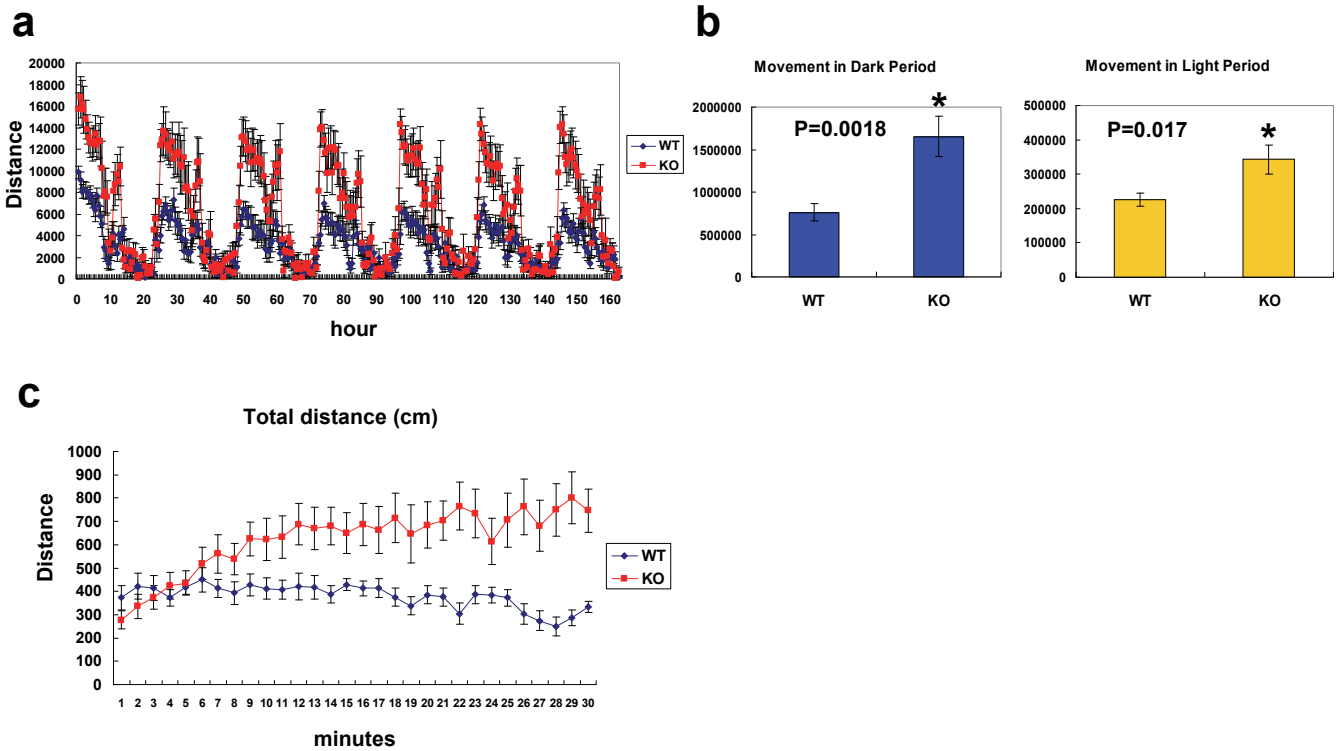

**Figure S2**

(a, b) Spontaneous home cage activity of WT and  $TLS^{-/-}$  mice (the same date set as Figure 2A). Distance of movement are shown for each 30 minutes in (a). Movement of mice in dark and light periods were separately analyzed in (b). P values were from unpaired two-tailed t-test ( $n=12$  for WT,  $n=11$  for KO animals). (c) Time course of locomotive activity in an open field test of FUS/TLS KO mice. Mean  $\pm$  SEM ( $n=12$  for WT,  $n=12$  for KO). KO mice showed a time-dependent increase in locomotion.

## Kino et al. Figure.S3

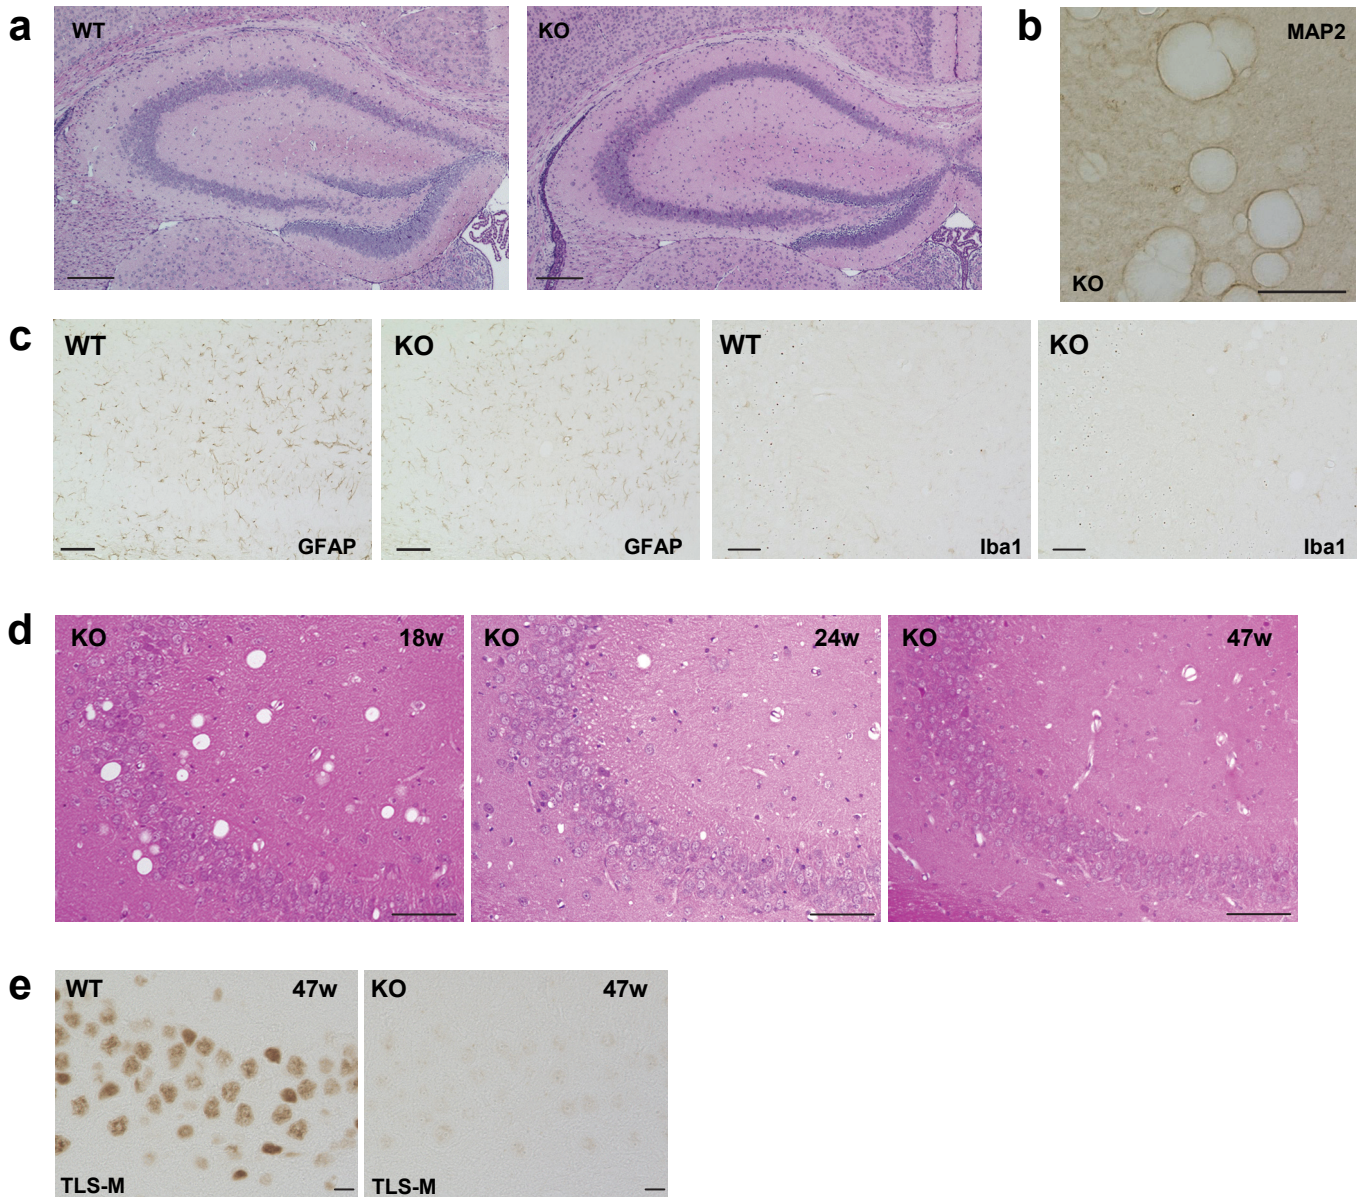

**Figure S3**

(a) Hippocampal sections of 3 week-old animals stained with hematoxylin-eosin. Scale bar: 200  $\mu\text{m}$ . (b) MAP2 immunoreactivity around vacuole-like structures in the KO hippocampus. Scale bar: 50  $\mu\text{m}$ . (c) Immunohistochemical analysis of GFAP and Iba1 in the hippocampus CA3 of TLS KO mice at 8 weeks. Scale bar: 50  $\mu\text{m}$ . (d) Hippocampal sections of KO mice stained with HE. Shown are KO mice with (18 and 24 weeks) and without vacuolation (47 weeks). Scale bar = 100  $\mu\text{m}$ . (e) TLS immunoreactivity in the CA3 region of WT and KO mice at 47 weeks. Scale bar = 10  $\mu\text{m}$ .

## Kino et al. Figure.S4

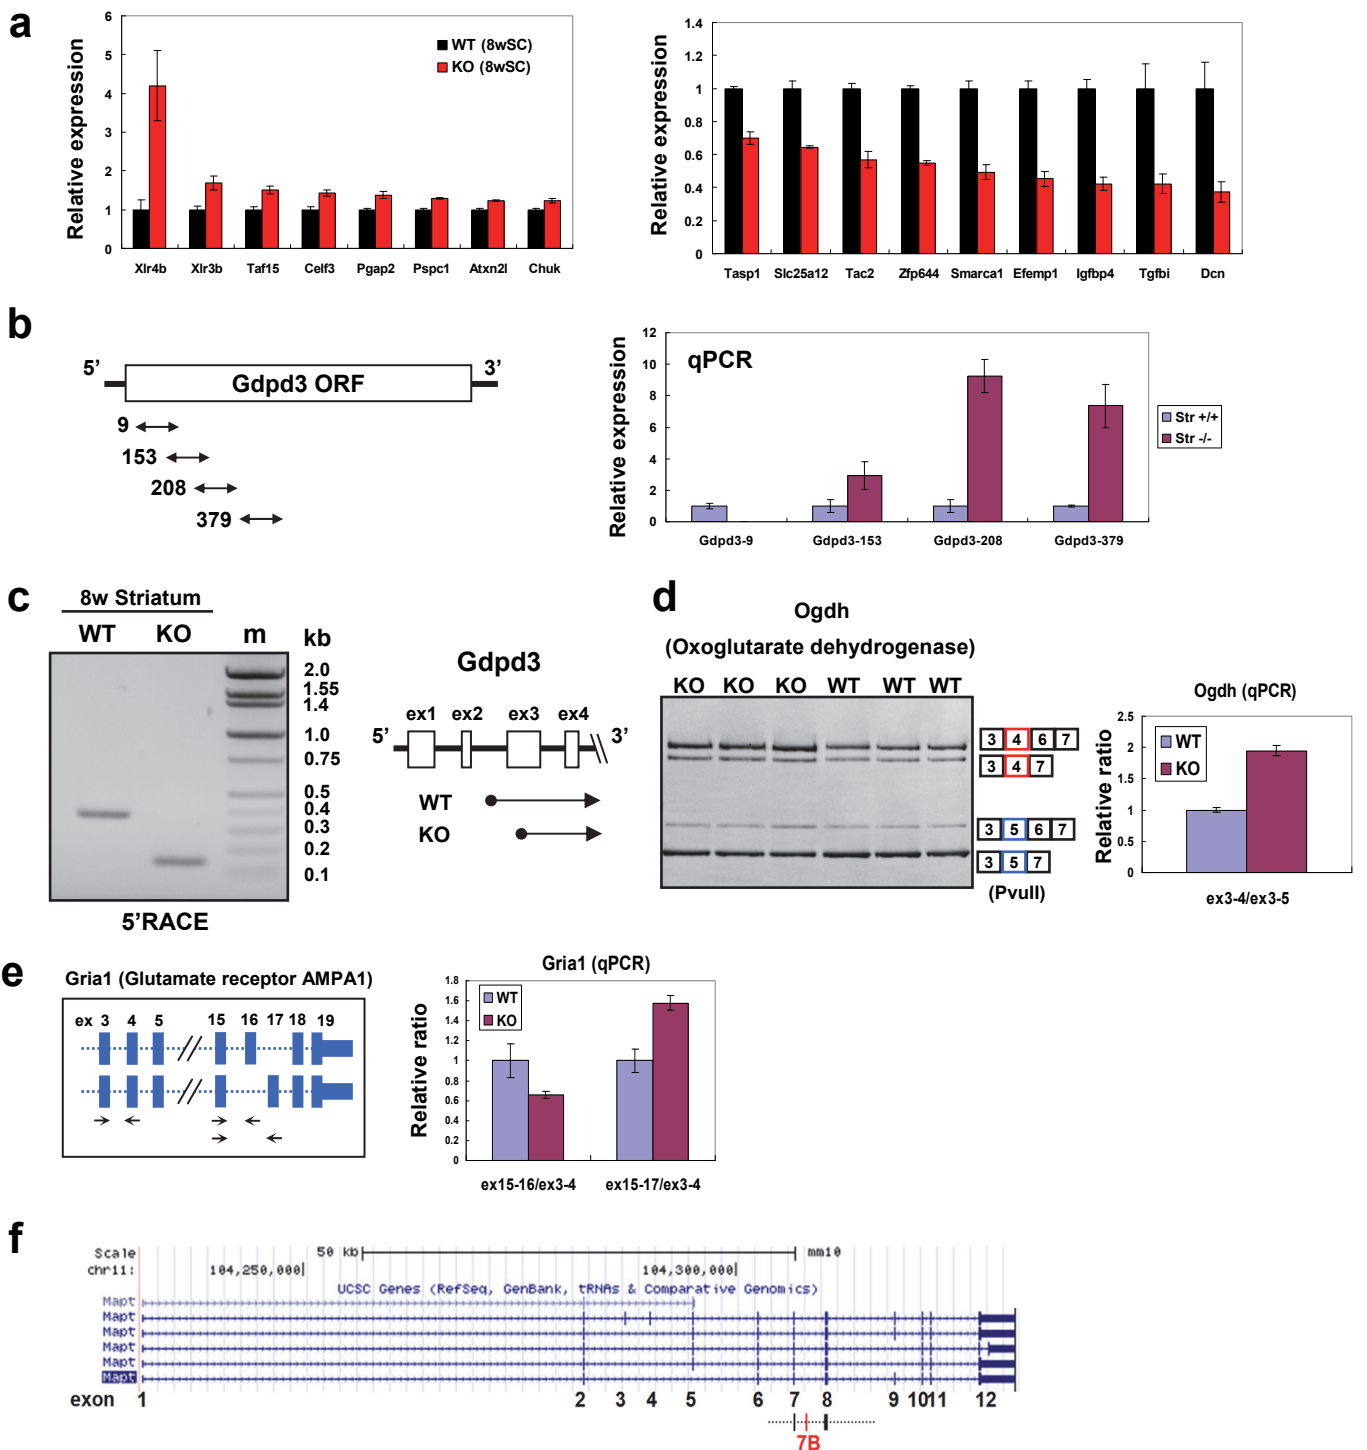

**Figure S4**

(a) Altered gene expression in the spinal cord of FUS/TLS KO mice at 8 weeks. qPCR results are shown (n=3) as in Fig. 4b. (b) Analysis of Gdpd3 expression in the striatum of TLS<sup>-/-</sup> and control mice. Right chart shows qPCR results using different primer sets (n=3). The locations of amplicons are indicated in the left. The expression of 5' region of Gdpd3 was smaller relative to the downstream region in TLS<sup>-/-</sup> mice. (c) Determination of the 5' end of Gdpd3 mRNA in WT and KO mice by 5'RACE. PCR products were resolved in agarose gel electrophoresis, excised, and sequenced. Gel image is shown in the right. 5' end of Gdpd3 in WT and KO mice. Both WT and KO mice produced 5'-truncated Gdpd3 mRNA, with more downstream transcriptional initiation in KO mice. (d) Alternative splicing of mutually exclusive exons 4 and 5 of Ogdh in TLS KO mice. RT-PCR and qPCR results are shown (n=3). (e) Alternative splicing of mutually exclusive exons 16 and 17 of Gria1. qPCR results using primer sets indicated in the upper panel are shown (n=3). (f) Gene structure of Mapt adopted from UCSC mouse genome browser. Exon numbers in this study are indicated. Exon 7B is a 54-nucleotide exon located between exons 7 and 8.

## Kino et al. Figure.S5

**a**

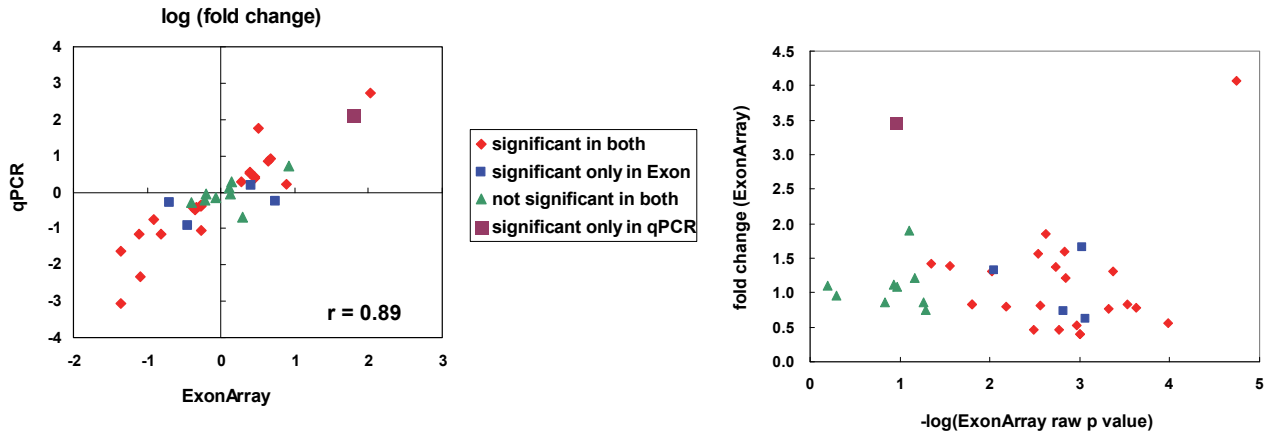

**b**

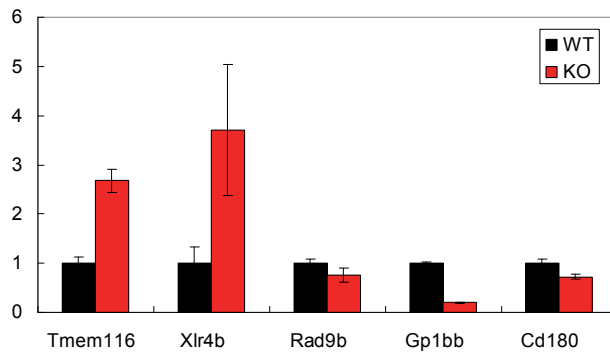

### Figure S5

**(a)** Comparison of ExonArray and qPCR results ( $n=37$  genes). Fold change of differentially expressed genes obtained by each method (log-transformed) were plotted (left panel). Genes were plotted according to their raw p values and fold change detected by ExonArray (right panel). Genes were classified into four groups depending on the significance and consistency of the results. See also Supplemental Materials and Methods (Microarray analysis). **(b)** Replication of qPCR results using additional sets of animals. cDNA samples from the striatum of WT and KO animals at 8 weeks were examined (mean $\pm$ SE,  $n=3$ ). We detected gene expression changes that were consistent with the initial sets of animals that are shown in Fig.4b.
