# Supplementary material for: FUS/TLS deficiency causes behavioral and pathological abnormalities distinct from amyotrophic lateral sclerosis
Source: Acta Neuropathol Commun. 2015 Apr 25;3:24. doi: 10.1186/s40478-015-0202-6 (PMC4408580; doi:10.1186/s40478-015-0202-6)
Supplement: Additional file 3: Table S2. — RNA processing analysis of FUS/TLS-deficient mice. [file 40478_2015_202_MOESM3_ESM.xls]

## Sheet: Table S2
Table S2	RNA processing analysis of FUS/TLS-modified mice
TLS KO vs WT 8w Striatum
Ensembl	FIRMA fold change	symbol	exons	regulation_call	probeset	baseline_ probeset_exp	constitutive_ baseline_exp	FIRMA_ raw p value	FIRMA_adjp	gene-expression-change	transcript cluster ID	exon annotations	probeset location
ENSMUSG00000039599	13.6883	Fam149b	E7-8	downregulated	5235283	5.05782	9.02082	0.00288369	0.985048	-0.13331	6817337		chr14:21185748-21185772(+)
ENSMUSG00000030780	11.7433	BC017158	E11-1	downregulated	4611639	9.74756	8.52403	9.40447e-05	0.939399	-0.106987	6971432		chr7:135416060-135416118(-)
ENSMUSG00000064115	10.2723	Cadm2	I2-107	downregulated	5355578	4.54791	12.1513	0.000534402	0.985048	-0.0969067	6846782		chr16:66965405-66965435(-)
ENSMUSG00000041303	9.59439	Gtf3c3	I13-3	downregulated	4388584	9.76687	8.03514	1.25204e-05	0.939399	-0.0940255	6758701		chr1:54464162-54464191(-)
ENSMUSG00000028690	9.03076	Mmachc	E3-2	downregulated	5068993	4.31608	10.3911	0.00307447	0.985048	0.0889167	6924808		chr4:116377014-116377053(-)
ENSMUSG00000003273	8.43026	Car11	E8-3	downregulated	5577394	9.1093	12.6168	0.00041171	0.985048	-0.0376033	6960403		chr7:52959982-52960023(+)
ENSMUSG00000048960	8.30857	Prex2	I19-3	downregulated	5451581	2.98553	9.37119	0.0017136	0.985048	0.0780121	6747565		chr1:11140106-11140134(+)
ENSMUSG00000059456	7.80567	Ptk2b	E24-3	downregulated	5285211	10.6645	11.0917	0.00252076	0.985048	-0.018605	6825445	cassette-exon|cassetteExon	chr14:66781865-66781961(-)
ENSMUSG00000022957	7.5825	Itsn1	E44-3	downregulated	5148490	7.96654	10.5982	0.00362376	0.985048	0.0838517	6843198	exon-region-exclusion|exon-region-exclusion	chr16:91913354-91913538(+)
ENSMUSG00000009079	7.48405	Ewsr1	I11-3	downregulated	4967313	8.55038	10.1539	0.00251964	0.985048	0.115439	6785697	intron-retention	chr11:4978992-4979290(-)
ENSMUSG00000041415	7.24377	Dicer1	I27-3	downregulated	4666607	4.69691	8.50922	0.001952	0.985048	-0.0547385	6803314		chr12:105931592-105931758(-)
ENSMUSG00000018479	7.19277	1700125H20Rik	E7-1	downregulated	5418152	4.50527	5.61248	1.39335e-05	0.939399	-0.63459	6783152		chr11:84994429-84994453(+)
ENSMUSG00000042055	6.93963	Wdr11	E12-1	downregulated	5239982	8.8374	9.66257	4.37845e-06	0.939399	-0.48311	6964478		chr7:136757414-136757441(+)
ENSMUSG00000024099	6.88383	Ndufv2	I2-2	downregulated	5268498	6.3483	11.8509	0.00429197	0.985048	-0.01717	6856695		chr17:66445895-66445932(-)
ENSMUSG00000030120	6.69757	Mlf2	I4-1	downregulated	5373896	6.93421	11.7073	0.00481582	0.985048	0.0339238	6949826		chr6:124882853-124882893(+)
ENSMUSG00000030729	6.66051	Pgm2l1	I9-5	downregulated	5515109	6.40363	9.95305	0.00242281	0.985048	0.0906933	6962925		chr7:107413849-107413878(+)
ENSMUSG00000022972	6.28948	1110004E09Rik	U8-2	downregulated	5138959	4.95831	9.04239	0.0013082	0.985048	0.228723	6847819		chr16:90925456-90925481(-)
ENSMUSG00000009079	6.13393	Ewsr1	I11-2	downregulated	5314529	9.11354	10.1539	0.000797227	0.985048	0.115439	6785697	intron-retention	chr11:4979330-4979371(-)
ENSMUSG00000027184	6.04834	Caprin1	I2-4	downregulated	4833545	6.22496	10.5298	0.000770835	0.985048	-0.0731383	6889304		chr2:103632691-103632894(-)
ENSMUSG00000028295	6.01748	1810030N24Rik	E3-1	downregulated	4852296	4.03495	8.45033	0.00456181	0.985048	0.336428	6920742		chr4:34721681-34722078(-)
ENSMUSG00000051166	5.71466	Eml5	I20-2	downregulated	5482936	5.75719	9.107	0.00390017	0.985048	0.068281	6803030		chr12:100079140-100079620(-)
ENSMUSG00000021198	5.6316	Unc79	E6-1	downregulated	4353124	12.8793	9.98994	0.00131751	0.985048	0.0470882	6797517		chr12:104249424-104249478(+)
ENSMUSG00000026748	5.48566	Plxdc2	I12-1	downregulated	5303146	5.76353	9.96073	0.00118102	0.985048	-0.230401	6875214		chr2:16644863-16644888(+)
ENSMUSG00000004455	5.39896	Ppp1cc	E6-3	downregulated	4465611	8.90254	12.2963	0.00400714	0.985048	0.319493	6934118	exon-region-exclusion|exon-region-exclusion	chr5:122622983-122623149(+)
ENSMUSG00000024665	5.36807	Fads2	I8-1	downregulated	4897608	5.74532	11.6014	0.00297259	0.985048	0.0805767	6871471		chr19:10140943-10140998(-)
ENSMUSG00000029328	5.32547	Hnrpdl	E6-3	downregulated	5132241	7.33844	10.3993	0.00423507	0.985048	-0.0475778	6940331	exon-region-exclusion|exon-region-exclusion	chr5:100465294-100465474(-)
ENSMUSG00000030795	5.29013	Fus	E13-4	downregulated	5139944	8.98643	9.46337	0.00095361	0.985048	-1.35188	6964374	alternative_polyA	chr7:135125405-135125528(+)
ENSMUSG00000030035	5.23864	Wbp1	E1-1	downregulated	4657325	6.16693	9.77808	0.00395478	0.985048	-0.168853	6955010		chr6:83071429-83071503(-)
ENSMUSG00000030621	5.19387	Me3	E22-2	downregulated	5579906	8.84667	10.5068	0.00426186	0.985048	-0.274803	6962467		chr7:97000899-97001282(+)
ENSMUSG00000037787	5.17845	2810002N01Rik	I7-1	downregulated	5036863	4.84014	8.66085	0.000736673	0.985048	-0.292734	6798229		chr12:112992707-112992977(+)
ENSMUSG00000018974	5.13462	Sart3	U19-2	downregulated	5087764	3.39374	7.4387	0.0030725	0.985048	0.0130057	6941180		chr5:114192327-114192357(-)
ENSMUSG00000022362	5.10968	9130401M01Rik	E6-2	downregulated	5077865	6.1495	8.97813	0.000603231	0.985048	0.0227208	6835932		chr15:57853871-57853920(-)
ENSMUSG00000035954	5.09127	Dock4	I1-38	downregulated	4673836	4.72741	10.687	0.00146941	0.985048	0.0689944	6794643		chr12:41283988-41284015(+)
ENSMUSG00000023353	5.05418	Agap3	I8-1	downregulated	4602989	10.9857	11.1182	0.00354359	0.985048	-0.0531683	6929297		chr5:23985941-23986013(+)
ENSMUSG00000003810	4.96686	Mast2	I8-2	downregulated	5535821	4.54266	9.91746	0.00250354	0.985048	0.133235	6924785		chr4:116011986-116012163(-)
ENSMUSG00000006273	4.93185	Atp6v1b2	I1-5	downregulated	5151564	5.21229	12.1819	0.00156666	0.985048	0.03497	6976923		chr8:71619024-71619318(+)
ENSMUSG00000059263	4.90691	Usp47	I24-4	downregulated	5024722	3.69361	8.97648	7.32911e-05	0.939399	0.0559767	6963521		chr7:119239343-119239776(+)
ENSMUSG00000052572	4.83239	Dlg2	I11-11	downregulated	4975942	9.18306	11.1371	0.0044237	0.985048	0.166721	6962537		chr7:98715198-98715245(+)
ENSMUSG00000010086	4.80661	Rnf112	I3-1	downregulated	4666179	7.49645	9.56029	0.00149032	0.985048	0.121284	6788836	intron-retention	chr11:61266644-61266823(-)
ENSMUSG00000038685	4.7953	Rtel1	E20-2	downregulated	5018163	5.8226	7.80975	0.00451747	0.985048	0.187345	6884262	exon-region-exclusion|exon-region-exclusion	chr2:181084472-181084589(+)
ENSMUSG00000023266	4.79067	Frs3	E11-2	downregulated	4993604	6.4469	8.53634	0.00482203	0.985048	0.0700311	6850793		chr17:47840893-47841060(+)
ENSMUSG00000021198	4.77246	Unc79	E5-1	downregulated	5345218	13.2535	9.98994	0.0031503	0.985048	0.0470882	6797517		chr12:104240032-104240183(+)
ENSMUSG00000035863	4.75598	Palm	I7-1	downregulated	5135552	6.56952	9.81599	0.00434945	0.985048	0.056778	6769147		chr10:79278516-79279333(+)
ENSMUSG00000034533	4.59094	Scn10a	I15-2	downregulated	4358987	5.2247	6.18033	0.00411818	0.985048	0.2099	6999442		chr9:119556263-119556563(-)
ENSMUSG00000022099	4.58366	Epb4.9	E20-1	downregulated	5307032	10.8165	10.7881	0.00167203	0.985048	-0.0737433	6825713	altPromoter|cassette-exon|strangeSplice	chr14:71005118-71005146(-)
ENSMUSG00000028465	4.56046	Tln1	E2-2	downregulated	4343823	4.6768	8.92909	0.000141174	0.969225	-0.0604633	6921162	alt-C-term	chr4:43572227-43572255(-)
ENSMUSG00000001127	4.55384	Araf	E11-2	downregulated	5444233	7.94594	12.3917	9.9954e-05	0.939399	-0.0469083	7010347	bleedingExon|exon-region-exclusion|exon-region-exclusion	chrX:20431323-20431385(+)
ENSMUSG00000037608	4.53103	Bclaf1	I10-1	downregulated	4566743	6.50775	9.36627	0.00108568	0.985048	-0.109863	6766380		chr10:20052068-20052143(+)
ENSMUSG00000026806	4.51791	Ddx31	I19-1	downregulated	5551327	5.48995	6.08283	0.00228948	0.985048	0.117031	6875974		chr2:28737663-28737879(+)
ENSMUSG00000030314	4.46098	Atg7	I2-1	downregulated	5422248	4.81561	8.26743	0.000850248	0.985048	0.0185733	6949160		chr6:114597148-114597472(+)
ENSMUSG00000031273	4.43982	Col4a6	E21-3	downregulated	4871333	7.06476	6.56829	0.000971842	0.985048	-0.291072	7019833		chrX:137638333-137638357(-)
ENSMUSG00000038916	4.42844	6330407J23Rik	I1-1	downregulated	5217117	5.85339	7.75728	0.00184339	0.985048	0.0358767	6766862		chr10:28866182-28866307(+)
ENSMUSG00000044534	4.41355	Ccbp2	I2-1	downregulated	5361856	5.4181	7.64614	0.000239884	0.985048	-0.542323	6993025		chr9:121815425-121815450(+)
ENSMUSG00000079435	4.35664	Rpl36a	E1-1	downregulated	4929667	5.50757	12.445	0.000829778	0.985048	0.165593	7013880		chrX:131120217-131120254(+)
ENSMUSG00000022305	4.33457	Lrp12	E7-3	downregulated	4800874	8.96295	10.0373	0.000105831	0.939399	0.167433	6835222	alternative_polyA	chr15:39702666-39702742(-)
ENSMUSG00000041303	4.32061	Gtf3c3	I13-2	downregulated	5571794	10.3872	8.03514	0.00409029	0.985048	-0.0940255	6758701		chr1:54464921-54465322(-)
ENSMUSG00000022521	4.30498	Crebbp	I16-1	downregulated	4406093	6.18792	10.0951	0.00333015	0.985048	0.00499753	6843630		chr16:4113650-4114594(-)
ENSMUSG00000025372	4.26435	Baiap2	I17-3	downregulated	4893534	8.97391	11.4055	0.00404201	0.985048	0.0303078	6785399		chr11:119866984-119867577(+)
ENSMUSG00000020105	4.15224	Lrig3	I1-4	downregulated	5159727	6.68679	6.29132	0.00196492	0.985048	-0.0788893	6771476		chr10:125404288-125404438(+)
ENSMUSG00000042082	4.12479	Arsb	I7-18	downregulated	5094026	5.91704	10.1713	0.00132041	0.985048	-0.135413	6809030		chr13:94686359-94686585(+)
ENSMUSG00000032064	4.10628	Dixdc1	I20-5	downregulated	4748812	8.91765	9.02371	0.000295565	0.985048	-0.159804	6995521		chr9:50486003-50486127(-)
ENSMUSG00000020519	4.08861	Sap30l	I1-6	downregulated	4981184	6.2188	8.39788	0.000268853	0.985048	-0.0411892	6781215		chr11:57616990-57617064(+)
ENSMUSG00000057182	3.98422	Scn3a	E18-2	downregulated	4677477	8.21442	9.02299	0.00134473	0.985048	0.03509	6887324		chr2:65331215-65332186(-)
ENSMUSG00000027288	3.97901	Zfp106	E7-1	downregulated	4786206	5.82625	10.8813	0.002264	0.985048	0.386021	6890302	alt-N-term	chr2:120358259-120358396(-)
ENSMUSG00000035934	3.85225	Pknox2	I7-1	downregulated	4554867	5.92498	9.13101	0.00438141	0.985048	-0.0992822	6994672		chr9:36742284-36742624(-)
ENSMUSG00000025650	3.84484	Col7a1	I4-1	downregulated	5447291	6.56083	9.43906	0.00305304	0.985048	0.12889	6992378		chr9:108857404-108857431(+)
ENSMUSG00000017943	3.838	Gdap1l1	E6-4	downregulated	5546906	7.44464	9.79935	0.00422939	0.985048	0.089945	6883013	bleedingExon	chr2:163280170-163280702(+)
ENSMUSG00000015597	3.81087	Zfp318	I10-7	downregulated	4877492	7.27826	9.34609	0.00198667	0.985048	-0.072705	6850699		chr17:46556573-46556851(+)
ENSMUSG00000023075	3.77605	Akirin1	E5-6	downregulated	4539535	5.316	9.54716	0.00306817	0.985048	0.0876233	6925184		chr4:123412258-123412521(-)
ENSMUSG00000031250	3.74686	Tnmd	E3-1	downregulated	5568348	5.80347	6.16831	0.00129179	0.985048	-0.257195	7013835		chrX:130394272-130394342(+)
ENSMUSG00000054823	3.7453	Whsc1l1	I20-1	downregulated	5341377	5.63383	9.98429	6.9961e-05	0.939399	-0.133147	6974752		chr8:26809409-26809687(+)
ENSMUSG00000001127	3.72957	Araf	E16-1	downregulated	5399616	9.14482	12.3917	6.35198e-05	0.939399	-0.0469083	7010347		chrX:20435908-20435997(+)
ENSMUSG00000026707	3.71493	Nsun6	E6-1	downregulated	5124103	6.55432	6.49454	0.0043182	0.985048	-0.317882	6884892		chr2:14959822-14959848(-)
ENSMUSG00000027365	3.71451	Trpm7	I29-2	downregulated	4558876	6.72718	7.9726	0.00216575	0.985048	-0.0125167	6890645		chr2:126630092-126630127(-)
ENSMUSG00000060924	3.68978	Csmd1	I5-35	downregulated	4597694	7.54668	10.1603	0.00225036	0.985048	-0.13213	6980768		chr8:16915929-16915959(-)
ENSMUSG00000068950	3.66083	Olfr338	E1-2	downregulated	5024203	4.26732	3.71954	0.00190217	0.985048	-0.268531	6894750		chr2:36232378-36232627(+)
ENSMUSG00000045098	3.65637	Suv420h1	E13-2	downregulated	5471836	6.62	8.05489	0.00152616	0.985048	0.06688	6867598	bleedingExon	chr19:3808056-3808513(+)
ENSMUSG00000003810	3.64019	Mast2	I10-2	downregulated	4434149	6.14303	9.91746	0.000828603	0.985048	0.133235	6924784		chr4:116004203-116004417(-)
ENSMUSG00000040850	3.61243	Psme4	I43-1	downregulated	5187177	6.55451	11.1024	0.00332887	0.985048	0.0895917	6779787		chr11:30758287-30758614(+)
ENSMUSG00000030747	3.61003	Dgat2	E8-4	downregulated	4775362	10.8407	10.3735	0.00220704	0.985048	0.0483739	6969693		chr7:106302257-106302514(-)
ENSMUSG00000060992	3.59802	Copz1	I5-1	downregulated	5307169	5.97693	11.1679	0.00281493	0.985048	-0.0250183	6833503		chr15:103125248-103125393(+)
ENSMUSG00000051098	3.52608	Mblac2	I1-2	downregulated	4478121	6.9909	9.13908	0.000274121	0.985048	-0.238469	6808542		chr13:81865743-81866668(+)
ENSMUSG00000026058	3.5259	Khdrbs2	U9-3	downregulated	5021579	4.2852	7.63206	0.00235761	0.985048	0.223838	6748437		chr1:32716719-32716749(+)
ENSMUSG00000030301	3.51123	Ccdc91	I1-1	downregulated	4315417	6.41671	7.82674	0.00487151	0.985048	0.169525	6951164		chr6:147424725-147424828(+)
ENSMUSG00000002496	3.51009	Tsc2	E33-1	downregulated	5111910	9.22786	9.53071	9.7938e-05	0.939399	0.236549	6854378	cassette-exon|cassetteExon	chr17:24738367-24738391(-)
ENSMUSG00000051890	3.49095	Klhdc1	E3-1	downregulated	5577447	6.80806	7.30095	0.00129646	0.985048	-0.14558	6795779	alt-N-term	chr12:70343513-70343681(+)
ENSMUSG00000040128	3.4759	Pnrc1	I1-6	downregulated	5488836	5.41873	8.59875	0.000399826	0.985048	-0.0201848	6920663		chr4:33364893-33365002(-)
ENSMUSG00000022747	3.46317	St3gal6	E6-1	downregulated	4792843	5.66047	10.6139	0.00437861	0.985048	-0.145983	6846497	alt-N-term	chr16:58499216-58499299(-)
ENSMUSG00000020681	3.44653	Ace	E1-1	downregulated	5350847	8.73202	9.05718	0.00359135	0.985048	0.842814	6784587		chr11:105829327-105829415(+)
ENSMUSG00000035248	3.43192	Zcchc6	I16-2	downregulated	4705022	7.3614	8.57481	0.00281278	0.985048	-0.0475453	6813676		chr13:59897932-59898020(-)
ENSMUSG00000034501	3.41478	1810048J11Rik	I2-4	downregulated	4939379	7.06113	8.41419	0.00152964	0.985048	0.0745869	6795985		chr12:73647663-73647831(+)
ENSMUSG00000071064	3.37932	Zfp827	E8-1	downregulated	4573077	10.7159	9.84209	0.00065717	0.985048	0.00189667	6977491		chr8:81660475-81660561(+)
ENSMUSG00000004892	3.37692	Bcan	E12-1	downregulated	4764239	11.1234	10.1951	0.00216425	0.985048	-0.271931	6906694		chr3:87792636-87792696(-)
ENSMUSG00000074785	3.3637	Plxnc1	I23-1	downregulated	5261202	6.91197	8.21824	0.000830325	0.985048	0.233991	6776156		chr10:94270844-94271055(-)
ENSMUSG00000040165	3.35231	Cd209c	E4-4	downregulated	5560678	7.08591	5.73447	0.00280693	0.985048	0.224552	6980107	exon-region-exclusion|exon-region-exclusion	chr8:3946150-3946180(-)
ENSMUSG00000038014	3.34761	Fam120a	I12-1	downregulated	4984365	3.94723	9.4356	0.000706295	0.985048	0.0475476	6813080		chr13:48992153-48992348(-)
ENSMUSG00000035919	3.3474	Bbs9	E23-1	downregulated	4450636	11.3662	10.2678	0.00120889	0.985048	-0.132629	6987470	cassette-exon	chr9:22475235-22475393(+)
ENSMUSG00000064125	3.31038	BC068157	E1-1	downregulated	5585553	5.93004	8.02124	0.00394245	0.985048	-0.404179	6980119		chr8:4217269-4217434(-)
ENSMUSG00000083097	3.29962	Gm14494	E1-2	downregulated	4668525	10.3079	9.78566	0.00470522	0.985048	-0.0864813	6882412		chr2:153651882-153651906(+)
ENSMUSG00000005148	3.25597	Klf5	I1-1	downregulated	4521232	6.8012	9.37813	0.0023825	0.985048	0.20111	6821304		chr14:99698619-99698743(+)
ENSMUSG00000079020	3.18085	Slc45a4	E13-9	downregulated	4529395	6.99263	8.15898	0.00141424	0.985048	0.194613	6836622		chr15:73409931-73410007(-)
ENSMUSG00000073764	3.16834	Gm12888	E1-1	downregulated	4379761	4.83159	4.29049	0.00433697	0.985048	-0.284228	6925098		chr4:120997366-120997399(-)
ENSMUSG00000021061	3.15895	Spnb1	E6-1	downregulated	5067923	10.97	10.1441	0.00350681	0.985048	0.291321	6801902	alt-5'	chr12:77729882-77729957(-)
ENSMUSG00000025261	3.14021	Huwe1	I73-2	downregulated	5348770	5.04586	11.4791	0.00314607	0.985048	0.0346511	7014551		chrX:148353681-148353773(+)
ENSMUSG00000040351	3.13841	Ankib1	E5-1	downregulated	4963456	11.9772	10.1751	0.00110654	0.985048	-0.317967	6935910		chr5:3755601-3755722(-)
ENSMUSG00000043243	3.13132	Fam129c	E15-1	downregulated	4476294	7.78782	7.80866	0.00054744	0.985048	-0.147653	6977091		chr8:74131539-74131947(+)
ENSMUSG00000005621	3.11165	Zfp592	I1-3	downregulated	5304366	5.30622	8.75826	0.00142784	0.985048	0.286978	6962043		chr7:88142498-88142727(+)
ENSMUSG00000068270	3.11019	Shroom4	E3-1	downregulated	4352033	5.52202	6.38399	0.00084696	0.985048	-0.128076	7009737	alt-N-term	chrX:6097978-6098047(+)
ENSMUSG00000027180	3.07769	Fbxo3	I3-1	downregulated	5335754	7.69462	10.2328	0.00441929	0.985048	-0.0822681	6879643		chr2:103877779-103877888(+)
ENSMUSG00000031007	3.07593	Atp6ap2	I7-1	downregulated	4582028	6.30154	10.2679	0.00221222	0.985048	0.0418233	7010055		chrX:12184519-12184849(+)
ENSMUSG00000028635	3.05043	Edn2	I4-1	downregulated	5084476	5.48576	6.79849	0.00257748	0.985048	0.0813133	6916784		chr4:119837859-119837979(+)
ENSMUSG00000055799	3.04231	Tcf7l1	E12-2	downregulated	5190611	7.16537	8.01701	0.00298573	0.985048	-0.0386717	6954640		chr6:72579966-72579998(-)
ENSMUSG00000021910	3.04055	Nisch	E25-6	downregulated	5176026	8.90314	11.306	0.00252387	0.985048	-0.0970078	6823710		chr14:31984786-31984821(-)
ENSMUSG00000038564	3.02256	Ift172	E48-2	downregulated	5412688	8.13875	8.27788	0.00188871	0.985048	0.121037	6937081		chr5:31555676-31555706(-)
ENSMUSG00000031820	3.00621	5430437P03Rik	I3-2	downregulated	4572725	7.34624	9.75252	0.00265523	0.985048	-0.111989	6977067		chr8:73923397-73923424(+)
ENSMUSG00000026872	3.00341	Zeb2	I13-1	downregulated	4307576	5.09333	10.6759	0.00306349	0.985048	-0.200867	6886356		chr2:44857791-44858029(-)
ENSMUSG00000038520	3.00292	Tbc1d17	I5-1	downregulated	4380707	6.78372	8.85748	0.00367824	0.985048	0.0257117	6966910		chr7:52101105-52101175(-)
ENSMUSG00000071454	2.97333	Dtnb	I12-2	downregulated	5509116	3.7005	10.5531	0.00254987	0.985048	-0.151669	6792943		chr12:3727813-3728053(+)
ENSMUSG00000042066	2.94647	Tmcc2	I8-1	downregulated	4944176	7.50272	9.86998	0.000362634	0.985048	0.04493	6762217		chr1:134254694-134254919(-)
ENSMUSG00000030166	2.92716	Rad52	E8-1	downregulated	5590778	12.0698	8.22321	0.00460289	0.985048	-0.0722611	6949509		chr6:119870849-119871037(+)
ENSMUSG00000039166	2.92416	Akap7	E10-1	downregulated	4525593	8.17052	9.0451	0.00460944	0.985048	-0.498061	6772829	alt-N-term	chr10:24940418-24940534(-)
ENSMUSG00000026202	2.91969	Tuba4a	E5-6	downregulated	5432821	11.0889	12.3872	0.00434392	0.985048	-0.162489	6759782	alternative_polyA	chr1:75211562-75212059(-)
ENSMUSG00000001127	2.90009	Araf	I11-1	downregulated	5497703	8.58031	12.3917	0.00018058	0.985048	-0.0469083	7010347		chrX:20432815-20433455(+)
ENSMUSG00000001127	2.87775	Araf	E12-1	downregulated	4360970	7.77971	12.3917	0.00152506	0.985048	-0.0469083	7010347	cassette-exon|cassetteExon	chrX:20434539-20434647(+)
ENSMUSG00000004892	2.86393	Bcan	E13-1	downregulated	5544390	10.2198	10.1951	0.00271478	0.985048	-0.271931	6906694		chr3:87792280-87792355(-)
ENSMUSG00000022962	2.85985	Gart	I2-5	downregulated	5267198	5.34222	8.96584	0.00113746	0.985048	0.125951	6847894		chr16:91671193-91671309(-)
ENSMUSG00000086308	2.83115	G630016G05Rik	E4-1	downregulated	5417231	6.85698	7.29027	0.00449268	0.985048	-0.444162	6880248	bleedingExon	chr2:115911151-115911195(+)
ENSMUSG00000079639	2.82671	Rhox4a	E3-1	downregulated	5229421	5.45238	5.71616	0.00246214	0.985048	-0.0812044	7010714		chrX:34808578-34808603(+)
ENSMUSG00000079508	2.816	Apoo	I8-3	downregulated	4559377	7.72873	9.91638	4.05551e-05	0.939399	-0.0340333	7012598		chrX:91661926-91662163(+)
ENSMUSG00000022340	2.81132	Sybu	E3-1	downregulated	4481348	5.81577	8.6933	0.000322756	0.985048	0.198049	6835428	alt-C-term|altPromoter	chr15:44583864-44583994(-)
ENSMUSG00000038160	2.81004	Atg5	I1-16	downregulated	5001241	3.42656	6.84847	0.00434558	0.985048	0.158593	6767581		chr10:43997083-43997114(+)
ENSMUSG00000050463	2.80509	Krt78	E1-4	downregulated	4833453	6.31511	6.88592	0.000879135	0.985048	-0.0753483	6838695		chr15:101784304-101784432(-)
ENSMUSG00000022488	2.7915	Nckap1l	E1-2	downregulated	5110572	6.63321	7.68616	0.00376251	0.985048	-0.128145	6833513		chr15:103284319-103284407(+)
ENSMUSG00000028684	2.78611	Urod	E5-7	downregulated	4362367	6.2792	7.87856	0.00405154	0.985048	0.0616793	6924824		chr4:116663713-116663828(-)
ENSMUSG00000048833	2.78596	Slc39a9	I6-1	downregulated	4462169	7.204	9.72377	0.00364403	0.985048	0.0253211	6796408		chr12:81778015-81778098(+)
ENSMUSG00000024493	2.77834	Lars	I15-2	downregulated	4589158	6.95785	7.82811	0.000380292	0.985048	0.156348	6865022		chr18:42392326-42392720(-)
ENSMUSG00000021975	2.7736	Ints9	I10-1	downregulated	4502002	3.39301	9.75718	0.00168422	0.985048	-0.0655058	6819842		chr14:65635614-65635641(+)
ENSMUSG00000001127	2.77026	Araf	E18-1	downregulated	5230814	9.5668	12.3917	0.00427596	0.985048	-0.0469083	7010347		chrX:20437105-20437239(+)
ENSMUSG00000021496	2.76826	Pcbd2	I2-6	downregulated	4469172	6.25381	8.96165	0.00460413	0.985048	0.172198	6807266		chr13:55842426-55842673(+)
ENSMUSG00000031386	2.76637	Hcfc1	U0-1	downregulated	5125488	9.15445	9.76044	0.0011691	0.985048	0.146147	7017607		chrX:71212227-71212296(-)
ENSMUSG00000038860	2.76533	Garnl3	E5-1	downregulated	4664769	8.46173	10.2391	0.00492819	0.985048	-0.092395	6885924	alt-N-term|altPromoter	chr2:32942610-32942739(-)
ENSMUSG00000074733	2.76345	5830428H23Rik	I4-4	downregulated	4800852	5.26216	10.3448	0.000191791	0.985048	-0.641182	6874235		chr19:61195007-61195858(-)
ENSMUSG00000028041	2.75865	Adam15	E1-1	downregulated	5222127	10.9752	9.26305	0.00107478	0.985048	0.450643	6906830	alt-N-term	chr3:89153731-89153788(-)
ENSMUSG00000029723	2.75805	Tsc22d4	I2-3	downregulated	4378941	5.70789	8.09947	0.00291721	0.985048	-0.122493	6935088		chr5:138191640-138191708(+)
ENSMUSG00000047443	2.75567	Fam132b	E4-2	downregulated	4603083	6.38261	7.30488	0.000118222	0.94663	-0.202924	6751549		chr1:93266756-93266915(+)
ENSMUSG00000058756	2.74374	Thra	E17-1	downregulated	4705058	10.5917	11.521	0.00125808	0.985048	-0.566828	6784042	alt-3'	chr11:98629477-98629586(+)
ENSMUSG00000031012	2.74367	Cask	I15-2	downregulated	5068443	4.39893	10.6022	0.00244138	0.985048	-0.0274867	7015746		chrX:13154817-13155384(-)
ENSMUSG00000001323	2.72974	Srr	I8-1	downregulated	4936348	7.76674	10.2171	0.00178666	0.985048	-0.0843167	6789696		chr11:74722353-74722494(-)
ENSMUSG00000035919	2.72086	Bbs9	E24-2	downregulated	5179789	12.0486	10.2678	0.00023652	0.985048	-0.132629	6987470	cassette-exon	chr9:22483398-22483443(+)
ENSMUSG00000022892	2.71981	App	U20-1	downregulated	4780078	10.7873	12.7487	0.00258733	0.985048	-0.0868579	6847540		chr16:84953380-84954634(-)
ENSMUSG00000038717	2.70241	Atp5l	E2-1	downregulated	5269884	5.32026	7.15515	0.00091471	0.985048	-0.0335624	6995145		chr9:44724558-44724940(-)
ENSMUSG00000005417	2.69853	Mprip	I8-2	downregulated	5142886	8.98105	11.5434	0.00053256	0.985048	-0.0197642	6781372		chr11:59553231-59553853(+)
ENSMUSG00000033826	2.69698	Dnahc8	E3-1	downregulated	4846313	4.11388	5.13322	0.00284715	0.985048	0.219608	6849761		chr17:30772267-30772309(+)
ENSMUSG00000085652	2.69399	Gm11999	E4-1	downregulated	4896714	5.11865	5.00097	0.00362838	0.985048	-0.163555	6786011		chr11:11542431-11542665(-)
ENSMUSG00000036057	2.68902	Ptpn23	I1-4	downregulated	5018412	7.59648	8.86434	0.00191449	0.985048	-0.00508822	6998851		chr9:110309609-110309786(-)
ENSMUSG00000008200	2.68121	Fnbp4	I12-5	downregulated	4337641	9.68591	8.6992	0.00276163	0.985048	-0.117903	6878990		chr2:90611073-90611580(+)
ENSMUSG00000007610	2.67899	Gtpbp3	E1-1	downregulated	4821561	6.2681	8.07092	0.00252021	0.985048	-0.0882256	6977078		chr8:74012300-74012640(+)
ENSMUSG00000001089	2.66669	Luzp1	I1-8	downregulated	5555869	6.22946	7.79162	9.98454e-05	0.939399	0.056749	6917835		chr4:136046674-136046996(+)
ENSMUSG00000029072	2.66408	Tas1r3	E1-2	downregulated	4437809	6.71044	6.14206	0.00211902	0.985048	0.0148819	6927316		chr4:155237268-155237359(-)
ENSMUSG00000047129	2.65917	1700113H08Rik	E3-1	downregulated	4724574	3.81268	5.75956	0.00320065	0.985048	-0.22709	6769572		chr10:86584155-86584223(+)
ENSMUSG00000019214	2.65601	Chtf18	E8-6	downregulated	4719513	5.56101	6.33152	0.0036009	0.985048	0.206597	6854430		chr17:25860644-25860697(-)
ENSMUSG00000050994	2.64969	9130014G24Rik	E29-1	downregulated	5214380	5.17497	5.02384	0.000633489	0.985048	0.448804	6772088		chr10:10097663-10097836(-)
ENSMUSG00000015994	2.62936	Fnta	I4-1	downregulated	4308936	7.15694	8.00276	0.00479774	0.985048	0.0396844	6981188		chr8:27119872-27120097(-)
ENSMUSG00000026042	2.6168	Col5a2	I1-11	downregulated	5574925	5.42801	6.00402	0.00176559	0.985048	0.102415	6758418		chr1:45522100-45522125(-)
ENSMUSG00000070462	2.59079	Mesdc1	E1-6	downregulated	5562060	7.78071	8.31919	0.004993	0.985048	0.507603	6969014		chr7:91029138-91029546(-)
ENSMUSG00000026782	2.58791	Abi2	E6-1	downregulated	4778607	10.0218	12.207	0.00218487	0.985048	-0.0306033	6749817		chr1:60504133-60504204(+)
ENSMUSG00000014195	2.58629	Dnajc7	E6-1	downregulated	4567106	8.35328	9.77553	0.00202384	0.985048	0.0279333	6791432	cassette-exon	chr11:100458914-100459315(-)
ENSMUSG00000035919	2.57916	Bbs9	E18-1	downregulated	4551310	12.226	10.2678	0.00316166	0.985048	-0.132629	6987470		chr9:22450408-22450512(+)
ENSMUSG00000026819	2.57669	Slc25a25	I1-3	downregulated	4740672	3.56661	8.00454	0.0015693	0.985048	0.280501	6885879		chr2:32305956-32305997(-)
ENSMUSG00000056476	2.576	Med12l	E6-1	downregulated	4898090	9.7814	9.27359	0.00153659	0.985048	-0.118789	6897819		chr3:58846219-58846327(+)
ENSMUSG00000021493	2.57096	Pdlim7	E11-2	downregulated	4343112	7.59001	7.9342	0.00171852	0.985048	0.286733	6813398		chr13:55607307-55607331(-)
ENSMUSG00000027394	2.55325	Ttl	I1-1	downregulated	5485389	7.11696	11.5454	0.00030838	0.985048	0.0665133	6881114	intron-retention	chr2:128892161-128892316(+)
ENSMUSG00000039914	2.50118	Coq10a	I1-2	downregulated	4972709	9.69495	9.61563	0.00173627	0.985048	-0.00832167	6778023		chr10:127805577-127805618(-)
ENSMUSG00000029730	2.49927	Mcm7	E3-1	downregulated	5126357	7.22897	9.21991	0.00371045	0.985048	-0.0971383	6942604	alt-3'|cassette-exon	chr5:138611645-138612027(-)
ENSMUSG00000022897	2.49783	Dyrk1a	I11-1	downregulated	4972769	7.17356	10.6944	0.0028032	0.985048	-0.0554617	6843393		chr16:94904375-94904553(+)
ENSMUSG00000032299	2.49699	Commd4	I1-4	downregulated	4819076	6.51642	9.49795	0.00391695	0.985048	0.00662333	6995879		chr9:57005367-57005491(-)
ENSMUSG00000024043	2.4821	Arhgap28	I1-3	downregulated	5085213	6.00405	4.73621	0.00286298	0.985048	0.281708	6856796		chr17:68350333-68351208(-)
ENSMUSG00000028397	2.48097	Kdm4c	E2-2	downregulated	4409876	7.55841	9.3634	0.000829496	0.985048	-0.0332367	6914521	alt-N-term	chr4:73897879-73897919(+)
ENSMUSG00000035696	2.47819	Rnf38	I1-3	downregulated	4851242	7.35652	9.57677	4.20159e-05	0.939399	-0.0560211	6921211		chr4:44242581-44243079(-)
ENSMUSG00000073460	2.45814	Pnldc1	E13-1	downregulated	5549730	4.88794	6.1124	0.000902406	0.985048	0.0585538	7007877	alt-3'	chr17:13087288-13087600(-)
ENSMUSG00000020576	2.45169	Nbas	E44-1	downregulated	5210695	10.2387	8.55831	0.00210263	0.985048	-0.222033	6793498	alt-N-term	chr12:13490574-13490806(+)
ENSMUSG00000015599	2.45163	Ttbk1	I2-2	downregulated	5586553	7.37319	8.72241	0.00316125	0.985048	0.105257	6855701		chr17:46619883-46619912(-)
ENSMUSG00000001127	2.43333	Araf	E8-1	downregulated	4497662	8.533	12.3917	0.00464489	0.985048	-0.0469083	7010347		chrX:20430448-20430535(+)
ENSMUSG00000039578	2.432	Fam190a	E6-2	downregulated	4702510	5.59431	8.8675	0.000540623	0.985048	0.0327833	6946650		chr6:61520889-61521060(+)
ENSMUSG00000058761	2.43173	Rnf169	I1-6	downregulated	4766271	7.33657	9.40714	0.00499591	0.985048	0.22102	6969781		chr7:107122572-107123078(-)
ENSMUSG00000025212	2.42798	Sfxn3	E12-3	downregulated	4682611	11.279	11.1788	0.00212741	0.985048	0.0297567	6869979		chr19:45130062-45130112(+)
ENSMUSG00000082514	2.41332	Gm11452	U0-3	downregulated	4338932	6.10881	6.25947	0.00218484	0.985048	0.0301793	6882989		chr2:162733495-162733552(+)
ENSMUSG00000015027	2.41212	Galns	E3-1	downregulated	5222797	7.98897	7.16579	0.000157703	0.985048	-0.447892	6985943		chr8:125128039-125128092(-)
ENSMUSG00000022324	2.40702	Matn2	E17-1	downregulated	5297868	6.21583	7.13493	0.00157103	0.985048	-0.221656	6829659	alt-3'|altThreePrime	chr15:34362792-34362827(+)
ENSMUSG00000063884	2.407	Ptcd3	I18-1	downregulated	4608638	5.86982	9.20872	0.00266801	0.985048	0.101702	6954585		chr6:71837971-71838127(-)
ENSMUSG00000025255	2.39032	Zfhx4	I4-1	downregulated	5112286	5.48735	7.77922	0.00306574	0.985048	-0.06052	6895460		chr3:5329667-5329795(+)
ENSMUSG00000035109	2.38964	Shc4	E3-1	downregulated	5081323	6.22087	5.44897	0.00247262	0.985048	0.159534	6890611		chr2:125505823-125505886(-)
ENSMUSG00000051306	2.38602	Usp42	E16-1	downregulated	4677051	7.52789	9.15798	0.00424705	0.985048	-0.0217887	6942930		chr5:144472824-144472857(-)
ENSMUSG00000046573	2.38093	Lyrm4	I2-21	downregulated	4491796	6.6073	8.58815	0.000696314	0.985048	0.155732	6812320		chr13:36085594-36086009(-)
ENSMUSG00000021819	2.37623	2310021P13Rik	I7-1	downregulated	4396569	6.60292	10.2222	0.00262816	0.985048	0.0485757	6817368		chr14:21531592-21531674(+)
ENSMUSG00000035919	2.32669	Bbs9	E22-2	downregulated	4363553	12.547	10.2678	0.000322005	0.985048	-0.132629	6987470		chr9:22463496-22463522(+)
ENSMUSG00000020361	2.31941	Hspa4	I1-2	downregulated	5039982	8.49745	10.3621	0.00214439	0.985048	0.126082	6788264		chr11:53112898-53113017(-)
ENSMUSG00000040565	2.3158	Btaf1	I6-2	downregulated	5133300	5.40371	8.04324	0.00071026	0.985048	0.246919	6869452		chr19:37034777-37035093(+)
ENSMUSG00000025939	2.30628	Ube2w	I1-6	downregulated	5313697	6.52732	10.7203	0.0016502	0.985048	-0.0112733	6757127		chr1:16596259-16596346(-)
ENSMUSG00000070284	2.30528	Gmppb	E4-1	downregulated	4633167	7.00758	6.90837	0.00132644	0.985048	0.018438	6992306		chr9:107952458-107952560(+)
ENSMUSG00000015092	2.30469	Edf1	E4-2	downregulated	4820861	6.16718	11.1285	0.00418082	0.985048	-0.0133833	6875728	exon-region-exclusion|exon-region-exclusion	chr2:25416287-25416457(+)
ENSMUSG00000048078	2.29803	Odz4	I27-5	downregulated	4914665	8.31864	10.7404	0.00397954	0.985048	0.0341667	6962736		chr7:103959383-103959646(+)
ENSMUSG00000028082	2.28833	Sh3d19	I1-5	downregulated	4809161	7.19571	6.82607	0.00461876	0.985048	0.0634031	6898940		chr3:85855790-85856088(+)
ENSMUSG00000040865	2.2754	Ino80d	E1-1	downregulated	4810291	7.83679	9.22526	0.00305149	0.985048	0.00131714	6759243		chr1:63161044-63161245(-)
ENSMUSG00000074003	2.26688	Gucy2d	E7-1	downregulated	5592491	5.27628	7.29156	0.00348572	0.985048	0.211209	6962807		chr7:105604584-105604635(+)
ENSMUSG00000029343	2.25951	Crybb1	E6-1	downregulated	4319381	9.52727	7.88925	0.00120927	0.985048	-0.184647	6933511		chr5:112696355-112696472(+)
ENSMUSG00000055396	2.25805	D830050J10Rik	U2-1	downregulated	4445013	6.71581	6.99259	0.00112861	0.985048	-0.084365	6949221		chr6:115626889-115627652(+)
ENSMUSG00000012282	2.23113	Wnt8a	E3-1	downregulated	4375466	5.88847	6.62391	0.0020599	0.985048	-0.078495	6859946		chr18:34702526-34702634(+)
ENSMUSG00000002100	2.22935	Mybpc3	E17-1	downregulated	5245363	5.11982	6.40791	0.00251815	0.985048	-0.0487911	6879022		chr2:90964948-90965063(+)
ENSMUSG00000023353	2.2269	Agap3	I9-3	downregulated	4414501	10.0752	11.1182	0.00254684	0.985048	-0.0531683	6929297		chr5:23988606-23988974(+)
ENSMUSG00000032812	2.21045	Arap1	I30-1	downregulated	4659945	5.51391	7.91051	0.00056062	0.985048	-0.044935	6963004		chr7:108549220-108549374(+)
ENSMUSG00000021262	2.20342	Evl	E9-1	downregulated	4355692	6.9346	10.6176	0.0027063	0.985048	-0.00671583	6797917		chr12:109913611-109913725(+)
ENSMUSG00000020593	2.20136	Lpin1	I15-1	downregulated	4309140	6.51867	9.49556	0.000660057	0.985048	0.0862695	6799205		chr12:16562743-16562879(-)
ENSMUSG00000089704	2.1937	Galnt2	I1-402	downregulated	5261215	6.19568	9.75357	0.00306865	0.985048	0.0465133	6979717		chr8:126060642-126060880(+)
ENSMUSG00000022983	2.18904	Scaf4	I20-7	downregulated	5296190	7.61866	9.29809	0.000817645	0.985048	-0.0214967	6847770		chr16:90239515-90240023(-)
ENSMUSG00000071937	2.17988	Adam25	E2-3	downregulated	4394374	5.28093	5.16066	0.000517825	0.985048	-0.104054	6975642		chr8:41839021-41839052(+)
ENSMUSG00000024240	2.1778	Epc1	I3-2	downregulated	4592161	6.80864	9.51399	0.00234261	0.985048	-0.122736	6863176		chr18:6488641-6488819(-)
ENSMUSG00000048015	2.16763	Neurod4	E2-5	downregulated	5157983	5.21444	5.49437	0.000907195	0.985048	-0.357769	6778157		chr10:129706152-129706663(-)
ENSMUSG00000039542	2.16691	Ncam1	I2-8	downregulated	5209041	7.50856	11.4302	0.00391282	0.985048	-0.115075	6995454		chr9:49413499-49413940(-)
ENSMUSG00000019772	2.16369	Vip	E6-1	downregulated	4947079	6.73847	5.11597	0.00325231	0.985048	0.118062	6771858		chr10:4702469-4702540(-)
ENSMUSG00000081534	2.15528	Slc48a1	I2-1	downregulated	5466206	6.89507	11.541	0.000347619	0.985048	-0.150719	6833029		chr15:97617542-97618406(+)
ENSMUSG00000020576	2.15112	Nbas	E46-1	downregulated	5534291	8.35505	8.55831	0.00180919	0.985048	-0.222033	6793498		chr12:13520211-13520350(+)
ENSMUSG00000052369	2.14697	Tmem106c	E8-1	downregulated	4814774	7.37585	8.42368	0.000791672	0.985048	-0.265775	6833042		chr15:97800027-97800309(+)
ENSMUSG00000045671	2.13479	Spred2	I2-14	downregulated	4972693	6.85966	9.22874	0.0049203	0.985048	0.247707	6779171		chr11:19882578-19882841(+)
ENSMUSG00000042763	2.10661	Maneal	E1-1	downregulated	4773863	9.43388	10.5377	0.00487214	0.985048	-0.20518	6925247		chr4:124539264-124539361(-)
ENSMUSG00000030847	2.10311	Bag3	E4-3	downregulated	5098800	7.3662	7.3234	0.0028353	0.985048	-0.261422	6964424		chr7:135689286-135689342(+)
ENSMUSG00000024667	2.09827	Tmem216	E4-1	downregulated	4869025	6.77267	6.65549	0.00316191	0.985048	-0.0371	6871493		chr19:10629065-10629110(-)
ENSMUSG00000038119	2.09744	Cdon	E11-3	downregulated	4340608	8.10095	7.93364	0.00324407	0.985048	-0.0162667	6988112		chr9:35271748-35271811(+)
ENSMUSG00000020721	2.09619	Helz	I29-1	downregulated	4998114	6.11736	9.11846	0.00114347	0.985048	0.043775	6784714	intron-retention	chr11:107531989-107532251(+)
ENSMUSG00000085485	2.083	Gm14024	I2-11	downregulated	4689346	3.69294	4.66461	0.00497428	0.985048	0.55983	6881129		chr2:129084509-129084561(+)
ENSMUSG00000021996	2.08084	Esd	I8-2	downregulated	4625823	6.66424	9.05891	0.00473948	0.985048	0.369586	6820289		chr14:75147121-75147332(+)
ENSMUSG00000022243	2.0757	Slc45a2	E1-1	downregulated	5397371	5.3868	6.45701	0.000517768	0.985048	0.124094	6828743		chr15:10930481-10930562(+)
ENSMUSG00000071547	2.06865	Nt5dc2	E7-1	downregulated	4578875	8.24678	8.1641	0.000457594	0.985048	0.216548	6817970		chr14:31949270-31949345(+)
ENSMUSG00000055313	2.06789	Pgbd1	E6-7	downregulated	5466605	5.46501	6.33727	0.00341786	0.985048	0.149282	6811488		chr13:21514488-21514642(-)
ENSMUSG00000020456	2.0546	Ogdh	E5-1	downregulated	4876532	11.5298	11.6677	0.00111184	0.985048	0.113711	6778560	cassetteExon|mutually-exclusive-exon	chr11:6217017-6217074(+)
ENSMUSG00000003868	2.04529	Ruvbl2	E5-1	downregulated	4507686	7.15613	8.53235	0.000269682	0.985048	0.0142362	6966983		chr7:52686690-52686715(-)
ENSMUSG00000079262	2.02745	Slco1a6	E1-1	downregulated	5202700	3.79031	2.7692	6.66789e-05	0.939399	0.449045	6958043		chr6:142134621-142134652(-)
ENSMUSG00000090700	-2.00591	CT033759.1	E10-1	upregulated	5166369	4.18815	6.35619	0.000989159	0.985048	0.239788	6849891		chr17:32812671-32812700(+)
ENSMUSG00000053161	-2.00755	Wdr69	I7-1	upregulated	4382914	5.75623	4.73492	0.00308415	0.985048	0.253318	6751106		chr1:83188030-83188057(+)
ENSMUSG00000022211	-2.0106	Lrrc16b	E8-1	upregulated	5212964	9.33828	7.58883	0.00047847	0.985048	-0.00884333	6819242		chr14:56113021-56113076(+)
ENSMUSG00000052928	-2.01072	Gm672	I2-6	upregulated	5398596	5.57202	8.05224	0.00375953	0.985048	0.05044	6866747		chr18:75786821-75787006(-)
ENSMUSG00000026915	-2.01233	Strbp	I23-2	upregulated	4742591	8.42462	10.899	0.0029902	0.985048	-0.108838	6886117		chr2:37436364-37436416(-)
ENSMUSG00000031402	-2.03641	Mpp1	I5-1	upregulated	4727879	6.93733	9.85538	0.000685899	0.985048	-0.195813	7017668		chrX:72368446-72368910(-)
ENSMUSG00000036391	-2.03719	Sec24a	E3-5	upregulated	5129517	8.0706	9.36879	0.00241282	0.985048	-0.205675	6788134	bleedingExon	chr11:51555564-51556896(-)
ENSMUSG00000022822	-2.04368	Abcc5	I6-1	upregulated	4329847	8.9784	10.1031	0.0014833	0.985048	-0.213374	6844447	intron-retention	chr16:20403274-20404600(-)
ENSMUSG00000049411	-2.0602	6030446N20Rik	I13-2	upregulated	4625030	5.73189	6.68279	0.00209155	0.985048	-0.196572	6863418		chr18:12215625-12215655(-)
ENSMUSG00000031576	-2.06485	Kcnu1	E22-1	upregulated	4461312	3.1989	7.0689	0.00423497	0.985048	0.26617	6974770	cassette-exon	chr8:27022432-27022490(+)
ENSMUSG00000067341	-2.08589	H2-Eb2	E3-1	upregulated	4666618	4.25663	5.07103	0.00217559	0.985048	0.250443	6849968		chr17:34471160-34471341(+)
ENSMUSG00000052353	-2.08785	9930013L23Rik	E30-5	upregulated	5605413	6.90653	6.08746	0.00123863	0.985048	-0.0424063	6969016		chr7:91082747-91082984(-)
ENSMUSG00000038453	-2.08792	Srcin1	I20-2	upregulated	4360511	8.77108	9.81497	0.00165092	0.985048	-0.0648489	6791204		chr11:97378214-97378329(-)
ENSMUSG00000054901	-2.09	Arhgef33	E13-1	upregulated	5259473	5.85024	5.98777	0.00379129	0.985048	0.030783	6852484		chr17:80769631-80769709(+)
ENSMUSG00000019295	-2.11424	Tmem129	E1-1	upregulated	5223302	7.43666	8.82612	0.000567963	0.985048	0.0437956	6937255	alt-5'	chr5:34000213-34000257(-)
ENSMUSG00000006740	-2.11443	Kif5b	I22-1	upregulated	4601392	4.81826	11.0865	0.000736093	0.985048	-0.350971	6863158		chr18:6210593-6210659(-)
ENSMUSG00000039552	-2.13372	Rsph4a	E1-3	upregulated	5427416	6.53477	5.90877	0.00447676	0.985048	0.329782	6767068		chr10:33625294-33625407(+)
ENSMUSG00000022766	-2.13902	Serpind1	E2-2	upregulated	4997360	5.88121	7.83784	0.00425306	0.985048	-0.978418	6839737		chr16:17336404-17336445(+)
ENSMUSG00000021458	-2.15129	2010111I01Rik	I17-6	upregulated	4737340	5.20455	8.05742	4.57939e-05	0.939399	-0.189553	6807609		chr13:63381849-63382197(+)
ENSMUSG00000031221	-2.1683	Igbp1	E2-5	upregulated	5100433	8.99307	8.58145	0.00301009	0.985048	-0.413867	7012831	bleedingExon	chrX:97694425-97694607(+)
ENSMUSG00000018819	-2.17976	Lsp1	E2-1	upregulated	5244681	6.79094	6.80747	0.00481089	0.985048	-0.3697	6965268	alt-N-term	chr7:149658120-149658145(+)
ENSMUSG00000022601	-2.18394	Rpl24	E3-1	upregulated	4487777	8.26606	8.86206	0.00182265	0.985048	0.215927	6841693		chr16:55969641-55969739(+)
ENSMUSG00000042105	-2.20054	Inpp5f	E23-1	upregulated	5507758	11.2604	9.30142	0.00049719	0.985048	-0.493348	6964428		chr7:135838084-135838293(+)
ENSMUSG00000039021	-2.20129	Ttc16	I8-2	upregulated	4735847	4.78341	6.32559	0.00478141	0.985048	0.125094	6885909	intron-retention	chr2:32624913-32625415(-)
ENSMUSG00000025261	-2.21782	Huwe1	I89-4	upregulated	4759111	5.33571	11.4791	0.000758322	0.985048	0.0346511	7014551		chrX:148368323-148368402(+)
ENSMUSG00000058976	-2.23605	Usp17l5	I1-2	upregulated	4873517	3.42541	6.32759	0.00409189	0.985048	-0.515541	6963102		chr7:110565157-110565184(+)
ENSMUSG00000000131	-2.25139	Xpo6	E9-1	upregulated	5384619	9.45908	10.5285	0.00107826	0.985048	-0.0393	6971245	cassette-exon|cassetteExon	chr7:133293019-133293050(-)
ENSMUSG00000024913	-2.25946	Lrp5	E5-1	upregulated	4561942	6.31247	7.21808	0.00102637	0.985048	0.200521	6870931		chr19:3649439-3649535(-)
ENSMUSG00000027784	-2.26212	Ppm1l	I2-6	upregulated	5219912	5.33387	8.93319	0.0044058	0.985048	-0.219533	6898276		chr3:69170727-69171032(+)
ENSMUSG00000026368	-2.26322	F13b	E13-1	upregulated	4748603	4.21872	5.65472	0.00439417	0.985048	0.007985	6753594		chr1:141419957-141419994(+)
ENSMUSG00000045038	-2.27488	Prkce	I3-28	upregulated	4779453	6.82755	12.3368	0.00194269	0.985048	-0.08328	6852829		chr17:86634928-86635103(+)
ENSMUSG00000028890	-2.27827	Mtf1	E12-1	upregulated	4966711	7.98271	9.194	0.000433697	0.985048	0.0786789	6917046		chr4:124519775-124519821(+)
ENSMUSG00000027273	-2.27927	Snap25	I4-3	upregulated	5174476	10.4178	12.1701	0.00449932	0.985048	-0.0719856	6881488		chr2:136590886-136591144(+)
ENSMUSG00000029775	-2.27984	Klhdc10	E3-3	upregulated	5487585	8.1196	9.83168	0.000405298	0.985048	0.0747933	6945090	cassette-exon|cassetteExon	chr6:30377729-30377792(+)
ENSMUSG00000037287	-2.2885	Tbcel	I11-6	upregulated	5228990	6.39676	9.83948	0.00341668	0.985048	-0.125507	6994942		chr9:42225063-42225489(-)
ENSMUSG00000053399	-2.29695	Adamts18	E15-1	upregulated	4380384	5.27863	6.23451	0.000746196	0.985048	-0.207671	6985481	cassette-exon	chr8:116262735-116262819(-)
ENSMUSG00000023216	-2.30292	Epb4.2	E5-1	upregulated	5351855	3.6725	6.49439	0.00140444	0.985048	0.12333	6890356		chr2:120855718-120855800(-)
ENSMUSG00000028525	-2.3227	Pde4b	E1-1	upregulated	4765932	8.04457	11.2746	0.000482149	0.985048	-0.105632	6915856	altPromoter	chr4:101760247-101760344(+)
ENSMUSG00000038119	-2.32406	Cdon	E23-2	upregulated	4520891	7.24234	7.93364	0.00243025	0.985048	-0.0162667	6988112	alt-3'	chr9:35312107-35312422(+)
ENSMUSG00000001105	-2.32902	Ift20	I2-2	upregulated	5037054	6.10821	11.7178	0.0039809	0.985048	0.0384444	6782708		chr11:78351540-78351907(+)
ENSMUSG00000028926	-2.337	Cdk14	I3-15	upregulated	4838711	4.14972	9.24602	0.00105578	0.985048	-0.179962	6935970		chr5:5304443-5304857(-)
ENSMUSG00000091878	-2.3822	AC104908.1	E2-2	upregulated	5483594	5.77285	5.84771	0.0046467	0.985048	0.564528	6904601		chr3:41293431-41293455(-)
ENSMUSG00000020176	-2.38311	Grb10	E2-1	upregulated	4611054	5.97349	9.02971	0.00318015	0.985048	-0.146761	6786046	alt-N-term	chr11:11937906-11937953(-)
ENSMUSG00000029797	-2.39272	Sspo	E74-2	upregulated	5556540	5.40047	6.52089	0.00185964	0.985048	0.0883455	6946002		chr6:48435403-48435476(+)
ENSMUSG00000042105	-2.39305	Inpp5f	E23-4	upregulated	5132656	10.6538	9.30142	0.00107195	0.985048	-0.493348	6964428		chr7:135838709-135838834(+)
ENSMUSG00000026579	-2.3955	F5	E20-1	upregulated	5553262	6.54753	7.02299	0.00274948	0.985048	0.99342	6754691		chr1:166139076-166139134(+)
ENSMUSG00000022822	-2.40913	Abcc5	E1-1	upregulated	4515760	8.86692	10.1031	0.000444035	0.985048	-0.213374	6844447	alt-N-term	chr16:20426342-20426447(-)
ENSMUSG00000040374	-2.41905	Pxmp3	E7-3	upregulated	5488074	5.26161	8.54669	0.00393954	0.985048	0.00532833	6902976		chr3:5560235-5560427(-)
ENSMUSG00000001211	-2.45077	Agpat3	E3-1	upregulated	5331050	8.74353	10.2347	0.0022645	0.985048	-0.0196478	6775250	alt-3'|cassette-exon|altPromoter	chr10:77814394-77814453(-)
ENSMUSG00000035314	-2.45238	Gdpd5	E13-1	upregulated	5246162	8.85353	9.25279	0.00171588	0.985048	0.200868	6962876		chr7:106602991-106603125(+)
ENSMUSG00000043398	-2.45336	Gpr135	E1-3	upregulated	5287952	7.1943	7.34346	0.00179666	0.985048	0.119804	6801631		chr12:73171002-73171102(-)
ENSMUSG00000027490	-2.45521	E2f1	E7-4	upregulated	4822224	4.70703	8.24719	0.00360383	0.985048	0.0297442	6892307		chr2:154385158-154385235(-)
ENSMUSG00000010025	-2.45635	Aldh3a2	E11-1	upregulated	4900289	7.75208	8.67192	0.00324852	0.985048	-0.100527	6788815	alt-C-term	chr11:61061080-61061616(-)
ENSMUSG00000022756	-2.48767	Slc7a4	E1-1	upregulated	4772129	7.08315	8.60122	0.00206879	0.985048	-0.237121	6844283		chr16:17577036-17577071(-)
ENSMUSG00000041740	-2.50633	Rnf10	I3-1	upregulated	5077290	6.87599	11.3278	0.000265284	0.985048	0.06375	6941277		chr5:115707406-115707761(-)
ENSMUSG00000086765	-2.51539	Gm11827	E4-1	upregulated	4787985	4.38501	4.39389	0.00308621	0.985048	0.443139	6911674		chr4:11053145-11053461(+)
ENSMUSG00000021460	-2.5174	Auh	E7-1	upregulated	4963712	3.86894	10.54	0.00339769	0.985048	-0.0416	6813242	alt-3'|cassette-exon|alt-C-term	chr13:53004685-53004726(-)
ENSMUSG00000044288	-2.52752	Cnr1	E3-1	upregulated	5107360	8.49818	10.8645	6.59744e-06	0.939399	0.358304	6912565	cassette-exon	chr4:34022193-34022291(+)
ENSMUSG00000027177	-2.52806	Hipk3	E2-3	upregulated	4362125	6.60779	10.1743	0.00464127	0.985048	-0.0343489	6889330	alt-N-term	chr2:104333385-104333439(-)
ENSMUSG00000089689	-2.54777	Gm4982	E1-5	upregulated	5349733	3.7647	4.09015	0.00134396	0.985048	0.519078	6907077		chr3:94040764-94040806(-)
ENSMUSG00000066607	-2.55266	6030419C18Rik	I1-1	upregulated	4678357	9.20189	9.9206	0.00195576	0.985048	0.0777367	6989473		chr9:58338203-58338282(+)
ENSMUSG00000031099	-2.57427	Smarca1	E27-2	upregulated	4321146	6.44442	8.44002	0.000741697	0.985048	-0.420794	7016666	bleedingExon	chrX:45162891-45163204(-)
ENSMUSG00000030761	-2.5752	Myo7a	E50-1	upregulated	4390277	6.42484	7.45894	0.00228329	0.985048	0.506258	6969639		chr7:105203387-105203469(-)
ENSMUSG00000022822	-2.5801	Abcc5	I7-1	upregulated	5605522	9.68518	10.1031	0.00205303	0.985048	-0.213374	6844447	intron-retention	chr16:20401295-20402132(-)
ENSMUSG00000047045	-2.59688	Tmem164	E2-3	upregulated	5114730	7.4939	9.54066	0.00250554	0.985048	-0.0598267	7014222	exon-region-exclusion|exon-region-exclusion	chrX:139116513-139116726(+)
ENSMUSG00000029420	-2.59871	Rimbp2	I21-3	upregulated	4514320	9.56009	10.0013	0.0016611	0.985048	0.197914	6942121		chr5:129266735-129266817(-)
ENSMUSG00000025573	-2.62934	6030468B19Rik	I5-1	upregulated	5507560	5.43897	7.59263	0.00287354	0.985048	-0.23537	6785297		chr11:117668256-117668401(+)
ENSMUSG00000022750	-2.65008	Klhl22	I8-2	upregulated	4462370	6.4654	10.6685	0.00263918	0.985048	-0.00345889	6839769		chr16:17792383-17792486(+)
ENSMUSG00000030172	-2.6504	Erc1	E6-1	upregulated	4875636	5.53746	8.52043	0.00184488	0.985048	-0.136392	6956926	cassette-exon|cassetteExon	chr6:119728011-119728075(-)
ENSMUSG00000042105	-2.6557	Inpp5f	E21-1	upregulated	4414633	9.58635	9.30142	0.000537191	0.985048	-0.493348	6964428		chr7:135835793-135835886(+)
ENSMUSG00000036615	-2.65862	Rfxap	I1-1	upregulated	4761742	6.90877	7.77447	0.000945541	0.985048	0.0252367	6905200		chr3:54610683-54610848(-)
ENSMUSG00000029823	-2.65888	Luc7l2	E4-2	upregulated	4497323	10.3133	9.25957	0.00245728	0.985048	0.0381633	6945555	alt-3'|cassette-exon|cassetteExon	chr6:38515656-38515721(+)
ENSMUSG00000019802	-2.67157	Sec63	I19-6	upregulated	4955457	4.93073	7.99378	0.00498675	0.985048	0.0257833	6767464		chr10:42543447-42543577(+)
ENSMUSG00000017929	-2.67545	B4galt5	I1-4	upregulated	5276627	5.58334	10.5447	0.000966464	0.985048	0.000826667	6893165		chr2:167165090-167165302(-)
ENSMUSG00000022389	-2.70153	Tef	E1-1	upregulated	5316743	5.68348	9.71116	0.000109912	0.939399	-0.311426	6832132		chr15:81632876-81632989(+)
ENSMUSG00000044288	-2.70959	Cnr1	E2-2	upregulated	4834561	9.86991	10.8645	0.00269928	0.985048	0.358304	6912565	cassette-exon	chr4:34013590-34013655(+)
ENSMUSG00000049401	-2.7097	Ogfr	I3-1	upregulated	5116103	6.96269	9.18326	0.00447363	0.985048	0.0459792	6884183		chr2:180326433-180327099(+)
ENSMUSG00000027281	-2.72468	2210009G21Rik	U0-2	upregulated	5039808	4.28463	7.97059	0.00402153	0.985048	-0.358832	6881499		chr2:136701811-136702122(+)
ENSMUSG00000005442	-2.72539	Cic	I3-2	upregulated	4873917	5.9785	9.32595	0.00189069	0.985048	-0.07512	6959198		chr7:26060121-26060431(+)
ENSMUSG00000042105	-2.72922	Inpp5f	E23-3	upregulated	5595921	11.1614	9.30142	0.0010481	0.985048	-0.493348	6964428		chr7:135838547-135838693(+)
ENSMUSG00000052214	-2.73783	Opa3	E3-2	upregulated	5078643	4.7356	8.06044	0.00238883	0.985048	0.0184028	6958995	alt-C-term	chr7:19841074-19841157(+)
ENSMUSG00000021265	-2.76368	Slc25a29	E2-4	upregulated	5133303	6.36137	6.61488	0.00473016	0.985048	-0.0652617	6803596		chr12:110069180-110069303(-)
ENSMUSG00000035126	-2.76715	Wdr78	E17-1	upregulated	4854017	4.53338	7.22512	0.00173662	0.985048	-0.753365	6924017	alt-N-term	chr4:102714019-102714111(-)
ENSMUSG00000023960	-2.76769	Enpp5	I3-1	upregulated	5175351	11.4427	11.9726	0.000851922	0.985048	-0.0569567	6850552	intron-retention	chr17:44219902-44220441(+)
ENSMUSG00000047123	-2.77861	Ticam1	E2-20	upregulated	4764558	5.03547	6.5056	0.000955232	0.985048	0.10496	6856215		chr17:56408855-56408884(-)
ENSMUSG00000030854	-2.82487	Ptpn5	I2-1	upregulated	5250064	7.88474	11.8744	0.0033072	0.985048	0.143574	6967109		chr7:54388304-54388399(-)
ENSMUSG00000081557	-2.85207	Gm5697	E1-10	upregulated	4406281	5.44175	6.08018	0.00403114	0.985048	0.317727	6757556		chr1:28858082-28858108(-)
ENSMUSG00000044288	-2.87611	Cnr1	E4-1	upregulated	4523280	8.97937	10.8645	0.000482287	0.985048	0.358304	6912565	cassette-exon	chr4:34022906-34022954(+)
ENSMUSG00000026950	-2.87829	Neb	E151-1	upregulated	4305470	3.84356	4.97037	0.0016959	0.985048	-0.0196937	6886729	cassette-exon|cassetteExon	chr2:52012842-52012881(-)
ENSMUSG00000025475	-2.89367	Gpr123	I6-2	upregulated	5038049	6.41626	8.36375	0.00275602	0.985048	-0.098925	6965069		chr7:147051421-147051512(+)
ENSMUSG00000023353	-2.90558	Agap3	E19-1	upregulated	4808419	8.27257	11.1182	0.00257055	0.985048	-0.0531683	6929297		chr5:24007261-24007420(+)
ENSMUSG00000027824	-2.93286	Vmn2r1	U6-1	upregulated	4981869	3.24744	5.92867	0.000445122	0.985048	-0.494346	6898037		chr3:63909381-63909434(+)
ENSMUSG00000032643	-2.94445	Fhl3	U6-2	upregulated	4676671	4.99117	7.51952	0.00477509	0.985048	-0.206728	6917037		chr4:124387506-124387784(+)
ENSMUSG00000056553	-2.95174	Ptprn2	I14-12	upregulated	5588106	5.77199	11.8564	0.00490705	0.985048	0.00824111	6798406		chr12:118333006-118333217(+)
ENSMUSG00000059040	-2.96144	Gm5506	E1-1	upregulated	4847283	2.9844	11.0339	0.0030553	0.985048	-0.0428567	6860710		chr18:48205009-48205086(+)
ENSMUSG00000059182	-2.96192	Skap2	I4-10	upregulated	5340619	3.50485	7.38658	0.00207047	0.985048	-0.101651	6953587		chr6:51913850-51914049(-)
ENSMUSG00000032827	-2.97005	Ppp1r9a	I11-7	upregulated	4412433	7.13816	11.0252	0.00131537	0.985048	-0.106506	6943862		chr6:5040162-5040283(+)
ENSMUSG00000038534	-2.97917	Osbpl7	I11-1	upregulated	5334968	6.00761	8.70949	0.000250969	0.985048	-0.0996133	6783886		chr11:96919297-96919390(+)
ENSMUSG00000022892	-2.98245	App	E7-1	upregulated	4418953	12.2328	12.7487	0.00177963	0.985048	-0.0868579	6847540	cassette-exon|cassetteExon	chr16:85043952-85043985(-)
ENSMUSG00000034858	-2.98547	BC031353	E4-2	upregulated	5084391	4.8214	9.4153	0.000823776	0.985048	-0.14903	6990525	alt-C-term	chr9:74801885-74802633(+)
ENSMUSG00000042997	-3.00404	Nhlrc3	E7-8	upregulated	4629998	5.91011	6.88661	0.00218678	0.985048	-0.10746	6905129		chr3:53252903-53254483(-)
ENSMUSG00000058440	-3.00912	Nrf1	E18-3	upregulated	4429128	4.55372	7.93247	0.00199561	0.985048	0.005146	6945078		chr6:30094940-30095135(+)
ENSMUSG00000052676	-3.01513	Zmat1	E1-1	upregulated	4445524	7.15902	7.57166	0.00195659	0.985048	-0.48322	7019547	alt-N-term	chrX:131558645-131559813(-)
ENSMUSG00000036641	-3.05203	Ccdc148	I2-10	upregulated	5008223	2.51349	6.9005	0.00368303	0.985048	-0.558148	6886981		chr2:58907105-58907437(-)
ENSMUSG00000037822	-3.06399	1110003E01Rik	E1-1	upregulated	5349664	8.83537	12.3292	0.00218913	0.985048	0.0531233	6938710	alt-N-term	chr5:65928072-65928187(-)
ENSMUSG00000036552	-3.06557	2210404J11Rik	I21-5	upregulated	4378138	6.201	7.65902	0.00411693	0.985048	-0.0400989	6848819		chr17:15209692-15210009(+)
ENSMUSG00000021198	-3.07084	Unc79	E53-2	upregulated	5442233	7.54363	9.98994	0.00475468	0.985048	0.0470882	6797517		chr12:104421776-104421822(+)
ENSMUSG00000030279	-3.07505	5730419I09Rik	E25-3	upregulated	4810084	6.93545	10.3247	0.00140851	0.985048	-0.031783	6958080		chr6:142970030-142970187(-)
ENSMUSG00000081436	-3.07858	Gm5912	E1-6	upregulated	5597905	4.63803	7.55254	0.00485268	0.985048	0.0322838	6978384		chr8:98102241-98102577(+)
ENSMUSG00000061046	-3.07905	Haghl	E3-2	upregulated	4627256	8.66248	9.99985	0.00202905	0.985048	-0.0456883	6854433	exon-region-exclusion|exon-region-exclusion	chr17:25921348-25921398(-)
ENSMUSG00000028565	-3.08442	Nfia	I1-4	upregulated	5268991	4.91788	10.3715	0.00418	0.985048	-0.0394867	6915619		chr4:97250188-97250296(+)
ENSMUSG00000032803	-3.12924	Cdv3	E2-3	upregulated	4819492	5.17219	10.1718	0.000630755	0.985048	-0.0522892	6998401	altPromoter|exon-region-exclusion|exon-region-exclusion	chr9:103266551-103266622(-)
ENSMUSG00000032340	-3.13125	Neo1	I5-2	upregulated	4380948	4.53359	10.672	0.000802913	0.985048	-0.216768	6996018		chr9:58820296-58820490(-)
ENSMUSG00000049100	-3.13298	Pcdh10	E8-2	upregulated	5484721	6.92416	10.7175	0.00309685	0.985048	0.0288311	6897167		chr3:45239015-45240191(+)
ENSMUSG00000039285	-3.18389	Azi2	I10-5	upregulated	4405087	9.05846	9.36502	0.00493306	0.985048	0.0243011	6992830		chr9:117976688-117977581(+)
ENSMUSG00000058661	-3.18556	Gm10046	E2-6	upregulated	4592282	6.31894	5.91036	0.00400005	0.985048	0.0236172	6945459		chr6:36908750-36908774(+)
ENSMUSG00000070883	-3.21482	4930578N16Rik	I7-2	upregulated	5328315	3.34077	5.3525	0.00208664	0.985048	-0.0728152	6887545		chr2:69599981-69600361(-)
ENSMUSG00000020564	-3.23574	Atxn7l1	I10-12	upregulated	4370441	3.83346	9.73601	5.17406e-05	0.939399	-0.104393	6794331		chr12:34021924-34021966(+)
ENSMUSG00000055415	-3.24754	Atp10b	I13-1	upregulated	4894656	3.64366	7.19179	0.000201654	0.985048	-0.177023	6780349		chr11:43026687-43026790(+)
ENSMUSG00000026811	-3.25482	St6galnac6	E10-2	upregulated	4384795	6.11308	11.3519	0.00455813	0.985048	0.0307733	6876210		chr2:32475018-32475049(+)
ENSMUSG00000024193	-3.25833	Phf1	I10-1	upregulated	4895171	6.89296	7.71464	0.00394227	0.985048	0.142937	6849474		chr17:27073887-27073982(+)
ENSMUSG00000030703	-3.26336	Gdpd3	E5-1	upregulated	4487603	4.95732	5.94706	0.00230249	0.985048	2.02634	6964245		chr7:133911081-133911172(+)
ENSMUSG00000004892	-3.28593	Bcan	I8-1	upregulated	4688437	8.96242	10.1951	0.00125858	0.985048	-0.271931	6906694		chr3:87796779-87796919(-)
ENSMUSG00000028249	-3.29317	Sdcbp	E8-1	upregulated	5164248	6.10463	10.811	0.00314209	0.985048	-0.109818	6911439	alt-C-term	chr4:6311313-6311343(+)
ENSMUSG00000010025	-3.29697	Aldh3a2	I10-1	upregulated	5021871	4.93245	8.67192	6.00856e-05	0.939399	-0.100527	6788815		chr11:61062177-61062363(-)
ENSMUSG00000020349	-3.31528	Ppp2ca	E7-4	upregulated	4989869	7.75253	12.6923	0.00355753	0.985048	0.0362658	6780907		chr11:51936249-51936753(+)
ENSMUSG00000069170	-3.32541	Gpr98	E28-3	upregulated	5346339	4.09875	4.43008	0.000974283	0.985048	0.153325	6814656		chr13:81672030-81672090(-)
ENSMUSG00000039648	-3.32973	Ccbl1	E4-1	upregulated	5561200	4.93251	8.59179	0.00493107	0.985048	0.175987	6885751	cassette-exon|cassetteExon	chr2:30047747-30047804(-)
ENSMUSG00000020220	-3.37408	Vps13d	I60-3	upregulated	4647981	5.27826	8.99072	0.000172469	0.985048	-0.0431372	6927999		chr4:144649058-144649435(-)
ENSMUSG00000039701	-3.39009	Usp53	I10-1	upregulated	5253681	3.71737	8.48355	0.00172334	0.985048	-0.169503	6908919	intron-retention	chr3:122659806-122660376(-)
ENSMUSG00000027422	-3.40158	Rrbp1	I25-1	upregulated	4941035	6.21564	7.62632	0.000514162	0.985048	-0.0820067	6891648		chr2:143778063-143778210(-)
ENSMUSG00000062169	-3.4206	Cnih4	E4-1	upregulated	4523855	5.1432	9.80723	0.00398638	0.985048	-0.0781417	6755729		chr1:183085879-183085973(+)
ENSMUSG00000035021	-3.46704	Baz1a	E16-1	upregulated	5239850	4.89229	6.3363	0.00365396	0.985048	-0.0221723	6800908		chr12:56022026-56022058(-)
ENSMUSG00000042567	-3.47604	Nek10	E30-4	upregulated	4732922	4.00164	5.59489	0.00161272	0.985048	-0.278723	6817079		chr14:15803727-15803865(+)
ENSMUSG00000035258	-3.52068	Abi3bp	E19-1	upregulated	4441400	4.15311	7.90886	0.00230091	0.985048	-1.20316	6841712		chr16:56610968-56611054(+)
ENSMUSG00000023960	-3.56022	Enpp5	I3-2	upregulated	5157537	11.8357	11.9726	0.000770174	0.985048	-0.0569567	6850552	intron-retention	chr17:44220761-44221957(+)
ENSMUSG00000049583	-3.5655	Grm5	I11-1	upregulated	5435935	8.78138	12.121	0.00228827	0.985048	-0.0730187	6962363		chr7:95265724-95265843(+)
ENSMUSG00000041852	-3.56908	Tcf20	E1-1	upregulated	4956626	8.54245	10.2809	0.0018355	0.985048	-0.0308433	6837412		chr15:82742440-82742569(-)
ENSMUSG00000026721	-3.58981	Rabgap1l	E22-2	upregulated	5069333	6.02758	9.8369	0.0024516	0.985048	-0.0417804	6763495	cassette-exon	chr1:162239139-162239178(-)
ENSMUSG00000052698	-3.61618	Tln2	E55-1	upregulated	5260870	9.02787	8.94737	0.00294337	0.985048	0.0474714	6996451		chr9:67110761-67110787(-)
ENSMUSG00000000530	-3.61664	Acvrl1	E2-1	upregulated	5483385	3.2061	10.0859	0.000120837	0.94663	-0.689041	6833305		chr15:100959306-100959355(+)
ENSMUSG00000063297	-3.68577	Luzp2	I5-8	upregulated	5304512	4.01203	10.5497	0.00446197	0.985048	-0.0561224	6960824		chr7:62362395-62362488(+)
ENSMUSG00000031636	-3.68747	Pdlim3	E8-2	upregulated	5025840	3.08829	6.15776	0.00240674	0.985048	0.395887	6975871	alternative_polyA	chr8:47004652-47004852(+)
ENSMUSG00000031601	-3.71224	Cnot7	I6-4	upregulated	5359796	9.68327	9.44084	0.00115851	0.985048	-0.476298	6981865		chr8:41587643-41587676(-)
ENSMUSG00000030621	-3.71227	Me3	E11-2	upregulated	4527464	6.551	10.5068	0.000675766	0.985048	-0.274803	6962467	bleedingExon	chr7:96955306-96955597(+)
ENSMUSG00000050812	-3.73178	AI314180	I3-4	upregulated	5020873	6.47598	9.60046	0.00494704	0.985048	-0.24953	6922021		chr4:58905775-58905960(-)
ENSMUSG00000038024	-3.73418	Dennd4c	I1-10	upregulated	5486396	2.64211	7.90451	0.00223654	0.985048	-0.273555	6915133		chr4:86415507-86415639(+)
ENSMUSG00000026317	-3.73473	Cln8	E7-8	upregulated	5344856	6.21155	9.52206	0.00108232	0.985048	0.00444	6974250		chr8:14898985-14900287(+)
ENSMUSG00000030703	-3.74178	Gdpd3	E8-1	upregulated	5172938	5.24958	5.94706	0.00226774	0.985048	2.02634	6964245		chr7:133914502-133914559(+)
ENSMUSG00000020456	-3.77394	Ogdh	E4-2	upregulated	5378617	9.60114	11.6677	0.0010622	0.985048	0.113711	6778560	alt-5'|cassette-exon|alt-5'|mutually-exclusive-exon|altFivePrime|cassetteExon|mutually-exclusive-exon|alt-5'	chr11:6216808-6216836(+)
ENSMUSG00000050953	-3.84972	Gja1	E1-10	upregulated	5180300	2.02793	6.48443	3.90908e-05	0.939399	0.0316411	6768014		chr10:56100399-56100528(+)
ENSMUSG00000055319	-3.85127	Sec23ip	E19-3	upregulated	5585317	7.30192	6.60964	0.00136745	0.985048	0.38914	6964433		chr7:135927542-135927671(+)
ENSMUSG00000030703	-3.86344	Gdpd3	E9-1	upregulated	4718693	3.9502	5.94706	0.000296464	0.985048	2.02634	6964245		chr7:133914681-133914715(+)
ENSMUSG00000040549	-3.88081	Ckap5	I19-1	upregulated	5143334	4.76716	9.44801	0.00285393	0.985048	-0.160274	6879064		chr2:91414560-91414970(+)
ENSMUSG00000052373	-3.88124	Mpp3	E20-3	upregulated	4656770	4.8986	7.1937	0.00261016	0.985048	0.46426	6791529		chr11:101861876-101861916(-)
ENSMUSG00000030560	-3.88864	Ctsc	E9-2	upregulated	5234570	5.23107	7.01209	0.00233475	0.985048	0.09391	6962376		chr7:95458423-95458706(+)
ENSMUSG00000030761	-3.89044	Myo7a	E13-1	upregulated	4789267	4.09763	7.45894	0.00355178	0.985048	0.506258	6969639		chr7:105245924-105246018(-)
ENSMUSG00000029422	-3.89319	Rsrc2	E2-1	upregulated	5526066	4.67208	7.19336	0.00310713	0.985048	0.0273758	6941837	cassette-exon|cassetteExon	chr5:124196799-124196870(-)
ENSMUSG00000027010	-3.92545	Slc25a12	E7-2	upregulated	5365909	7.73847	11.7221	0.00331796	0.985048	-0.465932	6887703	alt-N-term	chr2:71166553-71166687(-)
ENSMUSG00000069601	-3.96237	Ank3	I49-10	upregulated	5487084	7.53192	11.4438	0.00211786	0.985048	0.011476	6768609		chr10:69476723-69476775(+)
ENSMUSG00000017670	-3.97277	Elmo2	E25-2	upregulated	4887561	6.40287	10.7806	0.00338372	0.985048	-0.0998713	6892991	bleedingExon	chr2:165117245-165117446(-)
ENSMUSG00000037341	-4.02119	Slc9a7	E14-1	upregulated	4781993	6.34611	8.36238	0.00241137	0.985048	0.0344567	7015941	cassette-exon|cassetteExon	chrX:19716048-19716087(-)
ENSMUSG00000049624	-4.08148	Slc17a5	I6-4	upregulated	5390778	3.93492	8.45218	0.00129141	0.985048	-0.0540289	6997119		chr9:78409871-78410214(-)
ENSMUSG00000019943	-4.12999	Atp2b1	I2-3	upregulated	4886796	6.77439	11.9761	0.00350877	0.985048	-0.057684	6770127		chr10:98432649-98432795(+)
ENSMUSG00000030854	-4.13201	Ptpn5	E14-3	upregulated	4609463	8.02897	11.8744	0.0016684	0.985048	0.143574	6967109	bleedingExon|exon-region-exclusion|exon-region-exclusion|retainedIntron	chr7:54338321-54338419(-)
ENSMUSG00000006763	-4.13805	Saal1	E11-3	upregulated	5199563	3.44183	8.22748	0.00327194	0.985048	-0.0905192	6967058	bleedingExon	chr7:53947623-53947895(-)
ENSMUSG00000022488	-4.15642	Nckap1l	I6-1	upregulated	5140945	3.69284	7.68616	0.00469001	0.985048	-0.128145	6833513		chr15:103293034-103293101(+)
ENSMUSG00000078784	-4.17198	1810022K09Rik	I3-1	upregulated	4795466	7.87963	9.7924	0.00355097	0.985048	-0.041025	6903323		chr3:14606439-14607027(-)
ENSMUSG00000036452	-4.17755	Arhgap26	E35-1	upregulated	4638926	6.50667	11.1979	0.00247039	0.985048	-0.0628883	6860259	alt-N-term|altPromoter	chr18:39451145-39451282(+)
ENSMUSG00000030310	-4.20462	Slc6a1	I1-6	upregulated	4697861	8.60588	11.4981	0.00424366	0.985048	-0.207147	6949153		chr6:114248925-114249068(+)
ENSMUSG00000024459	-4.27012	H2-M5	E1-2	upregulated	4521860	3.26648	5.87197	0.000843082	0.985048	-0.593853	6855203		chr17:37125908-37126102(-)
ENSMUSG00000005125	-4.30528	Ndrg1	E17-5	upregulated	5105942	5.63431	10.7809	0.00276738	0.985048	-0.122947	6836358		chr15:66763942-66764099(-)
ENSMUSG00000042111	-4.32802	Ccdc115	I3-1	upregulated	5439213	5.55372	8.38658	0.00457236	0.985048	-0.233775	6757796		chr1:34495423-34495516(-)
ENSMUSG00000039473	-4.46458	Ubn1	I18-1	upregulated	5438755	4.57855	7.97673	0.00138448	0.985048	-0.0226957	6839096		chr16:5082532-5082706(+)
ENSMUSG00000070695	-4.51366	Cntnap5a	I6-2	upregulated	4580675	3.6568	8.84872	0.00353821	0.985048	-0.383831	6752381		chr1:118000377-118000509(+)
ENSMUSG00000061436	-4.54573	Hipk2	E3-3	upregulated	5235808	4.73159	11.4412	0.00475744	0.985048	-0.126958	6952900	bleedingExon	chr6:38767951-38768220(-)
ENSMUSG00000036676	-4.59439	Tmtc3	I3-3	upregulated	4488761	4.2475	8.46848	0.00456948	0.985048	-0.0288533	6776504	intron-retention	chr10:99939438-99939573(-)
ENSMUSG00000060450	-4.6224	Rnf14	I3-3	upregulated	5050983	10.7091	11.789	0.00350973	0.985048	-0.0636378	6860254		chr18:38458010-38458044(+)
ENSMUSG00000036054	-4.687	Sugp2	I6-1	upregulated	4795899	3.22173	8.33108	0.00032141	0.985048	0.132043	6976986		chr8:72772608-72772667(+)
ENSMUSG00000038844	-4.71223	Kif16b	I7-2	upregulated	4594255	2.95592	7.4562	0.000250988	0.985048	-0.236554	6891565		chr2:142674873-142675048(-)
ENSMUSG00000020024	-4.76372	Ccdc41	I1-5	upregulated	4849954	4.04712	7.59005	5.7201e-05	0.939399	-0.0221811	6769934		chr10:94172986-94173540(+)
ENSMUSG00000030621	-4.7969	Me3	E4-2	upregulated	5066026	5.43474	10.5068	0.00128544	0.985048	-0.274803	6962467	cassette-exon	chr7:96791482-96791546(+)
ENSMUSG00000038011	-4.82038	Dnahc10	E10-1	upregulated	4623568	4.52283	6.11051	0.000641285	0.985048	0.108227	6934328		chr5:125223911-125224072(+)
ENSMUSG00000062372	-4.82333	Otof	I10-1	upregulated	5228399	5.50669	8.40157	0.00225499	0.985048	-0.316507	6937002		chr5:30705877-30706280(-)
ENSMUSG00000030761	-4.85292	Myo7a	E14-1	upregulated	5609959	4.57847	7.45894	0.000296234	0.985048	0.506258	6969639		chr7:105245623-105245729(-)
ENSMUSG00000024462	-4.91253	Gabbr1	U24-1	upregulated	5006664	8.89457	12.1249	0.00336506	0.985048	-0.0254097	6850271		chr17:37211603-37212232(+)
ENSMUSG00000022537	-4.92529	Tmem44	I7-2	upregulated	4806149	6.04757	10.1998	0.00454085	0.985048	0.0241417	6845042	intron-retention	chr16:30541061-30542980(-)
ENSMUSG00000006576	-4.92597	Slc4a3	E4-4	upregulated	5583053	8.58261	10.0187	0.00319032	0.985048	-0.0866483	6750643		chr1:75544034-75544144(+)
ENSMUSG00000028977	-4.93887	Casz1	I11-1	upregulated	5082044	3.83713	6.83297	0.000456242	0.985048	-0.208938	6918740		chr4:148308837-148308977(+)
ENSMUSG00000079738	-4.94964	Rundc2a	I4-3	upregulated	4746963	3.64217	8.00829	5.22808e-05	0.939399	0.136343	6839419		chr16:11371292-11371319(+)
ENSMUSG00000060534	-4.97032	Dcc	I12-3	upregulated	4447678	2.35183	9.60121	0.00277507	0.985048	-0.0856137	6866545		chr18:71692368-71692571(-)
ENSMUSG00000062098	-5.00355	Btbd3	I9-5	upregulated	4348775	7.43494	3.54373	0.00434848	0.985048	0.572587	6881556		chr2:138347038-138347097(+)
ENSMUSG00000038665	-5.10425	Dgki	I2-9	upregulated	5398250	6.80334	10.3784	0.00404494	0.985048	0.0147902	6952763		chr6:37218316-37218673(-)
ENSMUSG00000027858	-5.11372	Tspan2	U9-1	upregulated	5503544	6.3679	10.4367	0.00362723	0.985048	-0.404584	6900082		chr3:102577028-102577189(+)
ENSMUSG00000040563	-5.11731	BC018242	I5-1	upregulated	4690394	8.47422	10.5697	0.000520862	0.985048	-0.0635038	6987414		chr9:21745595-21745626(+)
ENSMUSG00000042292	-5.12732	Mkl1	E13-1	upregulated	4729651	4.34608	8.52984	0.00259695	0.985048	0.00852167	6837252		chr15:80848550-80848598(-)
ENSMUSG00000007653	-5.16256	Gabrb2	I6-12	upregulated	5216438	4.80403	11.1535	0.0041859	0.985048	-0.169262	6780331		chr11:42380298-42380731(+)
ENSMUSG00000074529	-5.19132	C330013J21Rik	I4-2	upregulated	4790207	2.9182	6.32114	0.00334364	0.985048	-0.00485	6894036		chr2:177640692-177640716(-)
ENSMUSG00000060450	-5.31798	Rnf14	E3-1	upregulated	5073500	9.59379	11.789	0.000606193	0.985048	-0.0636378	6860254	cassette-exon|cassetteExon	chr18:38457157-38457228(+)
ENSMUSG00000025958	-5.41179	Creb1	I1-6	upregulated	4918732	3.19304	10.0986	8.28524e-05	0.939399	0.00948	6750007		chr1:64592303-64592329(+)
ENSMUSG00000030795	-5.47651	Fus	E9-2	upregulated	4401881	7.5497	9.46337	0.00402869	0.985048	-1.35188	6964376	bleedingExon	chr7:135123105-135123131(+)
ENSMUSG00000026185	-5.56559	Igfbp5	I1-5	upregulated	5200682	6.11947	10.1478	0.00313727	0.985048	-0.230077	6759664		chr1:72912390-72912616(-)
ENSMUSG00000002012	-5.66143	Pnck	I8-1	upregulated	4720735	5.05614	8.81459	0.00192397	0.985048	-0.339577	7017585		chrX:70902915-70903051(-)
ENSMUSG00000058594	-5.77995	Fbxo18	E3-2	upregulated	4711096	4.28082	9.02559	0.00236519	0.985048	0.00970889	6884721		chr2:11689247-11689273(-)
ENSMUSG00000049044	-5.8171	Rapgef4	I5-18	upregulated	4413312	5.06045	11.3525	0.00106489	0.985048	-0.234673	6878040		chr2:71932860-71933000(+)
ENSMUSG00000021076	-5.85689	Actr10	I5-1	upregulated	5043390	3.49703	7.90607	0.00219234	0.985048	-0.0648717	6795885		chr12:72048554-72048666(+)
ENSMUSG00000030621	-5.89705	Me3	I13-1	upregulated	4742331	5.96163	10.5068	0.00218364	0.985048	-0.274803	6962467		chr7:96975845-96976218(+)
ENSMUSG00000044288	-5.96211	Cnr1	E5-1	upregulated	4829230	8.66168	10.8645	0.00127088	0.985048	0.358304	6912565	cassette-exon	chr4:34025005-34025050(+)
ENSMUSG00000064922	-6.08637	U6.173	U1-9	upregulated	4895687	9.44802	9.61771	0.00334984	0.985048	-0.05119	6809764		chr13:104506369-104506394(+)
ENSMUSG00000030533	-6.10555	Unc45a	E12-1	upregulated	4389343	7.65864	8.65958	0.00203733	0.985048	0.100112	6968776		chr7:87474447-87474526(-)
ENSMUSG00000028194	-6.19646	Ddah1	I2-14	upregulated	5083563	4.29852	11.6503	0.000458913	0.985048	-0.0481208	6902169		chr3:145467985-145469556(+)
ENSMUSG00000074826	-6.30516	Gm10767	E4-3	upregulated	4768888	6.4469	6.26268	3.8394e-05	0.939399	0.405233	6807787		chr13:67009272-67009423(+)
ENSMUSG00000089704	-6.34684	Galnt2	I1-229	upregulated	4376564	6.70119	9.75357	0.00252319	0.985048	0.0465133	6979599		chr8:124362832-124362856(+)
ENSMUSG00000089704	-6.43809	Galnt2	I1-222	upregulated	4511243	8.11814	9.75357	0.00329661	0.985048	0.0465133	6979599		chr8:124360438-124360495(+)
ENSMUSG00000089704	-6.60855	Galnt2	I1-221	upregulated	4417955	8.69529	9.75357	0.00244287	0.985048	0.0465133	6979599		chr8:124360264-124360307(+)
ENSMUSG00000020524	-6.6122	Gria1	E17-1	upregulated	4653033	11.8397	11.7535	0.00160124	0.985048	-0.256587	6781201	cassetteExon|mutually-exclusive-exon	chr11:57124199-57124224(+)
ENSMUSG00000051331	-7.00088	Cacna1c	I46-5	upregulated	4605691	2.7897	9.87465	0.00339623	0.985048	-0.0425125	6956902		chr6:118556333-118556360(-)
ENSMUSG00000020900	-7.34122	Myh10	E20-1	upregulated	5613563	8.39817	10.7659	0.00213387	0.985048	0.0660725	6781941	cassette-exon	chr11:68588867-68588918(+)
ENSMUSG00000021268	-7.39554	Meg3	I5-6	upregulated	4629210	7.81724	12.1323	0.00463379	0.985048	-0.196077	6797969		chr12:110786395-110786428(+)
ENSMUSG00000066129	-7.41121	Kndc1	E18-1	upregulated	4426026	7.14275	8.09011	0.00101427	0.985048	0.348423	6965071		chr7:147113080-147113150(+)
ENSMUSG00000032615	-7.56721	Nt5m	E7-1	upregulated	4502907	2.54017	8.30277	5.82827e-05	0.939399	-0.24119	6781383	alt-C-term	chr11:59692838-59692951(+)
ENSMUSG00000045349	-7.58455	Sh2d5	E2-1	upregulated	4336229	7.96103	10.0081	0.000816348	0.985048	0.008936	6917979	mutually-exclusive-exon	chr4:137809542-137809603(+)
ENSMUSG00000020674	-7.78032	Pxdn	E17-1	upregulated	5359221	3.82986	10.1759	0.00215411	0.985048	-0.286996	6794111	altPromoter	chr12:30684700-30684745(+)
ENSMUSG00000048078	-7.92769	Odz4	I14-12	upregulated	5362033	5.7605	10.7404	0.00449171	0.985048	0.0341667	6962736		chr7:103718081-103718272(+)
ENSMUSG00000019769	-8.48928	Syne1	I80-1	upregulated	4460715	5.15469	11.0184	0.000783088	0.985048	0.00570222	6765551		chr10:5124491-5124533(+)
ENSMUSG00000026620	-8.54167	Mark1	I1-6	upregulated	4605367	5.7751	9.29988	0.00451602	0.985048	0.0858104	6764841		chr1:186805306-186805726(-)
ENSMUSG00000022899	-8.66548	Slc15a2	E1-3	upregulated	4918915	2.94617	7.90029	0.00335443	0.985048	-0.119282	6845444		chr16:36784785-36784810(-)
ENSMUSG00000030527	-8.86865	Crtc3	E7-1	upregulated	4885397	6.49302	7.92743	0.0023143	0.985048	0.887202	6968796		chr7:87754784-87754815(-)
ENSMUSG00000052572	-9.1369	Dlg2	I27-7	upregulated	4343986	6.30151	11.1371	0.00121083	0.985048	0.166721	6962502		chr7:99354050-99354148(+)
ENSMUSG00000030653	-9.63499	Pde2a	E8-1	upregulated	4383865	10.4509	11.4777	0.000652971	0.985048	0.21614	6963006		chr7:108633057-108633104(+)
ENSMUSG00000055116	-10.8832	Arntl	E3-1	upregulated	5512153	8.31032	9.18332	0.000501092	0.985048	0.244676	6963558	cassetteExon	chr7:120418187-120418216(+)
ENSMUSG00000032582	-11.1215	Rbm6	E21-2	upregulated	5449643	1.8655	8.51893	0.00207177	0.985048	-0.054994	6998649		chr9:107675919-107675943(-)
ENSMUSG00000030653	-11.3532	Pde2a	E11-1	upregulated	4725997	9.73982	11.4777	0.000510588	0.985048	0.21614	6963006		chr7:108648902-108648957(+)
ENSMUSG00000030744	-12.1409	Rps3	E4-1	upregulated	5487547	6.14257	10.6389	0.00234015	0.985048	-0.159725	6969735	alt-5'|bleedingExon	chr7:106628402-106628434(-)
ENSMUSG00000038187	-16.8433	Btbd10	E7-2	upregulated	5078099	5.20577	8.49607	0.000289383	0.985048	0.574549	6970568		chr7:120476234-120476261(-)
ENSMUSG00000055116	-17.1126	Arntl	E18-1	upregulated	4836326	4.79813	9.18332	3.62689e-05	0.939399	0.244676	6963558		chr7:120449550-120449634(+)
ENSMUSG00000059031	-18.8931	Olfr482	U1-5	upregulated	4933075	6.2409	4.63411	0.000405564	0.985048	0.200873	6970302		chr7:115237460-115237611(-)
TLS KO vs WT 8w Spinal cord
Ensembl	FIRMA fold change	symbol	exons	regulation_call	probeset	baseline_ probeset_exp	constitutive_ baseline_exp	FIRMA_ raw p value	FIRMA_adjp	gene-expression-change	transcript cluster ID	exon annotations	probeset location
ENSMUSG00000053025	15.7377	Sv2b	I2-10	downregulated	5031690	5.59812	11.007	0.000309346	0.789712	-0.152272	6968465		chr7:82441566-82441590(-)
ENSMUSG00000030780	12.6718	BC017158	E11-1	downregulated	4611639	10.3333	9.07346	7.22909e-05	0.789712	0.03502	6971432		chr7:135416060-135416118(-)
ENSMUSG00000042055	7.93961	Wdr11	E12-1	downregulated	5239982	8.75255	9.80051	0.000327594	0.800294	-0.397963	6964478		chr7:136757414-136757441(+)
ENSMUSG00000021357	7.66128	Exoc2	I1-11	downregulated	5052975	5.33614	9.667	0.00212522	0.861834	-0.0175276	6812066		chr13:31047686-31048071(-)
ENSMUSG00000027239	7.44304	Mdk	U6-1	downregulated	4429109	4.47082	9.5697	0.00340335	0.86253	0.12542	6888785		chr2:91769829-91769873(-)
ENSMUSG00000030795	7.18285	Fus	E13-4	downregulated	5139944	8.81376	9.49282	0.000491124	0.860634	-1.27914	6964374	alternative_polyA	chr7:135125405-135125528(+)
ENSMUSG00000046168	6.96535	Kcnrg	E1-1	downregulated	5549586	5.44263	6.04278	0.00452292	0.871153	-0.445114	6819629		chr14:62226299-62226323(+)
ENSMUSG00000061298	6.28572	Agbl4	I1-3	downregulated	4412616	4.59794	10.0366	0.00353332	0.86253	0.107208	6916298		chr4:110108110-110108551(+)
ENSMUSG00000026469	5.88678	Xpr1	I14-1	downregulated	4936000	4.62337	9.6947	0.00201641	0.861834	0.0950811	6763217		chr1:157138917-157139120(-)
ENSMUSG00000037188	5.8469	Grhl3	E9-1	downregulated	5368867	5.29458	6.89435	0.00452987	0.871153	-0.145208	6926087		chr4:135108506-135108606(-)
ENSMUSG00000020255	5.83385	D10Wsu102e	E1-1	downregulated	4356698	6.60051	8.222	0.00339183	0.86253	0.0141383	6769381		chr10:82822956-82823001(+)
ENSMUSG00000031543	5.79124	Ank1	E48-2	downregulated	4506825	5.95543	10.1876	0.00407769	0.862551	0.0834385	6974647	alt-5'|altFivePrime	chr8:24251739-24251763(+)
ENSMUSG00000020319	5.68675	AV249152	I19-3	downregulated	5522418	3.63193	6.98743	0.00149325	0.861834	0.0660047	6779288		chr11:21798431-21798455(+)
ENSMUSG00000048170	5.66756	Mcmbp	E8-1	downregulated	4812961	9.57986	9.81448	0.000399317	0.822314	-0.453254	6971466		chr7:135856184-135856246(-)
ENSMUSG00000029993	5.66739	Nfu1	I3-3	downregulated	5603352	6.13355	9.95121	0.00383522	0.86253	0.0239333	6947675		chr6:86961344-86962284(+)
ENSMUSG00000080774	5.5831	Gm9143	E1-1	downregulated	5562308	5.83773	9.14686	0.00159788	0.861834	0.0545875	7012989		chrX:100232980-100233023(+)
ENSMUSG00000055319	5.47176	Sec23ip	E12-1	downregulated	4553416	8.63807	6.60709	0.000983412	0.861834	0.526172	6964433		chr7:135911085-135911176(+)
ENSMUSG00000028542	5.27436	Slc6a9	I18-2	downregulated	4801427	7.35524	12.9862	0.00368268	0.86253	0.0362242	6916663		chr4:117539814-117540299(+)
ENSMUSG00000028687	5.27094	Mutyh	E14-3	downregulated	5223615	4.71657	6.85886	0.000729723	0.861834	-0.00157	6916597		chr4:116491988-116492028(+)
ENSMUSG00000014767	5.2637	Tbp	E1-1	downregulated	5445151	5.9157	10.1089	0.00070395	0.861834	0.0673289	6848858		chr17:15636824-15636900(+)
ENSMUSG00000030314	5.18575	Atg7	I21-4	downregulated	5143909	5.6699	8.62948	0.00169203	0.861834	0.0107656	6949168		chr6:114740969-114740996(+)
ENSMUSG00000031668	5.15651	Eif2ak3	I1-4	downregulated	5481066	6.14288	8.52837	0.00367517	0.86253	0.107635	6946894		chr6:70797971-70798314(+)
ENSMUSG00000051910	5.1217	Sox6	I17-1	downregulated	5543726	4.87216	7.67931	0.00159073	0.861834	-0.0567078	6970735		chr7:122687958-122687983(-)
ENSMUSG00000037049	5.00942	Smpd1	I3-1	downregulated	4527850	7.46459	10.1751	0.00264454	0.86253	0.787805	6963202		chr7:112705195-112705225(+)
ENSMUSG00000015697	4.8274	Setdb1	I21-1	downregulated	4957471	4.78288	8.86667	0.00271174	0.86253	0.205851	6907165		chr3:95128113-95128181(-)
ENSMUSG00000025261	4.79909	Huwe1	I76-2	downregulated	4348120	3.49461	11.5707	0.0043091	0.86747	-0.00671889	7014551		chrX:148356190-148356243(+)
ENSMUSG00000036054	4.72883	Sugp2	E14-3	downregulated	5494503	5.99114	8.1563	0.000156645	0.789712	0.138347	6976986		chr8:72789415-72789583(+)
ENSMUSG00000037358	4.65376	4930578C19Rik	E3-1	downregulated	5116475	5.12142	6.19725	0.00381121	0.86253	0.238259	7015894	cassette-exon	chrX:18026463-18026543(-)
ENSMUSG00000025224	4.48349	Gbf1	I4-2	downregulated	5275117	4.33693	9.71204	0.00367478	0.86253	0.0451631	6870029		chr19:46326300-46326603(+)
ENSMUSG00000030795	4.40057	Fus	E4-2	downregulated	5273628	9.90595	9.49282	0.00295576	0.86253	-1.27914	6964374		chr7:135115409-135115494(+)
ENSMUSG00000036391	4.39586	Sec24a	I23-1	downregulated	5328405	5.78998	9.69854	0.0046181	0.873601	-0.0427455	6788134		chr11:51510735-51511381(-)
ENSMUSG00000030847	4.37686	Bag3	E4-3	downregulated	5098800	9.48146	8.925	0.00133013	0.861834	-0.230603	6964424		chr7:135689286-135689342(+)
ENSMUSG00000043535	4.35178	Setx	U30-1	downregulated	4410819	5.78418	8.92881	0.00110387	0.861834	0.202356	6875994		chr2:29038007-29038297(+)
ENSMUSG00000059995	4.31955	Atxn7l3	I1-3	downregulated	4582984	6.35893	8.97897	0.00265276	0.86253	0.0910392	6791548		chr11:102157139-102157186(-)
ENSMUSG00000032313	4.19195	AI118078	I12-2	downregulated	4310912	6.24848	7.7235	0.00148106	0.861834	0.260566	6989258	intron-retention	chr9:55283454-55284805(+)
ENSMUSG00000001986	4.1587	Gria3	I4-18	downregulated	5488871	5.26988	9.62623	0.0028867	0.86253	0.00275667	7010835		chrX:38889442-38890160(+)
ENSMUSG00000031543	4.05935	Ank1	E2-1	downregulated	5418511	7.95596	10.1876	0.000186152	0.789712	0.0834385	6974647	alt-N-term|altPromoter	chr8:24145614-24145702(+)
ENSMUSG00000032786	4.04434	Alas1	I7-2	downregulated	5303226	5.3994	8.39302	0.0046579	0.873601	0.079715	6998564		chr9:106143222-106143360(-)
ENSMUSG00000002475	4.02606	Abhd3	E9-1	downregulated	5203929	9.23883	10.9992	0.000528821	0.861834	-0.2513	6863326	alt-3'	chr18:10645180-10645204(-)
ENSMUSG00000042942	4.02322	Greb1l	I8-1	downregulated	5470055	6.42396	7.34667	0.000164668	0.789712	0.113757	6858810		chr18:10499786-10499810(+)
ENSMUSG00000028041	3.9771	Adam15	E12-1	downregulated	4578418	8.89622	9.47045	0.00324765	0.86253	0.1973	6906830	cassette-exon	chr3:89147865-89147895(-)
ENSMUSG00000029658	3.88851	Wdr95	E15-1	downregulated	4556010	6.42453	7.19581	0.00112358	0.861834	-0.0566417	6935717		chr5:150385674-150385704(+)
ENSMUSG00000031767	3.87348	Nudt7	I2-2	downregulated	5089247	6.69317	8.41189	0.00329331	0.86253	-0.205143	6979313		chr8:116661225-116661249(+)
ENSMUSG00000022139	3.85104	Mbnl2	I3-1	downregulated	5088020	7.99086	11.9403	0.00100027	0.861834	0.0443287	6822167		chr14:120716606-120716797(+)
ENSMUSG00000018501	3.81298	Ncor1	E11-1	downregulated	5285402	10.1032	8.94503	9.49401e-05	0.789712	0.156935	6788903	alt-3'|cassetteExon	chr11:62216938-62216964(-)
ENSMUSG00000021697	3.81063	Depdc1b	E13-1	downregulated	5023214	4.40901	6.40939	0.00494678	0.873601	0.0492733	6810066		chr13:109196990-109197016(+)
ENSMUSG00000054999	3.77917	Naaladl1	E5-1	downregulated	5508461	5.80621	5.5608	0.00016486	0.789712	-0.163387	6867837		chr19:6108466-6108727(+)
ENSMUSG00000020388	3.76474	Pdlim4	I7-1	downregulated	4676729	5.22531	7.48892	0.00470292	0.873601	-0.0947667	6788314		chr11:53869013-53869076(-)
ENSMUSG00000029247	3.75004	Paics	E1-1	downregulated	5030009	7.9355	9.10486	0.00155132	0.861834	0.0117667	6931835	altPromoter	chr5:77380360-77380413(+)
ENSMUSG00000022419	3.69599	Deptor	I4-1	downregulated	5599558	4.14051	8.96299	0.00401802	0.86253	0.0158279	6830505		chr15:54995091-54995538(+)
ENSMUSG00000048154	3.63489	Mll2	E35-8	downregulated	5029287	6.97501	8.84598	0.00232565	0.861834	0.0637946	6838407		chr15:98679999-98680028(-)
ENSMUSG00000005583	3.62922	Mef2c	I8-2	downregulated	4432374	5.49836	8.681	0.00392825	0.86253	0.103868	6808609		chr13:83767837-83767943(+)
ENSMUSG00000050310	3.62828	Rictor	I5-1	downregulated	5422041	7.34599	9.07306	0.000865712	0.861834	0.0206431	6828492		chr15:6695590-6695682(+)
ENSMUSG00000016933	3.56816	Plcg1	I2-2	downregulated	4979551	6.06277	8.00514	0.00365379	0.86253	0.262755	6882880		chr2:160557979-160558206(+)
ENSMUSG00000028698	3.54894	Pik3r3	I1-2	downregulated	4806808	7.08811	9.97852	0.00166733	0.861834	-0.296098	6916540		chr4:115895111-115895141(+)
ENSMUSG00000000416	3.52331	Cttnbp2	I25-1	downregulated	5012992	5.75297	9.51791	0.00365912	0.86253	0.334232	6951991		chr6:18324319-18324495(-)
ENSMUSG00000028910	3.51446	Mecr	E8-1	downregulated	5182783	7.09749	8.92529	0.00295119	0.86253	0.320808	6917437	cassette-exon	chr4:131417093-131417147(+)
ENSMUSG00000021198	3.50821	Unc79	E6-1	downregulated	4353124	12.3241	8.86417	0.000920435	0.861834	0.0828223	6797517		chr12:104249424-104249478(+)
ENSMUSG00000004040	3.50499	Stat3	I1-1	downregulated	4999053	7.25133	10.0567	0.00272146	0.86253	-0.0454817	6791451		chr11:100800080-100800414(-)
ENSMUSG00000048856	3.48386	Slc25a47	E1-2	downregulated	4833775	7.93361	6.79403	0.00339119	0.86253	-0.303353	6797952		chr12:110089390-110089414(+)
ENSMUSG00000016534	3.44535	Lamp2	E11-1	downregulated	4531027	10.4477	12.6002	0.00447895	0.870583	-0.109012	7016416	alt-C-term	chrX:35758620-35758718(-)
ENSMUSG00000025255	3.43309	Zfhx4	E3-1	downregulated	4785623	10.0654	8.50586	0.00177156	0.861834	0.116026	6895460		chr3:5245232-5245629(+)
ENSMUSG00000031738	3.41381	Irx6	E3-1	downregulated	4414013	5.41231	6.27693	0.00373958	0.86253	-0.100931	6978223		chr8:95200846-95200950(+)
ENSMUSG00000039607	3.40597	Rbms3	I1-7	downregulated	4492863	6.289	10.2743	0.00247747	0.861834	0.0949938	6999332		chr9:117487991-117488286(-)
ENSMUSG00000021987	3.36147	Mtmr6	I10-1	downregulated	4658225	6.30968	10.1194	0.00335851	0.86253	-0.0374647	6819547		chr14:60915141-60915209(+)
ENSMUSG00000001127	3.29537	Araf	E17-1	downregulated	4448819	9.59787	12.6378	0.00323763	0.86253	-0.02042	7010347		chrX:20436812-20436899(+)
ENSMUSG00000040549	3.29307	Ckap5	I2-2	downregulated	4422174	6.53349	9.93096	0.00144479	0.861834	0.1006	6879059		chr2:91367648-91367968(+)
ENSMUSG00000004892	3.28359	Bcan	E14-2	downregulated	4345809	10.4824	10.5451	0.000906571	0.861834	-0.265313	6906694		chr3:87791521-87791668(-)
ENSMUSG00000024853	3.26888	Sf3b2	I4-2	downregulated	4461355	4.72617	8.67361	0.00361285	0.86253	-0.00380333	6871091		chr19:5292118-5292154(-)
ENSMUSG00000004892	3.23233	Bcan	E10-1	downregulated	4777607	10.6273	10.5451	8.08729e-05	0.789712	-0.265313	6906694		chr3:87794103-87794169(-)
ENSMUSG00000030616	3.21999	Sytl2	E8-1	downregulated	4988520	7.73642	9.96651	0.000940097	0.861834	-0.291877	6962491	alt-N-term|altPromoter|bleedingExon	chr7:97528880-97529493(+)
ENSMUSG00000020682	3.17394	Mmp28	E9-4	downregulated	4615405	6.04233	7.64117	0.0012247	0.861834	-0.097915	6790275	alt-C-term	chr11:83254461-83255553(-)
ENSMUSG00000032363	3.15418	Adamts7	E20-5	downregulated	4846894	5.90578	7.30569	0.00319604	0.86253	0.025205	6991267	exon-region-exclusion|exon-region-exclusion	chr9:90090711-90090764(+)
ENSMUSG00000046707	3.13959	Csnk2a2	E14-3	downregulated	5611532	7.35049	9.90624	0.00352054	0.86253	-0.0167171	6984536		chr8:97972035-97972178(-)
ENSMUSG00000021198	3.10827	Unc79	E5-1	downregulated	5345218	12.8363	8.86417	0.00463129	0.873601	0.0828223	6797517		chr12:104240032-104240183(+)
ENSMUSG00000040936	3.10617	Ulk4	E20-1	downregulated	5223815	4.06258	6.48076	0.00489935	0.873601	0.12117	6999502		chr9:121117334-121117376(-)
ENSMUSG00000040957	3.10534	Cables1	I3-1	downregulated	4851177	5.39718	8.08883	0.00420736	0.864477	0.193481	6858871		chr18:12044320-12044617(+)
ENSMUSG00000000392	3.09006	Fap	E3-1	downregulated	5312589	5.45832	4.86607	0.00045747	0.840262	0.0387427	6887191	cassette-exon	chr2:62401688-62401713(-)
ENSMUSG00000021198	3.08522	Unc79	E4-2	downregulated	5585048	12.2871	8.86417	0.000975805	0.861834	0.0828223	6797517		chr12:104236820-104236906(+)
ENSMUSG00000025997	3.07869	Ikzf2	I7-1	downregulated	4562485	5.35716	7.4714	0.00128767	0.861834	0.099685	6759549		chr1:69616241-69616585(-)
ENSMUSG00000004677	3.06754	Myo9b	E23-3	downregulated	4416395	9.1296	7.61505	0.00421158	0.864477	0.150892	6977058	exon-region-exclusion|exon-region-exclusion|retainedIntron	chr8:73872824-73872854(+)
ENSMUSG00000038453	3.04304	Srcin1	E9-3	downregulated	4597450	9.41445	9.46152	0.00273642	0.86253	-0.0422989	6791204		chr11:97395878-97396257(-)
ENSMUSG00000021198	3.04127	Unc79	E3-1	downregulated	4760146	12.0978	8.86417	0.00187332	0.861834	0.0828223	6797517		chr12:104229566-104229678(+)
ENSMUSG00000048807	3.01954	Slc35e4	I1-3	downregulated	4837240	5.62253	8.62064	0.000148633	0.789712	-0.0224864	6785631		chr11:3808636-3808704(-)
ENSMUSG00000030847	3.00153	Bag3	E4-2	downregulated	5102429	10.4097	8.925	0.00119626	0.861834	-0.230603	6964424		chr7:135689203-135689233(+)
ENSMUSG00000004056	2.97686	Akt2	E8-1	downregulated	5323385	6.9346	9.98219	0.00476022	0.873601	0.0679383	6959316	alt-N-term	chr7:28392840-28392909(+)
ENSMUSG00000004018	2.9719	Fancl	I7-2	downregulated	4675408	5.86802	6.77296	0.00390706	0.86253	0.119535	6779588		chr11:26348184-26348588(+)
ENSMUSG00000089634	2.96498	Nat8b	U0-2	downregulated	5225668	5.68125	5.48507	0.00450782	0.871153	0.00698778	6955173		chr6:85883374-85883402(-)
ENSMUSG00000020593	2.96305	Lpin1	I6-1	downregulated	4855866	5.70719	10.6756	0.00108454	0.861834	0.13714	6799205		chr12:16582668-16582959(-)
ENSMUSG00000019738	2.95376	Polr2i	E2-7	downregulated	4832332	6.02863	6.70629	0.003314	0.86253	-0.1059	6959568		chr7:31018099-31018135(+)
ENSMUSG00000025580	2.9431	Eif4a3	I1-2	downregulated	4736899	5.45338	9.7379	0.00128206	0.861834	0.0541517	6792699		chr11:119159598-119159658(-)
ENSMUSG00000048483	2.93864	Zdhhc22	I2-7	downregulated	4319511	8.93294	8.69669	0.00198365	0.861834	0.0602433	6802502		chr12:88321804-88321828(-)
ENSMUSG00000001910	2.93751	Nacc1	I1-1	downregulated	4888246	7.30025	10.437	0.000324538	0.800294	0.0901317	6983869		chr8:87211302-87211466(-)
ENSMUSG00000006056	2.92943	Calcoco2	E6-5	downregulated	4783734	4.24899	5.39168	0.00344748	0.86253	-0.0559783	6791088		chr11:95961238-95961265(-)
ENSMUSG00000067851	2.92797	Arfgef1	I33-1	downregulated	4358541	7.00424	9.62788	0.00169233	0.861834	0.0258509	6756827		chr1:10137111-10137177(-)
ENSMUSG00000004892	2.92336	Bcan	E13-1	downregulated	5544390	10.5146	10.5451	0.000432483	0.829507	-0.265313	6906694		chr3:87792280-87792355(-)
ENSMUSG00000048583	2.91885	Igf2	E4-6	downregulated	5415426	7.34693	10.8068	0.00382035	0.86253	0.101613	6972317	alt-N-term	chr7:149844370-149844412(-)
ENSMUSG00000028080	2.89989	Lrba	E34-1	downregulated	5175831	9.85663	9.30524	0.00185988	0.861834	-0.147389	6898954		chr3:86177401-86177479(+)
ENSMUSG00000004568	2.89124	Arhgef18	I4-1	downregulated	4366320	5.94688	8.70773	0.00169577	0.861834	0.132574	6973679		chr8:3431406-3431583(+)
ENSMUSG00000020594	2.87117	Pum2	I8-1	downregulated	4983620	4.34207	9.05927	0.00325951	0.86253	0.0672267	6793225		chr12:8709752-8709904(+)
ENSMUSG00000004892	2.86673	Bcan	E11-1	downregulated	5020849	11.2358	10.5451	4.8037e-07	0.198662	-0.265313	6906694		chr3:87793097-87793171(-)
ENSMUSG00000040549	2.85606	Ckap5	E1-1	downregulated	4411421	5.59576	9.93096	0.00142607	0.861834	0.1006	6879059	alt-N-term	chr2:91366885-91366982(+)
ENSMUSG00000001127	2.8471	Araf	E18-2	downregulated	4311170	9.12324	12.6378	0.000594736	0.861834	-0.02042	7010347		chrX:20437250-20437494(+)
ENSMUSG00000084777	2.8396	Gm16742	I3-18	downregulated	4879018	6.16594	5.93569	0.0022344	0.861834	-0.221445	6909587		chr3:134082426-134082475(-)
ENSMUSG00000031930	2.82795	Wwp2	I3-1	downregulated	5444717	6.2636	8.45464	0.00310823	0.86253	-0.0857597	6978968		chr8:109981714-109981763(+)
ENSMUSG00000030621	2.81222	Me3	E17-1	downregulated	5314715	7.81953	9.31764	0.000571555	0.861834	-0.0674183	6962467		chr7:96994751-96994822(+)
ENSMUSG00000020272	2.80193	Stk10	I7-1	downregulated	4876696	6.07823	7.33554	0.00129891	0.861834	0.368042	6779855		chr11:32493485-32493901(+)
ENSMUSG00000023011	2.79105	Faim2	E12-5	downregulated	4899443	11.1471	10.9142	0.00379862	0.86253	-0.0670874	6838460	alternative_polyA	chr15:99327860-99329450(-)
ENSMUSG00000045962	2.77561	Wnk1	E12-1	downregulated	5218203	11.6951	11.8474	0.00226692	0.861834	-0.053935	6956932	alt-N-term	chr6:119912514-119912669(-)
ENSMUSG00000030847	2.76178	Bag3	E4-7	downregulated	5068517	7.31786	8.925	0.00285247	0.86253	-0.230603	6964424		chr7:135689943-135690106(+)
ENSMUSG00000020312	2.74751	Shc2	E6-1	downregulated	4694846	5.92975	8.78219	0.00123671	0.861834	-0.0330622	6775302		chr10:79089787-79089816(-)
ENSMUSG00000037386	2.73496	Rims2	E28-2	downregulated	4953782	10.7268	8.82174	0.000132225	0.789712	-0.113121	6829967	alt-N-term	chr15:39447878-39448049(+)
ENSMUSG00000009079	2.7065	Ewsr1	E10-3	downregulated	5096280	9.62251	9.61227	0.00191818	0.861834	0.237678	6785697	bleedingExon	chr11:4980270-4981706(-)
ENSMUSG00000022019	2.67889	Tdrd3	E14-2	downregulated	5291212	9.8488	9.99	0.0020033	0.861834	-0.24151	6820896		chr14:87911490-87911528(+)
ENSMUSG00000075590	2.66553	Nrbp2	E13-1	downregulated	4812024	11.0361	10.987	0.00137707	0.861834	-0.07067	6836797		chr15:75918723-75918853(-)
ENSMUSG00000037174	2.65054	Elf2	E4-1	downregulated	4544277	10.3112	9.1306	0.00241933	0.861834	0.0791693	6904953	alt-N-term	chr3:51112018-51112121(-)
ENSMUSG00000052812	2.64612	Atad2b	E25-2	downregulated	4344884	10.1997	8.76219	0.00315302	0.86253	0.0877129	6793008		chr12:5013496-5013590(+)
ENSMUSG00000071064	2.64578	Zfp827	E8-1	downregulated	4573077	10.5791	9.01795	0.00249751	0.861834	-0.0365817	6977491		chr8:81660475-81660561(+)
ENSMUSG00000030972	2.63515	Acsm5	E13-1	downregulated	5566004	6.76209	6.67475	0.000167303	0.789712	0.248289	6963881		chr7:126684325-126684369(+)
ENSMUSG00000053929	2.6234	Cyhr1	E3-1	downregulated	5288540	8.67226	11.2797	0.00416892	0.86322	0.183013	6836843	alt-C-term	chr15:76488999-76489194(-)
ENSMUSG00000039007	2.61379	Pgcp	I4-10	downregulated	5151292	5.67675	9.01141	0.00471177	0.873601	-0.0299744	6829624		chr15:33164554-33164679(+)
ENSMUSG00000042453	2.61295	Reln	I43-3	downregulated	5357093	4.36476	10.2894	0.00293036	0.86253	-0.0833722	6936589		chr5:21459662-21460061(-)
ENSMUSG00000020037	2.59655	Rfx4	E17-1	downregulated	4984854	6.43985	8.55384	0.00412101	0.862643	0.115316	6769448	alt-C-term	chr10:84334864-84334943(+)
ENSMUSG00000020627	2.58818	Klhl29	I3-7	downregulated	5111574	6.47987	7.91677	0.00126599	0.861834	0.160916	6798653		chr12:5211800-5211879(-)
ENSMUSG00000024501	2.5799	Dpysl3	E1-1	downregulated	4518547	7.50788	10.8104	0.000719921	0.861834	0.182067	6865100	alt-N-term	chr18:43597707-43597884(-)
ENSMUSG00000038384	2.57156	Setd1b	E7-3	downregulated	5002400	6.99163	8.11332	0.00284635	0.86253	0.150762	6934213		chr5:123602104-123602223(+)
ENSMUSG00000037523	2.56068	Mavs	E1-1	downregulated	5077824	7.35	8.52057	0.00425207	0.864477	0.0895033	6881252		chr2:131059798-131059851(+)
ENSMUSG00000041144	2.55891	Dnahc7c	I38-1	downregulated	4999863	3.55526	6.80567	0.00130702	0.861834	0.344109	6749192		chr1:46280084-46280227(+)
ENSMUSG00000041444	2.55406	Arhgap32	E8-1	downregulated	4913189	11.2662	9.84814	0.000299154	0.789712	0.0253736	6987924		chr9:31995242-31995318(+)
ENSMUSG00000069223	2.54126	4930451E10Rik	E2-1	downregulated	5048691	5.43532	7.13906	0.00245681	0.861834	0.276573	6813447	alt-3'	chr13:55885355-55885432(-)
ENSMUSG00000020704	2.53944	Accn1	I1-95	downregulated	4836039	6.5972	9.75854	0.000416454	0.824062	-0.00165593	6790135		chr11:81187536-81187962(-)
ENSMUSG00000055024	2.53171	Ep300	E30-9	downregulated	5163242	9.26197	8.96794	0.00454598	0.871153	0.207794	6832115		chr15:81481304-81481374(+)
ENSMUSG00000004892	2.53119	Bcan	E14-1	downregulated	4979322	10.1819	10.5451	0.000171759	0.789712	-0.265313	6906694		chr3:87791805-87791879(-)
ENSMUSG00000028080	2.52474	Lrba	E31-1	downregulated	4845048	9.71416	9.30524	0.00200972	0.861834	-0.147389	6898954		chr3:86163689-86164083(+)
ENSMUSG00000056476	2.49171	Med12l	E4-1	downregulated	5162768	10.702	9.61758	0.001853	0.861834	-0.148616	6897819		chr3:58841495-58841652(+)
ENSMUSG00000030703	2.48709	Gdpd3	I7-1	downregulated	4356794	6.99576	5.90182	0.00297887	0.86253	2.38096	6964245		chr7:133913215-133913768(+)
ENSMUSG00000039515	2.4738	Ppp2r4	E12-1	downregulated	5364190	6.91689	7.70432	0.00366075	0.86253	0.270478	6876062	alt-N-term|cassette-exon|cassette-exon	chr2:30301125-30301191(+)
ENSMUSG00000030166	2.44308	Rad52	E8-1	downregulated	5590778	11.877	7.83642	0.00482668	0.873601	0.253583	6949509		chr6:119870849-119871037(+)
ENSMUSG00000031024	2.44008	St5	I5-7	downregulated	4907493	6.30578	7.37182	0.00231818	0.861834	0.187239	6970378		chr7:116689379-116689580(-)
ENSMUSG00000040351	2.43111	Ankib1	E4-1	downregulated	4555656	12.2249	10.4957	0.000747252	0.861834	-0.220104	6935910		chr5:3769433-3769652(-)
ENSMUSG00000028453	2.42359	Fancg	E10-4	downregulated	4962324	7.66049	7.99786	0.00365968	0.86253	0.0397183	6921127		chr4:43016127-43016180(-)
ENSMUSG00000067851	2.41751	Arfgef1	I29-4	downregulated	5317729	4.54201	9.62788	0.0023936	0.861834	0.0258509	6756827		chr1:10143944-10144016(-)
ENSMUSG00000066151	2.40273	Fkbp15	E23-2	downregulated	4674721	8.1234	9.68478	0.0038074	0.86253	0.0216898	6927420		chr4:61973303-61973357(-)
ENSMUSG00000000416	2.38926	Cttnbp2	E2-7	downregulated	5198380	8.75221	9.51791	0.00483065	0.873601	0.334232	6951991		chr6:18464203-18464235(-)
ENSMUSG00000038187	2.38688	Btbd10	E9-2	downregulated	4396064	6.85276	8.83515	0.0035968	0.86253	0.62232	6970568		chr7:120470956-120471337(-)
ENSMUSG00000036501	2.37447	Fam13b	I5-2	downregulated	5135883	7.43047	8.71619	0.000625548	0.861834	0.155048	6864509		chr18:34650005-34650189(-)
ENSMUSG00000028163	2.36977	Nfkb1	E3-1	downregulated	5169022	10.1496	7.59053	0.00202598	0.861834	-0.102262	6909648		chr3:135330717-135330749(-)
ENSMUSG00000040351	2.3669	Ankib1	E5-1	downregulated	4963456	12.3108	10.4957	0.00113667	0.861834	-0.220104	6935910		chr5:3755601-3755722(-)
ENSMUSG00000043013	2.34376	Onecut1	E1-4	downregulated	4853418	6.8618	7.2514	0.00345471	0.86253	-0.0481463	6990510	alt-N-term	chr9:74710444-74710556(+)
ENSMUSG00000044912	2.34148	Syt16	I2-2	downregulated	4828894	7.78337	8.02078	0.00213372	0.861834	0.01823	6796053		chr12:75256174-75256225(+)
ENSMUSG00000028670	2.34069	Lypla2	E9-4	downregulated	5230407	9.17427	10.1125	0.0011777	0.861834	0.032175	6926123		chr4:135524843-135524881(-)
ENSMUSG00000057132	2.33758	Rpgrip1	I14-1	downregulated	5449285	4.32022	4.89531	0.000842902	0.861834	-0.0358967	6819046		chr14:52760125-52760225(+)
ENSMUSG00000035919	2.33644	Bbs9	E24-2	downregulated	5179789	12.0929	10.141	0.000213662	0.789712	-0.169152	6987470	cassette-exon	chr9:22483398-22483443(+)
ENSMUSG00000026004	2.33539	1110028C15Rik	E6-1	downregulated	4465227	7.81936	8.57173	0.00116735	0.861834	-0.169093	6759458	alt-3'|altThreePrime	chr1:66820167-66820191(-)
ENSMUSG00000004892	2.33084	Bcan	E9-1	downregulated	4643041	10.6372	10.5451	0.000648219	0.861834	-0.265313	6906694		chr3:87794616-87794657(-)
ENSMUSG00000025224	2.32422	Gbf1	I35-1	downregulated	4348634	7.54674	9.71204	0.00399877	0.86253	0.0451631	6870029		chr19:46357997-46358030(+)
ENSMUSG00000031708	2.31294	Tecr	I1-18	downregulated	5207008	7.91129	13.0099	0.00225089	0.861834	0.146896	6983789		chr8:86100111-86100206(-)
ENSMUSG00000020422	2.29858	Tns3	E8-1	downregulated	4963562	8.3966	8.79444	0.0031019	0.86253	-0.286265	6785921		chr11:8445234-8445333(-)
ENSMUSG00000041037	2.29227	Irgq	E1-1	downregulated	4947026	5.81083	7.87754	0.00154653	0.861834	-0.0396815	6959130		chr7:25315696-25315923(+)
ENSMUSG00000022452	2.28799	1500032L24Rik	I5-1	downregulated	4724352	6.66419	11.7218	0.00463442	0.873601	-0.0550317	6832191		chr15:82178900-82179213(+)
ENSMUSG00000042567	2.26284	Nek10	E25-1	downregulated	4469902	5.21242	5.12281	0.00117095	0.861834	-0.0354683	6817079		chr14:15770110-15770279(+)
ENSMUSG00000035919	2.2559	Bbs9	E23-1	downregulated	4450636	11.2635	10.141	0.00192935	0.861834	-0.169152	6987470	cassette-exon	chr9:22475235-22475393(+)
ENSMUSG00000022864	2.2558	D16Ertd472e	I1-1	downregulated	4970803	6.9467	8.55851	0.00403099	0.86253	0.002795	6847338		chr16:78576316-78576412(-)
ENSMUSG00000022262	2.25228	Dnahc5	E32-1	downregulated	5590928	5.66142	5.66672	0.000745124	0.861834	0.0696702	6829451		chr15:28237016-28237113(+)
ENSMUSG00000070544	2.24876	Top1	E1-1	downregulated	4918564	5.16055	7.09367	0.00113801	0.861834	0.216683	6882878		chr2:160471648-160471761(+)
ENSMUSG00000041617	2.23777	Ccdc74a	E3-1	downregulated	5012200	10.0532	9.08978	0.0019602	0.861834	-0.237687	6839759		chr16:17648172-17648219(+)
ENSMUSG00000068762	2.2363	Gstm6	E3-3	downregulated	4509879	5.83405	6.19518	0.00430776	0.86747	1.50025	6908075	exon-region-exclusion|exon-region-exclusion	chr3:107745360-107745506(-)
ENSMUSG00000021338	2.22873	Lrrc16a	I5-2	downregulated	5334085	5.46299	8.85984	0.00226267	0.861834	0.226873	6811724		chr13:24282237-24282608(-)
ENSMUSG00000022322	2.22237	Shcbp1	E8-1	downregulated	4354804	5.53093	5.02	0.00414515	0.862643	-0.323318	6980158		chr8:4744491-4744576(-)
ENSMUSG00000037578	2.21781	Pkd2l1	E12-1	downregulated	5493247	6.98865	7.20596	0.000279704	0.789712	-0.323241	6873255		chr19:44224087-44224137(-)
ENSMUSG00000041528	2.18064	Rnf123	E14-1	downregulated	5460479	9.46214	9.58694	0.000190463	0.789712	-0.0315867	6998667		chr9:107972013-107972117(-)
ENSMUSG00000061758	2.15919	Akr1b10	E4-3	downregulated	4994024	10.0114	10.3219	0.00262011	0.86253	0.33056	6945312	alt-3'|altThreePrime	chr6:34340055-34340079(+)
ENSMUSG00000042942	2.15668	Greb1l	I7-5	downregulated	5530040	7.83969	7.34667	0.00447769	0.870583	0.113757	6858810		chr18:10482683-10482709(+)
ENSMUSG00000059288	2.14967	Cdyl	E8-1	downregulated	4745891	10.2601	7.00982	0.00116144	0.861834	-0.00564619	6806203		chr13:35907916-35908397(+)
ENSMUSG00000071103	2.14838	1700029J07Rik	E5-1	downregulated	4654459	6.09023	5.63417	0.00102976	0.861834	-0.487424	6982150		chr8:47053210-47053265(-)
ENSMUSG00000028399	2.14484	Ptprd	E7-1	downregulated	5595980	5.65733	10.8023	0.00123295	0.861834	-0.00449714	6922672	cassette-exon	chr4:76998590-76998655(-)
ENSMUSG00000020412	2.1416	Ascc2	E21-1	downregulated	4985764	6.90253	8.34274	0.00193417	0.861834	0.0784704	6778410		chr11:4585215-4585292(+)
ENSMUSG00000091370	2.13985	RP24-318H2.3	E2-1	downregulated	5212933	6.79035	6.69724	0.00336985	0.86253	0.12858	6767390		chr10:41295353-41295508(+)
ENSMUSG00000051246	2.12881	A930005I04Rik	E3-2	downregulated	5073386	6.71612	6.59551	0.00118756	0.861834	-0.158934	6929858		chr5:35266225-35266439(+)
ENSMUSG00000060924	2.12487	Csmd1	I5-77	downregulated	4443349	5.85226	8.57897	0.00228863	0.861834	0.205347	6980748		chr8:16751651-16751810(-)
ENSMUSG00000034107	2.12185	Ano7	E15-1	downregulated	4467695	7.17532	6.24153	0.00228398	0.861834	0.0437998	6751690		chr1:95292044-95292142(+)
ENSMUSG00000001127	2.11991	Araf	E11-3	downregulated	5107774	7.14366	12.6378	0.00200895	0.861834	-0.02042	7010347	bleedingExon	chrX:20431453-20432433(+)
ENSMUSG00000068167	2.11562	Csnka2ip	E1-1	downregulated	5422628	7.66618	5.82583	0.00414025	0.862643	-0.0177644	6846686		chr16:64478402-64479048(-)
ENSMUSG00000086741	2.1057	Gm15816	I2-2	downregulated	4649042	4.71975	7.1129	0.00413974	0.862643	-0.0897761	6980986		chr8:24254560-24254633(-)
ENSMUSG00000020169	2.07766	Best3	I4-3	downregulated	5257630	6.14822	5.9953	0.00149143	0.861834	-0.171413	6770952		chr10:116433465-116433498(+)
ENSMUSG00000066554	2.07307	Gm10167	E1-3	downregulated	4497809	10.1904	7.8612	0.00353589	0.86253	-0.435335	6943189		chr5:148995104-148995131(-)
ENSMUSG00000040605	2.04415	Bace2	I7-1	downregulated	5492766	5.88816	8.15021	0.000720742	0.861834	-0.197781	6843543		chr16:97643618-97643661(+)
ENSMUSG00000090430	2.03606	AC121821.1	I2-6	downregulated	4668587	5.16911	7.01393	0.00300622	0.86253	0.316382	6860034		chr18:35715817-35716235(+)
ENSMUSG00000002458	2.03386	Rgs19	E4-1	downregulated	4647592	8.21753	8.14584	0.00389335	0.86253	0.100508	6894311	cassette-exon|cassetteExon	chr2:181426238-181426279(-)
ENSMUSG00000035314	2.01793	Gdpd5	E6-1	downregulated	5305861	9.56768	8.77976	0.00251958	0.861834	0.0504939	6962876		chr7:106589685-106589736(+)
ENSMUSG00000022822	2.01781	Abcc5	E32-1	downregulated	4909273	10.3278	9.99518	0.00392366	0.86253	-0.0899304	6844447		chr16:20333673-20333811(-)
ENSMUSG00000041720	-2.00078	Pi4ka	E24-2	upregulated	5218149	10.1144	11.2683	0.000678488	0.861834	-0.00864667	6844269	alt-5'	chr16:17323087-17323129(-)
ENSMUSG00000034252	-2.00409	Senp6	E19-1	upregulated	5386991	8.8643	8.99632	0.0021852	0.861834	0.201591	6990768		chr9:79978571-79978636(+)
ENSMUSG00000079511	-2.00507	Ccdc142	I3-1	upregulated	4583774	6.18257	7.09393	0.0030065	0.86253	-0.0231276	6947392		chr6:83053297-83053385(+)
ENSMUSG00000029547	-2.0117	Ints1	E42-1	upregulated	5461884	8.43112	8.33903	0.00214433	0.861834	0.0735718	6942688		chr5:140229465-140229494(-)
ENSMUSG00000044770	-2.01354	Scml4	I2-1	upregulated	4818315	4.79514	7.31034	0.000895626	0.861834	0.0111944	6767468		chr10:42586953-42587281(+)
ENSMUSG00000009640	-2.02078	Dmap1	E3-1	upregulated	5539288	6.46217	7.29657	0.000526436	0.861834	0.113172	6924863		chr4:117353881-117353955(-)
ENSMUSG00000085806	-2.02555	Gm12023	E6-1	upregulated	4351547	5.29971	6.185	0.00427096	0.865409	-0.01714	6786335		chr11:18499022-18499086(-)
ENSMUSG00000028347	-2.02908	Tmeff1	I7-4	upregulated	5189211	5.86744	10.7111	0.0032449	0.86253	-0.245612	6913348		chr4:48654190-48654538(+)
ENSMUSG00000003031	-2.02936	Cdkn1b	I2-1	upregulated	4462829	8.54586	9.75287	0.00134504	0.861834	-0.25762	6950391	intron-retention	chr6:134872451-134873582(+)
ENSMUSG00000068663	-2.03089	Clec16a	I27-6	upregulated	5579207	8.35029	8.93268	0.00418461	0.864258	-0.023948	6839341		chr16:10708815-10708847(+)
ENSMUSG00000020260	-2.03481	Pofut2	E9-1	upregulated	5554213	7.30263	8.51122	0.00298352	0.86253	0.010775	6768978		chr10:76731294-76731379(+)
ENSMUSG00000042105	-2.03818	Inpp5f	E17-1	upregulated	4550937	8.70182	9.88281	0.00472993	0.873601	-0.635062	6964428	alt-N-term|altPromoter	chr7:135831080-135831111(+)
ENSMUSG00000025041	-2.03868	Nt5c2	U21-2	upregulated	4401489	7.95296	10.4794	0.00113548	0.861834	0.0601283	6873466		chr19:46958237-46958637(-)
ENSMUSG00000045038	-2.04236	Prkce	I13-8	upregulated	4822217	6.58318	11.3497	0.00242943	0.861834	-0.121052	6852820		chr17:86971650-86971806(+)
ENSMUSG00000071454	-2.0434	Dtnb	I5-6	upregulated	4629922	6.88551	10.1329	0.00105435	0.861834	-0.0264375	6792942		chr12:3612194-3612611(+)
ENSMUSG00000040631	-2.04431	Dok4	E9-1	upregulated	4476015	6.14629	7.23042	0.000754234	0.861834	0.0953412	6984485		chr8:97389038-97389113(-)
ENSMUSG00000049411	-2.04621	6030446N20Rik	I5-2	upregulated	4414250	5.32692	7.49068	0.000984122	0.861834	-0.191051	6863417		chr18:12248275-12248645(-)
ENSMUSG00000022748	-2.05297	2610528E23Rik	I2-12	upregulated	4730548	6.00076	7.45211	0.00149579	0.861834	0.108359	6846463		chr16:57444744-57445100(-)
ENSMUSG00000034543	-2.05434	Morc2a	I23-1	upregulated	4335369	6.35201	10.04	0.00361774	0.86253	0.166935	6778315		chr11:3585544-3585572(+)
ENSMUSG00000049643	-2.06383	2310022A10Rik	E2-2	upregulated	5284298	8.58664	9.4741	0.00030891	0.789712	0.0527029	6959309		chr7:28341517-28341542(+)
ENSMUSG00000024944	-2.06547	Arl2	E2-1	upregulated	4547011	5.77826	11.219	0.00174308	0.861834	0.003824	6871199		chr19:6137940-6138118(-)
ENSMUSG00000059898	-2.07151	Dsc3	E6-1	upregulated	4999197	3.60007	5.4619	0.00366122	0.86253	0.0769215	6863755		chr18:20144180-20144275(-)
ENSMUSG00000046169	-2.0748	Adamts6	I19-2	upregulated	4685718	3.94196	8.01377	0.00181164	0.861834	-0.397594	6809817		chr13:105225312-105225435(+)
ENSMUSG00000062908	-2.07809	Acadm	E2-2	upregulated	5049416	7.34673	9.8606	0.00204081	0.861834	-0.129468	6910709		chr3:153604652-153604754(-)
ENSMUSG00000031626	-2.08077	Sorbs2	I33-4	upregulated	5323270	7.9808	10.4613	0.00413473	0.862643	0.0351433	6975861		chr8:46895631-46896345(+)
ENSMUSG00000021033	-2.09507	Gstz1	I7-2	upregulated	4989503	6.6847	8.70703	0.00464487	0.873601	-0.177422	6796777		chr12:88501436-88501991(+)
ENSMUSG00000034456	-2.09744	Uroc1	E7-1	upregulated	5557082	5.44744	6.61712	0.00327413	0.86253	-0.129333	6947927		chr6:90293951-90294015(+)
ENSMUSG00000040575	-2.09775	Nlrp1c-ps	E2-3	upregulated	5463851	3.74415	5.47903	0.00159798	0.861834	-0.441708	6789484		chr11:71093797-71094036(-)
ENSMUSG00000027799	-2.09787	Nbea	I1-11	upregulated	5107256	7.0142	10.2216	0.00478873	0.873601	-0.0247087	6905255		chr3:55963252-55963352(-)
ENSMUSG00000025428	-2.10788	Atp5a1	E11-2	upregulated	4738800	10.8718	11.9525	0.00303014	0.86253	0.00216	6862316	alternative_polyA	chr18:78021158-78021251(+)
ENSMUSG00000035437	-2.10953	Rabgap1	I7-1	upregulated	5263339	6.60434	10.1936	0.00315492	0.86253	-0.265465	6876486		chr2:37339514-37340243(+)
ENSMUSG00000032478	-2.11056	Nme6	E3-1	upregulated	5112811	5.62564	9.80011	0.00449644	0.871153	0.0837533	6992409	alt-3'|cassette-exon	chr9:109737782-109737820(+)
ENSMUSG00000025162	-2.11814	Csnk1d	I11-3	upregulated	5392075	8.02212	11.4804	0.000590123	0.861834	-0.0318578	6792827		chr11:120827634-120827779(-)
ENSMUSG00000040687	-2.12292	Madd	I21-1	upregulated	5490946	7.12454	9.54578	0.00290892	0.86253	0.102428	6888751		chr2:91000809-91001411(-)
ENSMUSG00000039488	-2.12665	Cntn5	I3-21	upregulated	4384269	5.37339	7.69442	0.00211552	0.861834	0.0743652	6993335		chr9:10463414-10463550(-)
ENSMUSG00000009563	-2.13283	Tor2a	I2-1	upregulated	5221154	6.58806	7.65728	0.0027404	0.86253	0.00287333	6876218	intron-retention	chr2:32614078-32614189(+)
ENSMUSG00000021629	-2.13515	Slc30a5	I5-1	upregulated	4754234	7.69578	9.494	0.000712537	0.861834	-0.0220063	6815560		chr13:101590531-101591071(-)
ENSMUSG00000036218	-2.13699	Pdzrn4	I3-8	upregulated	4593100	6.48786	7.00012	0.00224949	0.861834	0.106298	6832733		chr15:92296460-92296680(+)
ENSMUSG00000068859	-2.13879	Sp9	E2-9	upregulated	5401060	4.73239	6.93891	0.00326122	0.86253	0.0677158	6878138	alt-C-term	chr2:73114744-73115357(+)
ENSMUSG00000030703	-2.1393	Gdpd3	E7-1	upregulated	5160106	5.95233	5.90182	7.91027e-05	0.789712	2.38096	6964245		chr7:133912093-133912178(+)
ENSMUSG00000018363	-2.14455	Smurf2	E20-4	upregulated	4928313	7.52957	8.22891	0.00251782	0.861834	-0.0320689	6791970		chr11:106681690-106682727(-)
ENSMUSG00000022710	-2.14644	Usp7	I20-3	upregulated	5518379	8.0609	10.6448	0.0038592	0.86253	-0.0745233	6843834		chr16:8697824-8697905(-)
ENSMUSG00000054641	-2.15309	Mmrn1	E11-2	upregulated	4339625	2.62713	5.03366	0.00425381	0.864477	-0.065985	6946636		chr6:60938809-60939247(+)
ENSMUSG00000020448	-2.15346	Rnf185	E3-1	upregulated	4322715	6.14316	8.3959	0.00497283	0.873601	0.125148	6785603	alt-C-term	chr11:3333818-3333961(-)
ENSMUSG00000028986	-2.15404	Klhl7	I1-5	upregulated	5455111	7.03887	9.31251	0.00169752	0.861834	0.0276176	6929266		chr5:23618442-23618836(+)
ENSMUSG00000007989	-2.16029	Fzd3	E8-1	upregulated	4400926	8.18395	10.2497	0.00301845	0.86253	0.044484	6825410		chr14:65821669-65821764(-)
ENSMUSG00000018481	-2.16279	Appbp2	I1-3	upregulated	4973604	6.5906	10.4314	0.00333396	0.86253	0.0144384	6790374		chr11:85045117-85045621(-)
ENSMUSG00000034800	-2.16659	Zfp661	E2-2	upregulated	4326546	7.64162	7.26565	0.000816619	0.861834	0.226648	6890702	alt-5'|altPromoter	chr2:127410375-127410401(-)
ENSMUSG00000054277	-2.16719	Arfgap3	E16-1	upregulated	5222949	8.38642	8.79516	0.00222623	0.861834	0.129348	6837437		chr15:83133534-83133619(-)
ENSMUSG00000019978	-2.16871	Epb4.1l2	E16-2	upregulated	5120588	8.29755	10.3984	0.00152148	0.861834	-0.146772	6766705	cassette-exon	chr10:25210636-25210792(+)
ENSMUSG00000071454	-2.18041	Dtnb	I8-2	upregulated	5514537	5.34189	10.1329	0.000572491	0.861834	-0.0264375	6792942		chr12:3644555-3644823(+)
ENSMUSG00000066151	-2.19807	Fkbp15	I29-8	upregulated	5010227	8.13595	9.68478	0.00345062	0.86253	0.0216898	6922209		chr4:61963131-61963923(-)
ENSMUSG00000029088	-2.20164	Kcnip4	I6-14	upregulated	4556338	5.01793	11.4144	0.00467807	0.873601	0.0684733	6937986		chr5:48928812-48928996(-)
ENSMUSG00000033965	-2.20287	Slc16a2	E2-1	upregulated	4742381	4.4588	8.56714	0.00458797	0.871969	-0.0828933	7018664	alt-N-term	chrX:100929478-100929506(-)
ENSMUSG00000045636	-2.20634	Mtus1	I2-3	upregulated	4763696	5.26353	9.4133	0.00320704	0.86253	-0.0535133	6981905		chr8:42194393-42194569(-)
ENSMUSG00000021838	-2.21754	Samd4	I6-17	upregulated	4402829	5.57596	9.55419	0.00443344	0.869031	-0.0340083	6818667		chr14:47661306-47661491(+)
ENSMUSG00000020696	-2.22064	Rffl	I4-1	upregulated	4490686	7.36192	9.20882	0.00398451	0.86253	-0.0866222	6790226		chr11:82647021-82647224(-)
ENSMUSG00000048915	-2.23366	Efna5	I1-9	upregulated	4827228	5.05728	9.36386	0.00184727	0.861834	0.0816367	6856480		chr17:63213946-63214219(-)
ENSMUSG00000037533	-2.2373	Rapgef6	E7-4	upregulated	5156208	5.81451	8.96991	0.000591575	0.861834	0.0113367	6781032		chr11:54410723-54411006(+)
ENSMUSG00000028525	-2.24444	Pde4b	I4-15	upregulated	4546462	7.85877	10.9936	0.00371263	0.86253	-0.0697057	6915856		chr4:101980668-101981393(+)
ENSMUSG00000026888	-2.2478	Grb14	E15-2	upregulated	4986930	8.48036	8.63578	0.0033784	0.86253	0.0655167	6887282		chr2:64750603-64750752(-)
ENSMUSG00000042662	-2.24789	Dusp15	E6-2	upregulated	4313634	8.75944	10.0052	0.00161852	0.861834	0.0961644	6892190	alt-C-term	chr2:152770766-152770834(-)
ENSMUSG00000010517	-2.25019	Faf1	I14-4	upregulated	4582791	4.86065	9.31579	0.00233804	0.861834	-0.039194	6916263		chr4:109547729-109547765(+)
ENSMUSG00000061950	-2.2619	Ppp4r1	I5-1	upregulated	5279677	6.34777	10.0484	0.0036713	0.86253	0.229642	6851735		chr17:66150037-66150303(+)
ENSMUSG00000013539	-2.26737	D16H22S680E	I2-8	upregulated	4539536	4.29495	11.5725	0.000549083	0.861834	0.0302067	6844321		chr16:18331490-18331528(-)
ENSMUSG00000014195	-2.26822	Dnajc7	I9-1	upregulated	5492246	7.5599	9.88266	0.00125408	0.861834	-0.0332433	6791432		chr11:100453385-100454157(-)
ENSMUSG00000032740	-2.27777	Ccdc88a	E26-2	upregulated	5260790	7.25543	9.03086	0.00150464	0.861834	-0.003125	6779714		chr11:29397428-29397555(+)
ENSMUSG00000022149	-2.31602	C9	E3-2	upregulated	4708305	5.68069	4.74056	0.00428541	0.866439	0.065655	6828478		chr15:6408221-6408266(+)
ENSMUSG00000023013	-2.31665	Aqp2	E4-4	upregulated	5222936	5.75443	6.79683	0.00305299	0.86253	-0.135131	6833171		chr15:99414956-99414980(+)
ENSMUSG00000020436	-2.32013	Gabrg2	I6-6	upregulated	5079421	6.20159	12.3473	0.00235606	0.861834	-0.0717342	6787525		chr11:41758551-41758657(-)
ENSMUSG00000039115	-2.32068	Itga9	E15-1	upregulated	4847237	6.39766	7.39038	0.00422964	0.864477	0.115053	6992855		chr9:118598395-118598529(+)
ENSMUSG00000037996	-2.32092	Slc24a2	I7-5	upregulated	4456331	7.23804	12.3125	0.00486284	0.873601	-0.00413	6923083		chr4:86704624-86704959(-)
ENSMUSG00000024163	-2.32341	Mapk8ip3	E20-3	upregulated	4482980	6.22963	10.8438	0.00302508	0.86253	0.0803876	6854400		chr17:25038820-25039006(-)
ENSMUSG00000066149	-2.33142	Cdc26	I3-5	upregulated	4843149	5.92557	8.9653	0.00373361	0.86253	-0.206872	6927414		chr4:62056391-62056674(-)
ENSMUSG00000069601	-2.33345	Ank3	I49-8	upregulated	5562970	8.04741	11.2014	0.0046559	0.873601	-0.0442773	6768609		chr10:69475308-69475475(+)
ENSMUSG00000030058	-2.33741	Copg	I12-2	upregulated	5414332	5.2863	11.697	0.00255176	0.86253	0.0407217	6947737		chr6:87849097-87849150(+)
ENSMUSG00000037075	-2.33886	Rnf139	E2-5	upregulated	5495923	6.5506	8.89837	0.000970613	0.861834	0.123297	6830700		chr15:58733480-58733834(+)
ENSMUSG00000028163	-2.3441	Nfkb1	E27-2	upregulated	4501533	7.95214	7.59053	0.00361591	0.86253	-0.102262	6909648		chr3:135248325-135248349(-)
ENSMUSG00000028710	-2.36046	Atpaf1	I11-2	upregulated	4482321	5.22201	10.2856	0.000634151	0.861834	-0.105176	6916504		chr4:115490361-115490808(+)
ENSMUSG00000052921	-2.36205	Arhgef15	E16-3	upregulated	4408484	6.93125	7.86004	0.000729317	0.861834	0.155151	6789235		chr11:68757275-68757907(-)
ENSMUSG00000023036	-2.36475	Pcdhga11	I20-3	upregulated	5272074	6.8875	11.4476	0.00165478	0.861834	-0.115178	6860218		chr18:37944867-37945141(+)
ENSMUSG00000018442	-2.36583	Derl2	I2-2	upregulated	4767012	5.78957	5.96969	0.00484748	0.873601	-0.197105	6789476	intron-retention	chr11:70832060-70832088(-)
ENSMUSG00000058298	-2.37533	Mcm9	I6-1	upregulated	5209464	4.445	7.08848	0.00231993	0.861834	0.215582	6774006		chr10:53332779-53332926(-)
ENSMUSG00000030849	-2.37977	Fgfr2	I4-14	upregulated	4540256	5.99036	10.7086	0.00201641	0.861834	-0.195578	6971696		chr7:140014210-140014413(-)
ENSMUSG00000048264	-2.38031	Dip2c	I1-11	upregulated	5477291	7.28708	9.36648	0.000374269	0.822314	-0.0114487	6804704		chr13:9296599-9296887(+)
ENSMUSG00000049252	-2.38295	Lrp1b	I3-30	upregulated	4943205	7.75648	8.86571	0.000729645	0.861834	-0.0835375	6886244		chr2:41988032-41988385(-)
ENSMUSG00000030811	-2.39234	Fbxl19	I8-1	upregulated	5525426	6.99833	7.28458	0.00360207	0.86253	-0.0168452	6964345		chr7:134896043-134896097(+)
ENSMUSG00000007476	-2.40635	Lrrc8a	E3-2	upregulated	4809533	8.42594	9.47875	0.00235145	0.861834	0.103624	6876052		chr2:30111436-30111495(+)
ENSMUSG00000025035	-2.41449	Arl3	I5-5	upregulated	4959456	6.31535	10.7451	0.00432562	0.86747	0.14099	6873421		chr19:46611607-46612149(-)
ENSMUSG00000000708	-2.41662	Kat2b	I3-2	upregulated	5043759	5.73303	7.4992	0.0048258	0.873601	-0.203443	6851103		chr17:53731128-53731195(+)
ENSMUSG00000031385	-2.41667	Plxnb3	E2-3	upregulated	4677799	9.77319	9.64466	0.00208984	0.861834	0.0649711	7011951	cassette-exon	chrX:71004799-71004916(+)
ENSMUSG00000037736	-2.4205	Limch1	I3-11	upregulated	4378662	6.86834	9.43262	0.00248167	0.861834	-0.0232811	6931362		chr5:67281386-67281418(+)
ENSMUSG00000014329	-2.42271	Bicc1	I4-2	upregulated	5279364	10.6601	7.04606	0.000566087	0.861834	-0.216759	6774907		chr10:70480660-70480684(-)
ENSMUSG00000031376	-2.42648	Atp2b3	I6-1	upregulated	5492303	8.21965	10.5544	0.000807797	0.861834	-0.00516315	7011937		chrX:70775774-70775972(+)
ENSMUSG00000028760	-2.44043	Eif4g3	I30-3	upregulated	4860217	7.93999	10.3141	0.000305498	0.789712	0.0500356	6917972		chr4:137735557-137735849(+)
ENSMUSG00000025232	-2.44386	Hexa	I1-2	upregulated	4448422	5.95721	9.03554	0.00275317	0.86253	-0.0991736	6989553		chr9:59388301-59388344(+)
ENSMUSG00000057406	-2.4481	Whsc1	E2-2	upregulated	5549980	9.51336	10.2843	0.00131848	0.861834	0.00507333	6929821	cassette-exon|cassetteExon	chr5:34164342-34164377(+)
ENSMUSG00000026134	-2.4505	Prim2	E15-3	upregulated	5071952	5.1643	8.24442	0.00271275	0.86253	-0.250952	6757732		chr1:33510728-33510758(-)
ENSMUSG00000056692	-2.45162	D17Wsu92e	I4-2	upregulated	4331801	6.59808	10.6106	0.00345153	0.86253	0.04468	6854551		chr17:27898234-27898307(-)
ENSMUSG00000039879	-2.45186	Heca	I2-3	upregulated	5563903	3.70407	7.75275	0.00444997	0.869335	-0.07904	6772370		chr10:17632574-17632837(-)
ENSMUSG00000001576	-2.45366	Ergic1	I13-2	upregulated	5530845	4.43252	10.7914	0.00395415	0.86253	0.0156567	6849456		chr17:26784272-26784863(+)
ENSMUSG00000042105	-2.45438	Inpp5f	E23-3	upregulated	5595921	11.1529	9.88281	6.29333e-05	0.789712	-0.635062	6964428		chr7:135838547-135838693(+)
ENSMUSG00000004187	-2.45476	Kifc2	I1-2	upregulated	5385304	6.67455	9.63806	0.00319167	0.86253	-0.176362	6831687		chr15:76490885-76490986(+)
ENSMUSG00000070953	-2.45641	Rabepk	I8-1	upregulated	4896314	5.59678	8.70459	0.00155353	0.861834	0.0544033	6886009		chr2:34636080-34636115(-)
ENSMUSG00000009545	-2.46066	Kcnq1	I11-4	upregulated	4757802	3.75311	6.19254	0.000265516	0.789712	0.0120613	6965319		chr7:150401799-150402287(+)
ENSMUSG00000027882	-2.46534	Stxbp3a	I16-1	upregulated	5326990	6.41513	9.33766	0.00316508	0.86253	-0.276539	6908146		chr3:108601948-108602084(-)
ENSMUSG00000014763	-2.46869	Fam120b	I8-1	upregulated	5287167	7.14646	9.04254	0.0039161	0.86253	-0.14298	6848854		chr17:15560049-15560078(+)
ENSMUSG00000086488	-2.472	1600020E01Rik	I2-1	upregulated	5328977	4.3962	5.6691	0.0032767	0.86253	0.155307	6947638		chr6:86490788-86491026(+)
ENSMUSG00000042323	-2.47431	Pbrm1	E10-1	upregulated	4720952	6.70235	8.67222	0.00330217	0.86253	-0.039107	6817960		chr14:31852125-31852170(+)
ENSMUSG00000072387	-2.47472	Gm10356	U1-7	upregulated	5011510	3.70632	9.70986	0.000763298	0.861834	-0.00709444	6904770		chr3:46782146-46782177(-)
ENSMUSG00000035954	-2.47915	Dock4	I1-14	upregulated	5434067	4.10891	9.5561	0.000618184	0.861834	-0.0630833	6794643		chr12:41190288-41190511(+)
ENSMUSG00000017561	-2.48605	Crlf3	E7-1	upregulated	5162526	6.81683	8.14485	0.00102852	0.861834	-0.03457	6790079	cassette-exon	chr11:79862094-79862119(-)
ENSMUSG00000026155	-2.49106	Smap1	U15-6	upregulated	4537047	6.45166	11.5213	0.000267179	0.789712	-0.0592667	6757423		chr1:23840347-23840455(-)
ENSMUSG00000026970	-2.4951	Rbms1	E16-1	upregulated	4865884	8.10847	8.76553	0.000829419	0.861834	-0.224605	6887089	cassette-exon|cassetteExon	chr2:60597816-60597852(-)
ENSMUSG00000030703	-2.49757	Gdpd3	E5-1	upregulated	4487603	5.60858	5.90182	0.00122902	0.861834	2.38096	6964245		chr7:133911081-133911172(+)
ENSMUSG00000020220	-2.50067	Vps13d	I60-4	upregulated	5525212	6.16387	9.06697	0.00114956	0.861834	-0.0505294	6927999		chr4:144648668-144648981(-)
ENSMUSG00000066392	-2.50093	Nrxn3	I18-17	upregulated	4645247	6.14713	11.7772	0.00292141	0.86253	0.0121456	6796835		chr12:90666748-90666955(+)
ENSMUSG00000001986	-2.51359	Gria3	I3-8	upregulated	5002085	6.73224	9.62623	0.00229083	0.861834	0.00275667	7010837		chrX:38764941-38765321(+)
ENSMUSG00000044086	-2.51424	Lmod3	E3-1	upregulated	5142716	4.99212	5.43144	0.0014546	0.861834	-0.49704	6955772		chr6:97188579-97188793(-)
ENSMUSG00000031622	-2.51892	Sin3b	I17-2	upregulated	4569904	7.05887	9.10058	0.000435128	0.829507	0.00241333	6977177		chr8:75278900-75279063(+)
ENSMUSG00000026646	-2.52228	Suv39h2	E7-4	upregulated	5086342	5.19204	6.24905	0.00239696	0.861834	-0.00577	6884351		chr2:3373294-3373811(-)
ENSMUSG00000025950	-2.52702	Idh1	I6-1	upregulated	4651620	6.90185	9.85838	0.00205232	0.861834	-0.0334217	6759396		chr1:65214590-65214732(-)
ENSMUSG00000018707	-2.53226	Dync1h1	I43-2	upregulated	5379006	7.22948	11.6706	0.000110009	0.789712	-0.0155117	6798108		chr12:111885754-111885902(+)
ENSMUSG00000034557	-2.55123	Zfyve9	I5-1	upregulated	4894180	5.94621	9.32435	0.00297063	0.86253	-0.0999633	6924378		chr4:108368036-108368292(-)
ENSMUSG00000054942	-2.55316	Fam73a	I7-3	upregulated	4378397	6.12847	10.0945	0.00391277	0.86253	-0.084826	6910622		chr3:151971581-151971778(-)
ENSMUSG00000029705	-2.56604	Cux1	I2-15	upregulated	4358879	5.34354	9.41594	0.00102665	0.861834	-0.0998892	6942496		chr5:137009693-137010191(-)
ENSMUSG00000021071	-2.56694	Trim9	I9-8	upregulated	4593549	8.38623	10.0458	0.00114902	0.861834	-0.001269	6801507		chr12:71358994-71359038(-)
ENSMUSG00000024268	-2.57206	Celf4	I2-18	upregulated	4506171	6.12932	10.1806	0.00038956	0.822314	0.025661	6864062		chr18:25786247-25786536(-)
ENSMUSG00000006014	-2.57349	Prg4	E3-1	upregulated	5614869	7.74878	7.94755	0.00312404	0.86253	0.23168	6762967	cassette-exon	chr1:152309234-152309321(-)
ENSMUSG00000026082	-2.57795	Rev1	I4-2	upregulated	4414305	6.49301	7.97291	0.00248626	0.861834	-0.402407	6757994		chr1:38152476-38152595(-)
ENSMUSG00000031608	-2.57811	Galnt7	I1-24	upregulated	5138828	5.25515	7.97372	0.00424734	0.864477	0.154628	6982700		chr8:60109387-60109665(-)
ENSMUSG00000025939	-2.58718	Ube2w	I6-5	upregulated	4491727	6.22206	10.616	0.00229468	0.861834	-0.168347	6757128		chr1:16566120-16566358(-)
ENSMUSG00000042726	-2.5882	Trafd1	I11-1	upregulated	5416855	7.37406	8.75446	0.00248682	0.861834	0.0791978	6941672		chr5:121824756-121824935(-)
ENSMUSG00000022517	-2.59019	Mgrn1	I10-1	upregulated	4533841	7.09264	10.477	0.00260717	0.86253	-0.0420678	6839078		chr16:4924052-4924219(+)
ENSMUSG00000031729	-2.59526	2400003C14Rik	I8-1	upregulated	5082340	7.25015	10.9062	0.00123694	0.861834	0.10168	6985263	intron-retention	chr8:112199946-112200565(-)
ENSMUSG00000025534	-2.5958	Gusb	E3-5	upregulated	4443032	6.40316	9.59249	0.00431885	0.86747	-0.0375533	6942192	bleedingExon|exon-region-exclusion|exon-region-exclusion|retainedIntron	chr5:130475677-130475754(-)
ENSMUSG00000024483	-2.60222	Ankhd1	E36-2	upregulated	4505702	7.37589	9.09237	0.00158706	0.861834	0.126941	6860119	alt-C-term	chr18:36818314-36818850(+)
ENSMUSG00000030409	-2.61073	Dmpk	E1-1	upregulated	5306277	6.88461	7.8312	0.00443513	0.869031	-0.264647	6958984	alt-N-term	chr7:19669187-19669298(+)
ENSMUSG00000028176	-2.61962	Lrrc7	I1-1	upregulated	4964671	6.90512	8.93176	0.00166924	0.861834	0.157565	6910960		chr3:158221000-158221449(-)
ENSMUSG00000024505	-2.61987	Dtwd2	E2-1	upregulated	4610164	3.8495	7.87087	0.00211992	0.861834	-0.0242967	6865381	cassette-exon	chr18:49893643-49893734(-)
ENSMUSG00000029823	-2.62131	Luc7l2	E4-1	upregulated	4789518	7.36636	9.26827	0.00147214	0.861834	0.113878	6945555		chr6:38515531-38515588(+)
ENSMUSG00000022205	-2.62475	Sub1	E7-3	upregulated	4417249	6.33232	11.5612	0.00297748	0.86253	0.03981	6834031		chr15:11913735-11913762(-)
ENSMUSG00000002365	-2.62769	Snx9	I1-5	upregulated	4462773	6.8313	7.94476	0.00436335	0.867857	-0.0695517	6848504		chr17:5853607-5853725(+)
ENSMUSG00000012114	-2.62906	Med15	I6-2	upregulated	5193308	7.48255	8.51849	0.00242816	0.861834	0.106978	6844291		chr16:17683174-17683208(-)
ENSMUSG00000041112	-2.63119	Elmo1	I18-8	upregulated	5180065	4.93672	9.99328	0.00174766	0.861834	0.0227333	6805158		chr13:20590285-20590399(+)
ENSMUSG00000053617	-2.63139	Sh3pxd2a	I6-3	upregulated	5326259	6.76601	7.97998	0.00344303	0.86253	-0.162291	6873503		chr19:47406853-47406976(-)
ENSMUSG00000027951	-2.63152	Adar	I8-2	upregulated	5144167	7.08445	9.76566	0.00406209	0.86253	0.0363783	6899262		chr3:89546133-89546617(+)
ENSMUSG00000036181	-2.63232	Hist1h1c	U1-1	upregulated	5309357	5.72109	9.99126	0.00456828	0.871969	-0.830463	6805381		chr13:23832295-23832475(+)
ENSMUSG00000030884	-2.63806	Uqcrc2	E14-2	upregulated	5158492	6.92891	12.1759	0.00355484	0.86253	-0.0492947	6963946		chr7:127801238-127801580(+)
ENSMUSG00000028797	-2.65485	2510006D16Rik	I7-3	upregulated	4504235	5.16668	9.79452	0.00083221	0.861834	0.0713278	6917312		chr4:129286968-129287231(+)
ENSMUSG00000030058	-2.6566	Copg	I1-4	upregulated	5611562	5.82749	11.697	0.00392921	0.86253	0.0407217	6947737		chr6:87838608-87838693(+)
ENSMUSG00000031996	-2.65707	Aplp2	I7-2	upregulated	5576832	6.92774	11.6042	0.000272264	0.789712	0.0842633	6994356		chr9:30974416-30974652(-)
ENSMUSG00000052698	-2.6596	Tln2	I64-1	upregulated	4880494	6.13052	8.77175	0.00186393	0.861834	0.0234352	6996451		chr9:67075954-67076089(-)
ENSMUSG00000060882	-2.66622	Kcnd2	I1-6	upregulated	4642031	6.53122	10.2604	0.000872531	0.861834	0.002213	6944514		chr6:21183695-21183808(+)
ENSMUSG00000029635	-2.66763	Cdk8	I2-2	upregulated	5080776	5.58649	9.71356	0.00302107	0.86253	-0.083832	6935524		chr5:147071368-147071929(+)
ENSMUSG00000030703	-2.67337	Gdpd3	E6-1	upregulated	5288148	4.89521	5.90182	0.00313085	0.86253	2.38096	6964245		chr7:133911277-133911333(+)
ENSMUSG00000073563	-2.67877	Csnk1g3	E3-1	upregulated	4522482	7.33769	8.73322	0.0037154	0.86253	0.0283252	6860967		chr18:54062523-54062547(+)
ENSMUSG00000025035	-2.69047	Arl3	I3-3	upregulated	5571357	6.32872	10.7451	0.00124774	0.861834	0.14099	6873421		chr19:46624784-46624989(-)
ENSMUSG00000020061	-2.70539	Mybpc1	I2-1	upregulated	5483036	5.35638	7.64737	0.00136153	0.861834	-0.889492	6775854		chr10:88048327-88048404(-)
ENSMUSG00000014778	-2.70692	Fhod1	E15-1	upregulated	4588673	7.466	7.52697	0.00433818	0.86775	-0.248472	6984966		chr8:107855273-107855346(-)
ENSMUSG00000020368	-2.71108	Canx	I1-47	upregulated	4682774	1.90645	12.5613	0.00373454	0.86253	0.0136689	6788020		chr11:50125923-50125958(-)
ENSMUSG00000038696	-2.71375	Mapkap1	I9-1	upregulated	5119365	4.55904	9.57938	0.00320816	0.86253	0.0589289	6876310		chr2:34335989-34336405(+)
ENSMUSG00000028969	-2.71552	Cdk5	I10-1	upregulated	4488605	8.18399	10.6033	0.00198296	0.861834	0.172062	6936725		chr5:23925516-23925590(-)
ENSMUSG00000023473	-2.71612	Celsr3	E4-1	upregulated	4793374	9.08916	8.17894	0.0041299	0.862643	0.281531	6992373		chr9:108735499-108735582(+)
ENSMUSG00000022992	-2.71674	2310037I24Rik	E9-2	upregulated	5486233	7.93933	9.87851	0.00274861	0.86253	0.0963367	6838382	alt-5'|altFivePrime	chr15:98354895-98354989(-)
ENSMUSG00000049791	-2.72286	Fzd4	E1-1	upregulated	4612228	7.90785	7.42561	0.000774905	0.861834	0.232422	6962444		chr7:96553013-96553178(+)
ENSMUSG00000017837	-2.72521	Nkiras2	E6-2	upregulated	4454617	4.90303	8.39525	0.00066422	0.861834	-0.203833	6784207		chr11:100485750-100486213(+)
ENSMUSG00000025314	-2.72641	Ptprj	I3-7	upregulated	4355184	7.25026	10.183	0.00186366	0.861834	0.0579683	6888696		chr2:90361985-90362524(-)
ENSMUSG00000048332	-2.74231	Lhfp	I2-17	upregulated	4865506	7.35795	8.98914	0.00216501	0.861834	0.00971048	6897487		chr3:52894445-52895327(+)
ENSMUSG00000025478	-2.74483	Dpysl4	E13-1	upregulated	5062991	5.97869	8.49892	0.00409178	0.862643	0.172777	6965024		chr7:146284411-146284534(+)
ENSMUSG00000033237	-2.75268	Arid2	E22-5	upregulated	5570885	5.89045	8.90688	0.00429573	0.867031	-0.0720908	6832947		chr15:96235254-96235376(+)
ENSMUSG00000003810	-2.75321	Mast2	I6-5	upregulated	4567421	7.61213	10.4644	0.0015679	0.861834	0.0882483	6924784		chr4:116055186-116055451(-)
ENSMUSG00000053641	-2.76701	Dennd4a	I15-1	upregulated	4704760	5.81139	10.5082	0.00328342	0.86253	0.0258817	6989901		chr9:64715785-64715883(+)
ENSMUSG00000063796	-2.76729	Slc22a8	I9-1	upregulated	4644128	6.65103	8.80187	0.00443706	0.869031	-0.0357238	6867947		chr19:8683907-8683950(+)
ENSMUSG00000055320	-2.77029	Tead1	E2-1	upregulated	5371053	5.62888	8.32697	0.00430214	0.867055	-0.104154	6963548	cassette-exon	chr7:119835242-119835395(+)
ENSMUSG00000076435	-2.77304	Acsf2	E17-1	upregulated	5056457	6.90724	7.82259	0.000733393	0.861834	0.0879221	6790960		chr11:94419621-94419670(-)
ENSMUSG00000040565	-2.77893	Btaf1	I19-3	upregulated	5549481	5.24716	7.77008	0.000149868	0.789712	0.126909	6869452		chr19:37058607-37058697(+)
ENSMUSG00000030763	-2.78514	Lcmt1	E5-1	upregulated	5392020	8.96427	8.96586	0.00312277	0.86253	-0.216071	6964086		chr7:130547938-130547997(+)
ENSMUSG00000028291	-2.78612	Akirin2	I4-1	upregulated	5399495	7.55934	10.0144	0.000513252	0.861834	-0.136695	6912582		chr4:34512635-34513001(+)
ENSMUSG00000022010	-2.79472	Tsc22d1	I2-12	upregulated	5487303	8.92144	12.0001	0.00148816	0.861834	0.0466178	6820381		chr14:76838110-76838446(+)
ENSMUSG00000026335	-2.79643	Pam	I6-2	upregulated	5037467	3.91162	11.835	0.00432354	0.86747	-0.156165	6760917		chr1:99850166-99850435(-)
ENSMUSG00000031626	-2.80309	Sorbs2	I33-5	upregulated	4660316	7.6512	10.4613	0.000341226	0.806387	0.0351433	6975861		chr8:46896801-46896931(+)
ENSMUSG00000060450	-2.80465	Rnf14	E3-1	upregulated	5073500	10.1871	12.1338	0.00269816	0.86253	0.0604889	6860254	cassette-exon|cassetteExon	chr18:38457157-38457228(+)
ENSMUSG00000042105	-2.81741	Inpp5f	E23-4	upregulated	5132656	10.6961	9.88281	0.000276905	0.789712	-0.635062	6964428		chr7:135838709-135838834(+)
ENSMUSG00000028102	-2.84077	Pex11b	E12-1	upregulated	4640546	7.5934	10.101	0.00486327	0.873601	0.174843	6899767		chr3:96455240-96455276(+)
ENSMUSG00000038594	-2.84347	Gm9766	I3-8	upregulated	4956536	5.24809	7.83184	0.00398393	0.86253	0.147028	6773994		chr10:53053742-53054161(-)
ENSMUSG00000028080	-2.84665	Lrba	I38-5	upregulated	5451882	6.01664	9.30524	0.0025734	0.86253	-0.147389	6898954		chr3:86310798-86311008(+)
ENSMUSG00000038894	-2.85768	Irs2	I1-7	upregulated	4948749	6.10374	9.5861	0.00187604	0.861834	-0.0122367	6980362		chr8:10991935-10992108(-)
ENSMUSG00000031708	-2.87022	Tecr	I1-13	upregulated	5187119	8.8356	13.0099	0.00390822	0.86253	0.146896	6983790		chr8:86108803-86108892(-)
ENSMUSG00000037815	-2.87112	Ctnna1	E8-2	upregulated	5287731	5.79631	9.79084	0.00345162	0.86253	-0.137413	6860001	alt-N-term	chr18:35374958-35375028(+)
ENSMUSG00000027131	-2.87187	Tmem85	U5-2	upregulated	5398896	7.94041	11.1772	0.00470364	0.873601	0.0201389	6889760		chr2:112200404-112202786(-)
ENSMUSG00000028949	-2.87953	Smarcd3	E9-1	upregulated	4622976	5.75668	10.1367	0.00388297	0.86253	-0.0290783	6936750	alt-3'	chr5:24099592-24099637(-)
ENSMUSG00000021221	-2.88551	Dpf3	I3-27	upregulated	4935461	4.38042	8.07235	4.5871e-05	0.789712	0.0602983	6802262		chr12:84642486-84642516(-)
ENSMUSG00000027309	-2.88811	4930402H24Rik	I1-1	upregulated	5535579	7.63738	9.70486	0.000909655	0.861834	-0.05447	6890967		chr2:130700120-130700148(-)
ENSMUSG00000056158	-2.89166	Car10	I5-6	upregulated	5225052	6.02434	11.9885	0.0031816	0.86253	0.106572	6783586		chr11:93187845-93188218(+)
ENSMUSG00000023051	-2.90797	Tarbp2	E2-4	upregulated	4919202	4.49085	7.78837	0.00319896	0.86253	0.0571	6833430		chr15:102349765-102350082(+)
ENSMUSG00000079444	-2.92609	Prickle4	E3-3	upregulated	5240980	5.11047	6.96285	0.00376187	0.86253	-0.159743	6855785		chr17:47829189-47829270(-)
ENSMUSG00000022883	-2.94394	Robo1	I18-5	upregulated	4993138	3.85514	9.15254	0.00496405	0.873601	0.0409346	6842326		chr16:72988481-72988530(+)
ENSMUSG00000020459	-2.97302	Mtif2	I6-7	upregulated	5025119	3.96554	8.46658	0.00223919	0.861834	0.00914556	6779718		chr11:29436399-29436778(+)
ENSMUSG00000034518	-2.97355	Hmgxb4	I7-1	upregulated	5175684	6.3162	8.48575	0.00320527	0.86253	-0.147993	6977251		chr8:77544314-77544401(+)
ENSMUSG00000022494	-2.98712	Shisa9	I4-10	upregulated	5001230	4.82852	9.0225	0.00384817	0.86253	-0.168152	6839429		chr16:12080459-12080693(+)
ENSMUSG00000008658	-2.99159	Rbfox1	I2-13	upregulated	5492601	6.05011	11.1797	0.00415915	0.86322	-0.0082625	6839135		chr16:6266057-6266221(+)
ENSMUSG00000027680	-3.00718	Fxr1	I18-2	upregulated	4312874	7.36857	10.1973	0.00347749	0.86253	-0.0180536	6896667		chr3:33963584-33963894(+)
ENSMUSG00000021911	-3.01387	Parg	E18-1	upregulated	5187957	6.21853	10.4918	0.00362204	0.86253	0.00869333	6818067	cassette-exon	chr14:33095075-33095107(+)
ENSMUSG00000020111	-3.0179	Cbara1	E8-1	upregulated	5263066	8.01396	9.583	8.07076e-05	0.789712	0.0604067	6768143	cassette-exon	chr10:59225242-59225378(+)
ENSMUSG00000004789	-3.02465	Dlst	I12-1	upregulated	4408926	5.81683	10.1928	0.00497219	0.873601	0.0916526	6796658		chr12:86470385-86470678(+)
ENSMUSG00000030826	-3.03058	Bcat2	U15-1	upregulated	5460791	5.3662	7.48917	0.00261806	0.86253	-0.258072	6960382		chr7:52851023-52851385(+)
ENSMUSG00000024294	-3.03723	Mib1	I13-2	upregulated	4541587	7.06366	11.9406	0.00309906	0.86253	-0.066225	6858819		chr18:10779465-10779696(+)
ENSMUSG00000041133	-3.05365	Smc1a	I18-4	upregulated	4766604	6.29762	8.79198	0.00165881	0.861834	0.115588	7014558		chrX:148492367-148492740(+)
ENSMUSG00000014195	-3.05515	Dnajc7	I1-4	upregulated	5296242	5.26363	9.88266	0.00126351	0.861834	-0.0332433	6791432		chr11:100477592-100477994(-)
ENSMUSG00000045482	-3.05655	Trrap	E62-1	upregulated	4947997	7.01833	10.2464	0.00213064	0.861834	0.118668	6935463		chr5:145599564-145599997(+)
ENSMUSG00000040462	-3.05768	Os9	E11-2	upregulated	4635354	6.84843	9.37337	0.00222014	0.861834	0.0416045	6777906		chr10:126535574-126535599(-)
ENSMUSG00000024410	-3.08378	3110002H16Rik	E16-5	upregulated	5207461	7.00022	8.61301	0.00193327	0.861834	0.237666	6858895		chr18:12347681-12347720(+)
ENSMUSG00000033849	-3.10289	B3galt2	E2-6	upregulated	4544738	8.66093	8.57275	0.00118189	0.861834	0.139089	6753700		chr1:145496304-145496583(+)
ENSMUSG00000020467	-3.10519	Efemp1	E1-1	upregulated	4896803	8.21848	7.80966	0.00150492	0.861834	-0.851827	6779672		chr11:28753230-28753299(+)
ENSMUSG00000023927	-3.11096	Satb1	I12-7	upregulated	4684972	4.24377	9.61123	0.00216618	0.861834	-0.165995	6855981		chr17:51930848-51931027(-)
ENSMUSG00000044499	-3.12501	Hs3st5	I4-6	upregulated	4461109	7.11419	8.94304	0.00294104	0.86253	0.181011	6767148		chr10:36455758-36456140(+)
ENSMUSG00000002010	-3.13794	Idh3g	E5-1	upregulated	5171518	8.3797	11.9618	0.00099155	0.861834	0.0427683	7017595	exon-region-exclusion|exon-region-exclusion	chrX:71027550-71027630(-)
ENSMUSG00000038718	-3.13992	Pbx3	I4-2	upregulated	4977947	5.13813	10.6549	0.00395479	0.86253	0.0199867	6885969		chr2:34076008-34076672(-)
ENSMUSG00000026851	-3.14033	BC005624	E9-3	upregulated	5014465	7.94451	11.0195	0.00332926	0.86253	-0.0485067	6885808		chr2:30828040-30828234(-)
ENSMUSG00000030002	-3.15504	Dusp11	I3-2	upregulated	4774179	9.15967	9.64611	0.00344177	0.86253	0.188703	6955175		chr6:85905422-85905543(-)
ENSMUSG00000086180	-3.1558	Rmst	E3-2	upregulated	5060823	7.15875	9.95256	0.00158213	0.861834	-0.0459344	6776014	altFinish|bleedingExon	chr10:91624877-91624907(-)
ENSMUSG00000029478	-3.16263	Ncor2	E20-1	upregulated	5242860	5.79997	9.61018	0.00178036	0.861834	-0.0447487	6941932	bleedingExon	chr5:125536257-125536289(-)
ENSMUSG00000040354	-3.1747	Mars	E7-2	upregulated	4590016	6.19096	7.87129	0.00123834	0.861834	0.0393578	6777929		chr10:126744969-126745284(-)
ENSMUSG00000029432	-3.177	Gbas	E8-1	upregulated	5492474	7.67275	9.74561	0.000379881	0.822314	-0.0717756	6934634		chr5:130258329-130258950(+)
ENSMUSG00000022043	-3.1824	Trim35	U6-1	upregulated	5553007	7.15643	9.62184	0.00196664	0.861834	-0.159258	6819901		chr14:66930550-66930813(+)
ENSMUSG00000070939	-3.18991	Tgfbrap1	I7-5	upregulated	4843123	7.85005	9.35244	0.000199333	0.789712	-0.026914	6758258		chr1:43117173-43117697(-)
ENSMUSG00000019969	-3.19501	Psen1	I6-4	upregulated	5447145	7.1554	10.843	0.00279725	0.86253	0.0883127	6796540		chr12:85062401-85062730(+)
ENSMUSG00000014956	-3.21597	Ppp1cb	E5-1	upregulated	4391478	6.69845	12.1592	0.00283938	0.86253	0.043865	6929728	cassette-exon	chr5:32786026-32786053(+)
ENSMUSG00000042744	-3.21712	Gm15800	I63-2	upregulated	5025015	5.33129	10.0675	0.00163012	0.861834	0.054411	6934044		chr5:121802388-121802640(+)
ENSMUSG00000025224	-3.21912	Gbf1	I33-5	upregulated	5319254	7.23669	9.71204	0.00113907	0.861834	0.0451631	6870029		chr19:46357281-46357309(+)
ENSMUSG00000054976	-3.24081	9430031J16Rik	I4-2	upregulated	4920958	7.21066	9.55221	0.00358565	0.86253	0.105792	6751011		chr1:81106621-81107624(+)
ENSMUSG00000074892	-3.25487	B3galt5	I4-4	upregulated	4508449	6.41307	9.65142	0.00213058	0.861834	-0.214454	6843491		chr16:96518331-96518516(+)
ENSMUSG00000018765	-3.26611	Fxr2	E7-1	upregulated	5580136	6.66764	10.0597	0.000305987	0.789712	-0.08341	6782037		chr11:69457075-69457311(+)
ENSMUSG00000090015	-3.26848	Gm15446	E5-5	upregulated	4879184	5.70757	10.0994	0.00224132	0.861834	-0.0153067	6933389		chr5:110372082-110372360(+)
ENSMUSG00000021140	-3.2795	Pcnx	I30-1	upregulated	4794978	7.71778	9.25556	0.0015968	0.861834	-0.145874	6796485		chr12:83084806-83085532(+)
ENSMUSG00000004591	-3.28006	Pkn2	I18-1	upregulated	5447912	3.12203	8.65415	0.00276215	0.86253	0.0295258	6909993		chr3:142466310-142466513(-)
ENSMUSG00000035681	-3.28167	Kcnc2	I4-5	upregulated	5476410	4.98372	9.50467	3.84394e-05	0.789712	-0.0526833	6770751		chr10:111825374-111825413(+)
ENSMUSG00000071533	-3.2858	Pcnp	I1-1	upregulated	5399824	8.09531	11.815	0.000357799	0.814176	0.0169267	6846392		chr16:56028875-56029163(-)
ENSMUSG00000029121	-3.29842	Crmp1	I5-1	upregulated	4630270	6.76163	9.5902	0.00332364	0.86253	-0.099185	6930022		chr5:37665172-37665850(+)
ENSMUSG00000029179	-3.30277	Zcchc4	E15-6	upregulated	5268596	5.11663	8.81842	0.00147053	0.861834	0.002096	6930841		chr5:53211121-53211213(+)
ENSMUSG00000030703	-3.31356	Gdpd3	E8-1	upregulated	5172938	5.95907	5.90182	0.000287283	0.789712	2.38096	6964245		chr7:133914502-133914559(+)
ENSMUSG00000078671	-3.33091	Chd2	I27-1	upregulated	5284939	5.73847	8.72595	0.000650355	0.861834	0.103333	6968373		chr7:80608489-80608514(-)
ENSMUSG00000002107	-3.3341	Celf2	I8-37	upregulated	5004742	6.08604	10.1368	0.000488396	0.859496	0.130668	6884523		chr2:6681973-6682125(-)
ENSMUSG00000000838	-3.34665	Fmr1	E5-1	upregulated	4336749	4.6497	9.61045	0.00183205	0.861834	-0.0226375	7011757	altPromoter|bleedingExon	chrX:65947988-65948143(+)
ENSMUSG00000024043	-3.35082	Arhgap28	E6-1	upregulated	4465264	4.41785	5.49636	0.000356688	0.814176	-0.17753	6856796	cassette-exon	chr17:68230780-68230857(-)
ENSMUSG00000029213	-3.37101	Commd8	U8-2	upregulated	4581530	4.72971	7.95638	0.00253059	0.86253	-0.14271	6939047		chr5:72544103-72544327(-)
ENSMUSG00000052516	-3.38231	Robo2	I29-3	upregulated	5193301	4.30171	9.46192	0.00467832	0.873601	0.031738	6847090		chr16:73900470-73900985(-)
ENSMUSG00000024594	-3.38498	Prrc1	I7-3	upregulated	5313874	5.38032	7.78998	0.000445024	0.834926	0.0290622	6861175		chr18:57541639-57541682(+)
ENSMUSG00000032030	-3.38583	Cul5	E11-2	upregulated	5074836	5.79616	9.28278	0.000213816	0.789712	-0.0340017	6995718		chr9:53442034-53442070(-)
ENSMUSG00000034243	-3.38642	Golgb1	E22-1	upregulated	4367150	5.37855	8.02987	0.00285405	0.86253	0.0895467	6840776		chr16:36931300-36931603(+)
ENSMUSG00000040506	-3.39125	Ambra1	I16-1	upregulated	5460779	6.69591	10.4731	0.00140345	0.861834	0.09982	6879086		chr2:91736940-91737245(+)
ENSMUSG00000034156	-3.43168	Bzrap1	E24-1	upregulated	5101023	7.16888	9.74788	0.00467315	0.873601	0.0146622	6783337	altPromoter|bleedingExon	chr11:87592306-87592462(+)
ENSMUSG00000038759	-3.43583	Nup205	E37-1	upregulated	5467590	6.14383	8.56843	0.00183527	0.861834	0.0802575	6945366	cassette-exon	chr6:35186772-35186845(+)
ENSMUSG00000025034	-3.43767	Trim8	I1-2	upregulated	5426307	6.43647	9.44373	0.00284835	0.86253	-0.0789751	6870095		chr19:46586053-46586832(+)
ENSMUSG00000039477	-3.45234	Tnrc18	I5-1	upregulated	4986694	6.17165	8.3199	0.00356781	0.86253	0.0577792	6942847		chr5:143548441-143548599(-)
ENSMUSG00000058761	-3.45626	Rnf169	I4-5	upregulated	4803430	4.51035	8.85242	0.00296874	0.86253	0.033899	6969782		chr7:107078641-107079734(-)
ENSMUSG00000038412	-3.45708	Higd1a	I4-30	upregulated	5188878	3.32602	8.17885	0.00364175	0.86253	0.0609042	6999524		chr9:121425388-121425466(-)
ENSMUSG00000037852	-3.45915	Cpe	I1-13	upregulated	4450909	7.73165	11.6097	0.00382835	0.86253	-0.0299997	6982918		chr8:67137833-67138101(-)
ENSMUSG00000034312	-3.47629	Iqsec1	I1-4	upregulated	5542471	6.54283	9.567	0.00361561	0.86253	-0.00444	6955501		chr6:90749758-90750286(-)
ENSMUSG00000042709	-3.47804	Atpaf2	I2-3	upregulated	4453214	4.99058	8.27263	0.00139772	0.861834	-0.191788	6788744		chr11:60226957-60227221(-)
ENSMUSG00000051169	-3.49308	Rpusd3	E5-4	upregulated	5600117	6.64831	7.83149	0.00296609	0.86253	-0.0701533	6956556		chr6:113367135-113367163(-)
ENSMUSG00000056947	-3.49896	Mab21l1	U0-15	upregulated	4925363	3.47372	7.22371	0.00443803	0.869031	0.268863	6897627		chr3:55585677-55585738(+)
ENSMUSG00000028399	-3.50526	Ptprd	I1-3	upregulated	4335490	5.38804	10.8023	0.00134825	0.861834	-0.00449714	6922672		chr4:77856969-77857077(-)
ENSMUSG00000031532	-3.50868	Tmem66	U0-3	upregulated	5371587	6.06169	9.35335	0.00328247	0.86253	-0.0867658	6975307		chr8:35211195-35211312(+)
ENSMUSG00000061455	-3.51286	Stx17	I7-1	upregulated	4938636	3.64251	8.03454	0.00334942	0.86253	-0.0226056	6913317		chr4:48184332-48184359(+)
ENSMUSG00000005683	-3.51561	Cs	E11-3	upregulated	4708650	8.70572	11.3621	0.0020021	0.861834	0.105266	6771647		chr10:127798281-127798308(+)
ENSMUSG00000044033	-3.51815	Ccdc141	I4-4	upregulated	5491249	4.7791	8.91818	0.000888227	0.861834	-0.0796517	6888008		chr2:76986842-76987110(-)
ENSMUSG00000021033	-3.52937	Gstz1	I3-2	upregulated	5257604	6.02997	8.70703	0.00241715	0.861834	-0.177422	6796777		chr12:88498625-88498696(+)
ENSMUSG00000031592	-3.54039	Pcm1	E38-1	upregulated	4780239	7.06566	9.61139	0.0048426	0.873601	0.006745	6975701		chr8:42416250-42416274(+)
ENSMUSG00000039193	-3.55846	Nlrc4	I5-2	upregulated	4520123	4.00575	7.0034	0.00128219	0.861834	-0.0898722	6857222		chr17:74838303-74838629(-)
ENSMUSG00000005142	-3.57056	Man2b1	I4-1	upregulated	4782695	6.28252	9.52282	0.00376427	0.86253	-0.07036	6977797	intron-retention	chr8:87609553-87610679(+)
ENSMUSG00000021559	-3.57398	Dapk1	I12-1	upregulated	5491593	4.2046	8.53536	0.00301394	0.86253	0.261923	6807564		chr13:60825576-60825915(+)
ENSMUSG00000033900	-3.57677	Mtap9	I5-1	upregulated	5079033	4.72687	9.59916	0.00397047	0.86253	0.0837639	6898727		chr3:82175480-82175566(+)
ENSMUSG00000048234	-3.58164	Rnf149	I1-9	upregulated	4569613	5.9686	9.21697	0.00228427	0.861834	0.102637	6758032		chr1:39625102-39625359(-)
ENSMUSG00000038011	-3.58468	Dnahc10	E11-2	upregulated	5599665	4.86434	6.32766	0.00125709	0.861834	-0.011595	6934328		chr5:125227000-125227058(+)
ENSMUSG00000024096	-3.58728	Ralbp1	I7-1	upregulated	4483355	6.83484	8.46341	0.00160535	0.861834	-0.0538367	6856682		chr17:66205454-66206163(-)
ENSMUSG00000090112	-3.59872	Shprh	E21-1	upregulated	5533304	7.49902	8.79346	3.6201e-05	0.789712	0.0969012	6765971		chr10:10907743-10907822(+)
ENSMUSG00000033720	-3.60368	Sfxn5	E8-2	upregulated	4838968	6.27588	11.374	0.00220186	0.861834	-0.0483833	6955137	alt-C-term	chr6:85244974-85245084(-)
ENSMUSG00000036779	-3.6062	Papd5	I3-3	upregulated	5478131	5.82189	10.0259	0.00261346	0.86253	0.026226	6977972		chr8:90768669-90768834(+)
ENSMUSG00000032330	-3.60747	Cox7a2	E4-5	upregulated	5153018	7.6886	9.52336	0.00184088	0.861834	0.0912783	6997211		chr9:79602828-79603105(-)
ENSMUSG00000032186	-3.60836	Tmod2	I2-2	upregulated	5431949	6.79355	11.2398	0.000220956	0.789712	0.11014	6996952		chr9:75458053-75458118(-)
ENSMUSG00000041058	-3.62289	Wwp1	I10-4	upregulated	4815261	4.00529	9.81728	0.00167733	0.861834	-0.0654651	6920037		chr4:19572090-19572425(-)
ENSMUSG00000043531	-3.63394	Sorcs1	I25-2	upregulated	5001860	5.46937	8.35731	0.00255119	0.86253	0.0598569	6873663		chr19:50239578-50239603(-)
ENSMUSG00000032186	-3.63666	Tmod2	I13-7	upregulated	5324561	6.20118	11.2398	0.00354346	0.86253	0.11014	6996952		chr9:75412618-75412846(-)
ENSMUSG00000035722	-3.6386	Abca7	I34-1	upregulated	5421504	4.67156	8.40181	0.00337646	0.86253	-0.127396	6769180		chr10:79472802-79472885(+)
ENSMUSG00000022897	-3.64283	Dyrk1a	I2-4	upregulated	5163273	7.53082	10.8248	0.00175302	0.861834	-0.02451	6843393		chr16:94831353-94831661(+)
ENSMUSG00000028467	-3.65543	Gba2	E12-2	upregulated	4654560	7.32694	9.53347	0.00103033	0.861834	0.0624717	6921163	exon-region-exclusion|exon-region-exclusion	chr4:43580440-43580571(-)
ENSMUSG00000028136	-3.65741	Snx27	I1-2	upregulated	5110972	5.60893	11.1288	0.00173607	0.861834	0.106613	6907097		chr3:94380567-94380864(-)
ENSMUSG00000031916	-3.67056	Cog8	E5-5	upregulated	5199502	7.57848	9.23989	0.00464735	0.873601	0.0430167	6985086	exon-region-exclusion|exon-region-exclusion|retainedIntron	chr8:109572633-109572674(-)
ENSMUSG00000057842	-3.71529	Zfp595	E4-2	upregulated	5086093	4.72606	6.55826	0.00316157	0.86253	0.373138	6814028		chr13:67417234-67417259(-)
ENSMUSG00000002010	-3.71757	Idh3g	E5-2	upregulated	4520113	7.51729	11.9618	0.00153529	0.861834	0.0427683	7017595	exon-region-exclusion|exon-region-exclusion	chrX:71027470-71027507(-)
ENSMUSG00000023025	-3.73005	Larp4	I4-1	upregulated	5294006	3.55645	9.92205	0.00421982	0.864477	-0.0211133	6833216		chr15:99816147-99816334(+)
ENSMUSG00000022807	-3.73554	Osbpl11	I7-1	upregulated	4788664	4.7229	8.33998	0.00257954	0.86253	-0.0141142	6840612		chr16:33218865-33219268(+)
ENSMUSG00000021592	-3.74523	Arsk	E6-2	upregulated	5308022	5.11243	8.97261	0.00241121	0.861834	-0.168747	6814451	bleedingExon	chr13:76208581-76209465(-)
ENSMUSG00000075549	-3.7487	Gm6878	E4-1	upregulated	5468215	3.70369	5.33367	0.0015533	0.861834	0.0912525	6825518		chr14:67925073-67925101(-)
ENSMUSG00000079477	-3.7641	Rab7	I2-20	upregulated	4863239	4.18383	12.6969	0.00259426	0.86253	-0.00724583	6955311		chr6:87983819-87983850(-)
ENSMUSG00000030329	-3.76513	C530028O21Rik	E9-2	upregulated	5392390	8.93527	8.90056	0.00193715	0.861834	0.197683	6949833		chr6:124951712-124951953(+)
ENSMUSG00000037210	-3.76638	Fam193a	I17-1	upregulated	4656705	3.01187	9.61723	0.000593354	0.861834	0.0155778	6929842		chr5:34804917-34804961(+)
ENSMUSG00000056267	-3.77174	Cep70	I5-2	upregulated	4746293	6.56522	6.95972	0.000273823	0.789712	0.451412	6991777		chr9:99163809-99163910(+)
ENSMUSG00000033526	-3.77649	Ppip5k1	I28-2	upregulated	5091370	7.40366	9.60304	0.00359462	0.86253	0.173683	6890384		chr2:121150402-121150718(-)
ENSMUSG00000028917	-3.77665	Plekhm2	I2-11	upregulated	4690950	6.42244	11.6021	0.00160772	0.861834	-0.0626717	6926468		chr4:141199383-141199460(-)
ENSMUSG00000074652	-3.77802	Myh7b	E41-1	upregulated	4584429	5.06823	9.01372	0.00335134	0.86253	0.0567417	6882544		chr2:155459224-155459401(+)
ENSMUSG00000024220	-3.78207	Zfp523	I10-1	upregulated	5180151	9.42337	7.94937	0.000668098	0.861834	0.106847	6849532	intron-retention	chr17:28338562-28338678(+)
ENSMUSG00000028252	-3.79882	Ccnc	E6-2	upregulated	5224150	5.14367	9.18177	0.00442733	0.869031	0.230833	6912092	alt-5'	chr4:21662617-21662684(+)
ENSMUSG00000074365	-3.82607	Crxos1	E9-2	upregulated	4755811	1.97859	7.02559	0.00311045	0.86253	-0.225893	6958812		chr7:16489334-16489359(+)
ENSMUSG00000017119	-3.83196	Nbr1	E24-2	upregulated	5450035	8.04029	10.29	0.00249684	0.861834	0.00112267	6784279	alternative_polyA	chr11:101437798-101438183(+)
ENSMUSG00000024695	-3.83212	Zfp91	I2-5	upregulated	5032842	7.23972	9.3705	0.00216194	0.861834	0.112568	6871645		chr19:12858601-12858920(-)
ENSMUSG00000055320	-3.83272	Tead1	I6-1	upregulated	4654172	2.37114	8.32697	0.00462659	0.873601	-0.104154	6963548		chr7:119953271-119953562(+)
ENSMUSG00000025246	-3.83824	Tbl1x	I1-21	upregulated	5433342	6.22413	9.76511	0.00298988	0.86253	0.034042	7012151		chrX:74817784-74818124(+)
ENSMUSG00000062937	-3.84325	Mtap	I4-8	upregulated	4959209	4.87823	8.8347	0.00322843	0.86253	-0.10137	6915253		chr4:88815033-88815280(+)
ENSMUSG00000029823	-3.85414	Luc7l2	E3-1	upregulated	5440974	8.59327	9.26827	0.00126199	0.861834	0.113878	6945555	cassette-exon|cassetteExon	chr6:38509206-38509289(+)
ENSMUSG00000083844	-3.85503	2210015D19Rik	I2-1	upregulated	4815550	6.13959	7.7043	0.000136401	0.789712	0.00985667	6778505		chr11:5667401-5667475(+)
ENSMUSG00000023960	-3.85678	Enpp5	I3-1	upregulated	5175351	10.8795	11.9882	0.00172803	0.861834	-0.04027	6850552	intron-retention	chr17:44219902-44220441(+)
ENSMUSG00000041966	-3.86524	Dcaf17	I12-1	upregulated	5536883	5.30703	8.97181	0.00484162	0.873601	-0.028185	6877988		chr2:70923493-70923987(+)
ENSMUSG00000032026	-3.87063	Rexo2	E4-5	upregulated	4634841	5.93182	9.60945	0.00345935	0.86253	0.0311656	6995393		chr9:48282476-48282501(-)
ENSMUSG00000004892	-3.90947	Bcan	I8-1	upregulated	4688437	9.54322	10.5451	0.00251261	0.861834	-0.265313	6906694		chr3:87796779-87796919(-)
ENSMUSG00000068587	-3.91182	Mgam	E32-1	upregulated	4675037	3.79445	5.83378	0.00496638	0.873601	-0.210358	6945691		chr6:40636576-40636600(+)
ENSMUSG00000074818	-3.91233	Pdzd7	E17-2	upregulated	4439039	7.91542	7.09689	0.000125771	0.789712	0.315373	6873309		chr19:45102159-45102314(-)
ENSMUSG00000040785	-3.91515	Ttc3	I1-7	upregulated	4797695	9.31289	11.3752	0.0015823	0.861834	0.151793	6843384		chr16:94599896-94600085(+)
ENSMUSG00000030231	-3.9224	Plekha5	E19-1	upregulated	4748436	5.46312	9.22096	0.00242191	0.861834	0.090183	6950674	cassette-exon|cassetteExon	chr6:140517374-140517402(+)
ENSMUSG00000026576	-3.92503	Atp1b1	I2-12	upregulated	4761856	7.76565	12.5687	0.00467311	0.873601	0.0231908	6763706		chr1:166373492-166373651(-)
ENSMUSG00000023960	-3.92658	Enpp5	I3-2	upregulated	5157537	11.4352	11.9882	0.000298102	0.789712	-0.04027	6850552	intron-retention	chr17:44220761-44221957(+)
ENSMUSG00000042744	-3.92977	Gm15800	E60-2	upregulated	4343245	7.40547	10.0675	0.00239288	0.861834	0.054411	6934024	exon-region-exclusion|exon-region-exclusion	chr5:121793299-121793446(+)
ENSMUSG00000020349	-3.94204	Ppp2ca	E7-8	upregulated	4854168	6.69319	12.9045	0.000433323	0.829507	0.0218117	6780911		chr11:51940070-51940473(+)
ENSMUSG00000030064	-3.96296	Frmd4b	I2-9	upregulated	4736443	4.48445	8.49144	0.0034486	0.86253	-0.05655	6955782		chr6:97459448-97459564(-)
ENSMUSG00000045114	-3.96572	Prrt2	I3-1	upregulated	5545214	9.14336	11.4993	0.00280756	0.86253	-0.26938	6971317	intron-retention	chr7:134162552-134162895(-)
ENSMUSG00000027624	-3.97897	Epb4.1l1	I17-3	upregulated	4934402	7.4432	10.2301	0.000799235	0.861834	-0.17464	6882615		chr2:156349072-156349313(+)
ENSMUSG00000023923	-4.02054	Tbc1d5	I3-6	upregulated	4631840	3.11425	9.24889	0.00278978	0.86253	-0.0742804	6855935		chr17:51259075-51259285(-)
ENSMUSG00000030660	-4.0407	Pik3c2a	I4-1	upregulated	5254943	5.12284	8.71347	0.00331006	0.86253	0.0002925	6970750		chr7:123548072-123548186(-)
ENSMUSG00000039099	-4.04786	Wdr93	E11-1	upregulated	5485772	2.66795	5.65358	0.000157481	0.789712	0.126425	6961938		chr7:86915885-86915933(+)
ENSMUSG00000004892	-4.05147	Bcan	I4-1	upregulated	4945857	9.87694	10.5451	0.00237138	0.861834	-0.265313	6906694		chr3:87800396-87800442(-)
ENSMUSG00000022822	-4.05203	Abcc5	E8-1	upregulated	5235023	7.90202	9.99518	0.00131329	0.861834	-0.0899304	6844447	bleedingExon|exon-region-exclusion|exon-region-exclusion	chr16:20401109-20401138(-)
ENSMUSG00000027652	-4.06438	Ralgapb	I1-4	upregulated	5206132	5.81779	10.6573	0.00371175	0.86253	-0.10154	6882743		chr2:158243484-158243766(+)
ENSMUSG00000064115	-4.07468	Cadm2	I2-64	upregulated	4327998	3.45467	11.6706	0.00153944	0.861834	0.00395667	6846782		chr16:67180288-67180716(-)
ENSMUSG00000033720	-4.08024	Sfxn5	E7-2	upregulated	4644851	8.14883	11.374	0.00137741	0.861834	-0.0483833	6955137	alt-C-term	chr6:85249109-85249253(-)
ENSMUSG00000025757	-4.08584	Hspa4l	I5-1	upregulated	4466498	6.48791	10.0101	0.00122305	0.861834	0.0556683	6816575		chr3:40559142-40559417(+)
ENSMUSG00000032127	-4.11445	Vps11	I12-3	upregulated	4443805	7.79671	9.66596	0.000749615	0.861834	-0.118022	6995076		chr9:44158215-44158496(-)
ENSMUSG00000039428	-4.11741	Tmem135	I2-3	upregulated	5133628	5.86465	9.26358	0.00423935	0.864477	0.043498	6969196		chr7:96478036-96478278(-)
ENSMUSG00000005043	-4.12475	Sgsh	E9-1	upregulated	4557388	4.39857	8.33388	0.00328641	0.86253	-0.173912	6792702		chr11:119204837-119205117(-)
ENSMUSG00000019558	-4.13186	Slc6a8	I10-1	upregulated	5352336	6.58455	11.9425	0.00166213	0.861834	-0.0183627	7011944		chrX:70926057-70926271(+)
ENSMUSG00000053768	-4.15282	Chchd3	I4-3	upregulated	4766961	3.79825	11.2174	0.00200584	0.861834	-0.01092	6952529		chr6:32904063-32904900(-)
ENSMUSG00000040219	-4.15575	Ttc12	E3-3	upregulated	5506884	6.67866	7.37456	0.00390925	0.86253	-0.138188	6995453	exon-region-exclusion|exon-region-exclusion|retainedIntron	chr9:49280080-49280186(-)
ENSMUSG00000029144	-4.1797	Gtf3c2	E3-1	upregulated	4731488	8.05476	9.65393	0.0021503	0.861834	0.100295	6937068		chr5:31476884-31477147(-)
ENSMUSG00000027194	-4.18613	Ttc17	E3-1	upregulated	5206034	5.69553	8.5482	0.00037694	0.822314	0.0926267	6888962		chr2:94226282-94226308(-)
ENSMUSG00000058594	-4.18806	Fbxo18	E17-3	upregulated	4918609	2.27144	8.72311	0.00199276	0.861834	-0.0341422	6884721	bleedingExon|exon-region-exclusion|exon-region-exclusion|retainedIntron	chr2:11670501-11670529(-)
ENSMUSG00000003617	-4.1925	Cp	I20-2	upregulated	4423669	3.22732	8.95259	0.00185511	0.861834	-0.224701	6896032		chr3:19906062-19906282(+)
ENSMUSG00000029775	-4.20877	Klhdc10	E3-2	upregulated	5500258	6.2586	10.5611	0.000904042	0.861834	0.0104433	6945090	alt-3'|cassette-exon	chr6:30377647-30377702(+)
ENSMUSG00000034636	-4.21776	Zyg11b	I1-4	upregulated	4854115	6.82212	11.9161	0.00198526	0.861834	0.04649	6924376		chr4:107970431-107970732(-)
ENSMUSG00000055407	-4.2202	Mtap6	I5-9	upregulated	5565722	6.02334	9.67285	0.00493236	0.873601	-0.061415	6962873		chr7:106481716-106482092(+)
ENSMUSG00000030748	-4.22873	Il4ra	E5-1	upregulated	4904622	8.11936	7.96171	0.00317925	0.86253	0.599008	6964160	cassette-exon	chr7:132712538-132712570(+)
ENSMUSG00000051331	-4.23055	Cacna1c	I36-2	upregulated	4664184	5.3435	8.8521	0.00325668	0.86253	0.0591009	6956902		chr6:118599779-118600550(-)
ENSMUSG00000036104	-4.24012	Rab3gap1	I19-1	upregulated	5284567	3.94341	8.56468	0.00112865	0.861834	0.107659	6752873		chr1:129828192-129828458(+)
ENSMUSG00000004562	-4.28159	Arhgef40	E24-1	upregulated	4700383	7.96774	7.86094	0.000390312	0.822314	0.0125076	6819032	exon-region-exclusion|exon-region-exclusion	chr14:52624600-52624650(+)
ENSMUSG00000060862	-4.28456	Zbtb40	E20-6	upregulated	4868049	5.57105	7.08179	0.00194149	0.861834	0.185272	6926182		chr4:136537484-136537515(-)
ENSMUSG00000026824	-4.30297	Kcnj3	I3-1	upregulated	4663416	8.0553	11.5454	0.000467084	0.840262	-0.0848489	6877235		chr2:55354200-55354735(+)
ENSMUSG00000045114	-4.30581	Prrt2	I4-1	upregulated	4922086	8.22951	11.4993	0.00370786	0.86253	-0.26938	6971317	intron-retention	chr7:134162330-134162363(-)
ENSMUSG00000047037	-4.30677	Nipa1	I1-2	upregulated	4686852	7.25315	10.0163	0.00352686	0.86253	-0.0684733	6967542		chr7:63269560-63269767(-)
ENSMUSG00000013495	-4.32204	Tmem175	I1-4	upregulated	5039858	5.78795	9.40384	0.00188913	0.861834	-0.0965792	6933333		chr5:109064153-109064611(+)
ENSMUSG00000025790	-4.32241	Slco3a1	I4-5	upregulated	5269388	6.37037	11.1143	0.00147594	0.861834	0.26927	6968426		chr7:81636295-81636512(-)
ENSMUSG00000024242	-4.32258	Map4k3	I32-4	upregulated	5543659	4.76353	9.42073	0.000435252	0.829507	0.0196365	6857547		chr17:80987016-80987574(-)
ENSMUSG00000048249	-4.34247	A930001N09Rik	I1-2	upregulated	5448820	5.24179	9.89601	0.000788685	0.861834	-0.195125	6849466		chr17:26860438-26860508(+)
ENSMUSG00000015656	-4.37898	Hspa8	E4-11	upregulated	5345250	7.7046	13.6071	0.00325676	0.86253	0.0978433	6988400	bleedingExon|exon-region-exclusion|exon-region-exclusion|retainedIntron	chr9:40612873-40612991(+)
ENSMUSG00000019428	-4.38113	Fkbp8	I3-1	upregulated	5184685	6.58727	11.1303	0.00169845	0.861834	-0.104947	6977012	intron-retention	chr8:73053168-73053280(+)
ENSMUSG00000035653	-4.3839	Lrfn5	E2-1	upregulated	4781146	3.83351	9.99153	0.00498504	0.873601	0.0864267	6795522	cassette-exon	chr12:62705953-62705985(+)
ENSMUSG00000003123	-4.39831	Lipe	E2-1	upregulated	4411632	6.66582	9.07662	0.00314989	0.86253	0.00909167	6965944	alt-N-term	chr7:26180652-26180693(-)
ENSMUSG00000040118	-4.44333	Cacna2d1	I4-3	upregulated	4948374	4.64365	8.32874	0.00399067	0.86253	0.0017525	6928917		chr5:15652772-15653271(+)
ENSMUSG00000020647	-4.44337	Ncoa1	I8-3	upregulated	5337732	6.0937	10.0362	0.000881292	0.861834	0.0154042	6798601		chr12:4320479-4320903(-)
ENSMUSG00000030835	-4.48426	Nomo1	I11-1	upregulated	4821798	6.42321	9.67017	0.000471006	0.840262	0.0643669	6960436		chr7:53309586-53309865(+)
ENSMUSG00000062232	-4.49687	Rapgef2	U0-30	upregulated	4826741	4.34246	9.99714	0.00483754	0.873601	0.039075	6906204		chr3:79036298-79036652(-)
ENSMUSG00000022973	-4.49882	Synj1	E26-1	upregulated	4747751	10.2082	10.2397	0.000903229	0.861834	0.0407857	6847821	cassette-exon	chr16:90949949-90949980(-)
ENSMUSG00000032217	-4.51508	Rnf111	I7-4	upregulated	4671441	7.20614	8.3804	0.00182237	0.861834	0.02746	6996649		chr9:70301644-70301741(-)
ENSMUSG00000000631	-4.51952	Myo18a	E5-7	upregulated	5553894	6.09871	8.84233	0.00183519	0.861834	-0.0357983	6782611		chr11:77593527-77594077(+)
ENSMUSG00000032178	-4.55772	Ilf3	I10-1	upregulated	4376642	3.69421	10.134	0.000446171	0.834926	0.0124639	6987378		chr9:21199198-21199270(+)
ENSMUSG00000017288	-4.55888	Vps53	E2-1	upregulated	5408943	7.99369	9.83268	0.00178955	0.861834	-0.00672222	6789797	alt-C-term	chr11:75990511-75990859(-)
ENSMUSG00000071659	-4.5686	Hnrnpul2	I1-3	upregulated	5072333	6.07063	10.5268	0.00339915	0.86253	-0.0524854	6867966		chr19:8895595-8896049(+)
ENSMUSG00000031433	-4.62601	Rbm41	E9-2	upregulated	4705882	2.89435	8.16305	1.92627e-05	0.789712	-0.150787	7019790	alt-C-term	chrX:136480234-136480275(-)
ENSMUSG00000022883	-4.62867	Robo1	I3-25	upregulated	4342380	5.34136	9.15254	0.00208957	0.861834	0.0409346	6842326		chr16:72790933-72791372(+)
ENSMUSG00000013465	-4.63444	Cobra1	E1-4	upregulated	5240576	4.83588	8.7885	0.00137813	0.861834	0.0512117	6885376	exon-region-exclusion|exon-region-exclusion	chr2:25066077-25066225(-)
ENSMUSG00000063317	-4.67165	Usp31	I1-7	upregulated	4577023	7.84628	10.2842	0.0014896	0.861834	-0.106282	6970994		chr7:128834403-128834864(-)
ENSMUSG00000017485	-4.6724	Top2b	E32-4	upregulated	5235670	4.14608	7.94928	0.00174103	0.861834	0.153421	6817143		chr14:17256374-17256510(+)
ENSMUSG00000038650	-4.67631	Rnh1	I1-2	upregulated	4324500	6.90798	9.40994	0.00134938	0.861834	-0.0099237	6972178		chr7:148357025-148357462(-)
ENSMUSG00000030495	-4.72456	Slc7a10	E2-2	upregulated	4305411	8.44194	11.4591	0.0043739	0.867857	0.141156	6959800	bleedingExon	chr7:35980372-35980455(+)
ENSMUSG00000066643	-4.72836	Wdr35	E10-4	upregulated	5296913	7.59665	9.24834	0.000391725	0.822314	0.117343	6804226	bleedingExon	chr12:8996903-8997177(+)
ENSMUSG00000005089	-4.73127	Slc1a2	I3-10	upregulated	5222577	7.72619	12.9741	0.00366996	0.86253	0.0184456	6879569		chr2:102531327-102531631(+)
ENSMUSG00000049044	-4.73283	Rapgef4	I1-9	upregulated	4986414	4.17162	10.0885	0.000177224	0.789712	-0.276893	6878038		chr2:71863391-71863529(+)
ENSMUSG00000023460	-4.735	Rab12	I4-2	upregulated	4804517	5.25026	10.2394	0.00104083	0.861834	0.0339617	6856744		chr17:66849130-66849307(-)
ENSMUSG00000022801	-4.73814	Lrch3	I1-11	upregulated	4333047	5.9137	10.7247	0.00232649	0.861834	-0.0515867	6840599		chr16:32938916-32939012(+)
ENSMUSG00000047454	-4.74314	Gphn	I13-2	upregulated	5324699	3.86649	10.2388	0.00373411	0.86253	-0.0473978	6796299		chr12:79709162-79709646(+)
ENSMUSG00000001260	-4.77264	Gabrg1	I9-1	upregulated	4386305	5.60864	9.74392	0.00212499	0.861834	-0.0353813	6938999		chr5:71162536-71162829(-)
ENSMUSG00000029512	-4.78542	Ulk1	I5-1	upregulated	4732712	5.75033	9.24046	0.00488006	0.873601	-0.0637558	6941049		chr5:111227755-111227893(-)
ENSMUSG00000034488	-4.79495	Edil3	I3-6	upregulated	5318698	5.80591	12.0759	0.00254677	0.86253	-0.0114717	6808773		chr13:89111368-89111890(+)
ENSMUSG00000024073	-4.82157	Birc6	I27-1	upregulated	4599001	4.45921	9.28674	0.000821907	0.861834	0.149568	6852222		chr17:75011268-75011328(+)
ENSMUSG00000026490	-4.82222	Cdc42bpa	I1-7	upregulated	4734763	5.94076	11.7742	0.00258159	0.86253	0.07119	6755642		chr1:181898966-181899224(+)
ENSMUSG00000046709	-4.85205	Mapk10	I7-1	upregulated	4710126	6.21288	12.0225	0.000541053	0.861834	0.08341	6940535		chr5:103484510-103484913(-)
ENSMUSG00000040481	-4.87399	Bptf	I24-1	upregulated	4420337	5.19489	9.62643	0.00318694	0.86253	0.0538361	6791989		chr11:106914657-106914731(-)
ENSMUSG00000063077	-4.87821	Kif1b	I41-1	upregulated	5043144	4.82868	11.9201	0.00304737	0.86253	-0.03879	6926938		chr4:148565415-148565554(-)
ENSMUSG00000078784	-4.89216	1810022K09Rik	I3-1	upregulated	4795466	8.38114	10.0425	0.00399558	0.86253	0.0456167	6903323		chr3:14606439-14607027(-)
ENSMUSG00000022710	-4.98447	Usp7	I8-1	upregulated	5243753	3.83779	10.6448	0.00094677	0.861834	-0.0745233	6843834		chr16:8710082-8710121(-)
ENSMUSG00000026578	-5.01089	4930455F23Rik	I4-3	upregulated	4625548	5.07397	7.65515	0.00374948	0.86253	-0.0590389	6754700		chr1:166213767-166213988(+)
ENSMUSG00000022619	-5.01667	Mapk8ip2	E12-3	upregulated	5345168	9.98825	11.2639	0.00309596	0.86253	-0.06103	6832585		chr15:89293405-89293962(+)
ENSMUSG00000024921	-5.03107	Smarca2	I25-1	upregulated	5166911	5.44891	11.8508	0.00277936	0.86253	-0.0371325	6868884		chr19:26778651-26778861(+)
ENSMUSG00000070695	-5.03712	Cntnap5a	I6-2	upregulated	4580675	2.4257	8.89809	0.00109322	0.861834	0.0303767	6752381		chr1:118000377-118000509(+)
ENSMUSG00000030302	-5.0477	Atp2b2	I13-1	upregulated	5460638	8.58715	11.7845	0.00359846	0.86253	0.0340478	6956592		chr6:113753458-113753679(-)
ENSMUSG00000029823	-5.10113	Luc7l2	I2-1	upregulated	4730671	5.35811	9.26827	0.00322031	0.86253	0.113878	6945555		chr6:38509068-38509197(+)
ENSMUSG00000026028	-5.10733	Trak2	I9-1	upregulated	5291346	5.93797	10.6023	0.00228658	0.861834	-0.0890458	6758984		chr1:58974528-58974802(-)
ENSMUSG00000055817	-5.14364	Mta3	I4-2	upregulated	5426487	6.29434	11.434	0.00301648	0.86253	-0.032465	6852695		chr17:84140256-84140349(+)
ENSMUSG00000026782	-5.17804	Abi2	I8-1	upregulated	4779548	4.45877	11.8132	0.00256451	0.86253	-0.0916183	6749817		chr1:60507862-60508205(+)
ENSMUSG00000032328	-5.18547	Tmem30a	I5-1	upregulated	4412909	5.85818	11.7984	0.00156538	0.861834	-0.0518406	6997215		chr9:79622496-79622547(-)
ENSMUSG00000035107	-5.22035	Dcbld2	E14-3	upregulated	5161704	4.00418	8.53466	0.00105182	0.861834	-0.0260978	6841849		chr16:58463262-58463319(+)
ENSMUSG00000030120	-5.25268	Mlf2	E8-4	upregulated	5496711	11.0406	11.6412	0.00262453	0.86253	-0.0128062	6949826	exon-region-exclusion|exon-region-exclusion|retainedIntron	chr6:124885468-124885557(+)
ENSMUSG00000039904	-5.25651	Gpr37	I2-1	upregulated	4711599	9.45293	10.7893	0.00128749	0.861834	-0.157351	6952227		chr6:25617803-25618225(-)
ENSMUSG00000025816	-5.26212	Sec61a2	E12-2	upregulated	4357638	6.88656	8.7843	0.000775173	0.861834	-0.117998	6884466		chr2:5794490-5794750(-)
ENSMUSG00000024969	-5.26815	Mark2	I1-7	upregulated	5335044	5.64659	7.08327	0.000131716	0.789712	0.0880917	6871298		chr19:7397129-7397282(-)
ENSMUSG00000049470	-5.27723	Aff4	E2-1	upregulated	5089061	4.04393	11.1626	0.00455723	0.871332	0.0856733	6780963	alt-N-term	chr11:53181160-53181623(+)
ENSMUSG00000019087	-5.32378	Atp6ap1	E10-3	upregulated	4484189	6.59011	11.8718	0.00136211	0.861834	0.14189	7012006	exon-region-exclusion|exon-region-exclusion	chrX:71548990-71549058(+)
ENSMUSG00000033161	-5.32567	Atp1a1	I20-3	upregulated	5266747	6.33838	11.9073	0.00361838	0.86253	-0.05672	6907638		chr3:101383042-101383122(-)
ENSMUSG00000042743	-5.40347	Sgtb	I4-3	upregulated	5556909	5.49715	9.32218	0.00431393	0.86747	0.170261	6809806		chr13:104912881-104913093(+)
ENSMUSG00000026204	-5.503	Ptprn	I6-3	upregulated	4721089	9.43754	10.8598	0.000202844	0.789712	0.01531	6759789	intron-retention	chr1:75254067-75254134(-)
ENSMUSG00000029765	-5.67893	Plxna4	I4-3	upregulated	4649928	4.10465	9.72968	0.00174461	0.861834	0.0827421	6952523		chr6:32257929-32258048(-)
ENSMUSG00000038860	-5.71161	Garnl3	I9-2	upregulated	4652954	6.04602	9.80669	0.00290995	0.86253	0.147395	6885924		chr2:32908318-32908703(-)
ENSMUSG00000020176	-5.7185	Grb10	I6-11	upregulated	5325233	5.46759	9.37563	0.00345539	0.86253	0.0153889	6786046		chr11:11902169-11902195(-)
ENSMUSG00000029088	-5.77577	Kcnip4	I2-19	upregulated	5124833	3.18976	11.4144	0.00387739	0.86253	0.0684733	6937986		chr5:49570709-49570757(-)
ENSMUSG00000025019	-5.81758	Lcor	I6-5	upregulated	4539285	3.94775	9.11221	0.000301634	0.789712	0.10606	6869724		chr19:41613990-41614530(+)
ENSMUSG00000024238	-5.8177	Zeb1	I11-1	upregulated	5528752	4.48865	10.9482	0.0013703	0.861834	-0.159892	6858575		chr18:5768555-5768791(+)
ENSMUSG00000031453	-5.81993	Rasa3	I12-1	upregulated	5112765	4.41463	10.2789	0.000485174	0.857475	0.231025	6980578		chr8:13588212-13588400(-)
ENSMUSG00000006575	-5.94111	Rundc3a	I8-2	upregulated	4727823	5.95735	11.4425	0.000512905	0.861834	-0.066035	6784343		chr11:102262591-102262640(+)
ENSMUSG00000042628	-5.98235	Zfyve1	I3-3	upregulated	5421671	2.49445	9.05434	0.00237609	0.861834	0.0248959	6802265		chr12:84920496-84920524(-)
ENSMUSG00000020546	-6.01494	Stxbp4	E18-2	upregulated	4970918	2.18164	6.45413	0.000296565	0.789712	-0.0252967	6790734	bleedingExon	chr11:90396769-90396793(-)
ENSMUSG00000021301	-6.02374	Hecw1	I1-5	upregulated	4921771	5.72226	10.0638	0.00263532	0.86253	-0.0351065	6811136		chr13:14606633-14607058(-)
ENSMUSG00000040563	-6.0579	BC018242	I5-1	upregulated	4690394	8.13219	9.77148	0.00411402	0.862643	0.014549	6987414		chr9:21745595-21745626(+)
ENSMUSG00000025265	-6.06723	Fgd1	I6-1	upregulated	5259339	5.64087	7.51588	0.00141482	0.861834	0.188349	7014530	intron-retention	chrX:147503657-147504040(+)
ENSMUSG00000060988	-6.07727	Galnt13	I3-8	upregulated	5281676	5.14152	8.52701	0.00226846	0.861834	0.0887019	6877215		chr2:54554115-54554247(+)
ENSMUSG00000029465	-6.11419	Arpc3	E4-1	upregulated	5152671	3.22746	8.64632	0.00193314	0.861834	-0.0307917	6934130	alt-N-term	chr5:122850359-122850431(+)
ENSMUSG00000030795	-6.14786	Fus	I12-1	upregulated	4644490	5.04853	9.49282	0.000182509	0.789712	-1.27914	6964374		chr7:135124853-135124916(+)
ENSMUSG00000050973	-6.15529	D330012F22Rik	E2-2	upregulated	4398197	6.48991	7.23305	0.00179595	0.861834	0.0424567	6961979		chr7:87384221-87384262(+)
ENSMUSG00000025139	-6.23763	Tollip	E9-2	upregulated	4779233	5.18445	10.472	0.00160487	0.861834	0.0141767	6972242	alt-C-term	chr7:149060767-149061008(-)
ENSMUSG00000037369	-6.24055	Kdm6a	I2-7	upregulated	5476375	3.7449	9.10123	0.00105237	0.861834	0.0788718	7010262		chrX:17771308-17771638(+)
ENSMUSG00000021758	-6.25708	Ddx4	E4-1	upregulated	5434036	2.34293	5.05773	0.00233497	0.861834	0.829265	6816130	cassette-exon|cassetteExon	chr13:113431387-113431411(-)
ENSMUSG00000070436	-6.29364	Serpinh1	E6-1	upregulated	4435714	7.54621	7.73251	0.00261957	0.86253	0.00630667	6969713		chr7:106494091-106494442(-)
ENSMUSG00000032046	-6.32318	Abhd12	I3-2	upregulated	5240341	4.97904	10.291	0.00348029	0.86253	0.0119317	6892052		chr2:150677913-150678107(-)
ENSMUSG00000024590	-6.37633	Lmnb1	E5-5	upregulated	4421515	3.6323	7.20427	0.000707335	0.861834	-0.028225	6861145		chr18:56894047-56894077(+)
ENSMUSG00000060373	-6.56142	Hnrnpc	E9-5	upregulated	5250250	4.67904	9.16813	0.00129058	0.861834	0.0296908	6824624		chr14:52693137-52693215(-)
ENSMUSG00000047694	-6.77198	Yipf6	I5-1	upregulated	4505676	3.76105	9.85192	0.00140293	0.861834	-0.101812	7012768		chrX:96135712-96135904(+)
ENSMUSG00000069601	-6.80569	Ank3	E28-2	upregulated	4343341	3.77647	11.2014	0.00201942	0.861834	-0.0442773	6768609		chr10:69388943-69389062(+)
ENSMUSG00000017781	-6.86808	Pitpna	I5-6	upregulated	4523983	3.71387	13.0289	0.00169585	0.861834	0.00990833	6782454		chr11:75421904-75421978(+)
ENSMUSG00000021054	-6.9909	Sgpp1	U0-4	upregulated	5540764	3.40955	10.1209	0.00297309	0.86253	-0.151714	6801838		chr12:76837014-76837399(-)
ENSMUSG00000055116	-7.0667	Arntl	E18-1	upregulated	4836326	5.34415	8.22406	0.000262088	0.789712	0.165987	6963558		chr7:120449550-120449634(+)
ENSMUSG00000018819	-7.19556	Lsp1	E13-1	upregulated	4819187	2.85426	7.49137	0.00101263	0.861834	-0.0954333	6965268		chr7:149675742-149675768(+)
ENSMUSG00000019505	-7.20006	Ubb	I2-1	upregulated	4673277	6.35113	14.0095	0.00416891	0.86322	0.01847	6781579		chr11:62365354-62365464(+)
ENSMUSG00000074826	-7.27941	Gm10767	E4-3	upregulated	4768888	7.27346	6.85767	0.000197771	0.789712	0.322704	6807787		chr13:67009272-67009423(+)
ENSMUSG00000021555	-7.3184	Naa35	I15-2	upregulated	5325280	3.06632	9.09773	0.00192513	0.861834	0.216128	6807518		chr13:59724139-59724224(+)
ENSMUSG00000092012	-7.35337	AC153386.1	E1-2	upregulated	4459331	4.05369	7.06651	0.00376624	0.86253	0.334927	6946177		chr6:50558792-50558816(+)
ENSMUSG00000001260	-7.41696	Gabrg1	E9-1	upregulated	4418671	5.62936	9.74392	0.00421029	0.864477	-0.0353813	6938999	cassette-exon	chr5:71164663-71165055(-)
ENSMUSG00000030527	-7.50969	Crtc3	E7-1	upregulated	4885397	6.84219	8.08093	0.00153523	0.861834	0.582074	6968796		chr7:87754784-87754815(-)
ENSMUSG00000074529	-7.56525	C330013J21Rik	I4-2	upregulated	4790207	2.18498	4.52029	7.18108e-05	0.789712	-0.33051	6894036		chr2:177640692-177640716(-)
ENSMUSG00000066129	-7.57035	Kndc1	I26-1	upregulated	4693439	6.67635	9.54172	5.14356e-05	0.789712	0.281749	6965071		chr7:147121986-147122340(+)
ENSMUSG00000040785	-7.65425	Ttc3	I1-17	upregulated	5266450	6.4735	11.3752	0.00395568	0.86253	0.151793	6843384		chr16:94604644-94604730(+)
ENSMUSG00000030987	-7.74121	Stim1	E1-9	upregulated	4481492	3.90068	9.00887	0.00152794	0.861834	0.163415	6963047		chr7:109419710-109419734(+)
ENSMUSG00000002265	-7.75095	Peg3	E2-3	upregulated	4349791	9.95866	11.4903	0.000680716	0.861834	0.184346	6972750		chr7:6676546-6676895(-)
ENSMUSG00000063873	-7.7811	Slc24a3	I3-19	upregulated	4548182	3.59344	10.1245	0.00277732	0.86253	0.0384833	6881887		chr2:145263833-145264096(+)
ENSMUSG00000022956	-7.87704	Atp5o	I1-49	upregulated	5190971	2.81824	11.7223	0.00428041	0.866285	0.0386011	6847934		chr16:92087021-92087335(-)
ENSMUSG00000005089	-7.87828	Slc1a2	I17-2	upregulated	5272939	5.53354	12.9741	0.0023069	0.861834	0.0184456	6879569		chr2:102595775-102595858(+)
ENSMUSG00000032356	-7.90913	Rasgrf1	I2-1	upregulated	4535438	8.2327	11.289	0.00321991	0.86253	-0.0494759	6991261		chr9:89806436-89806467(+)
ENSMUSG00000040351	-7.91503	Ankib1	I17-2	upregulated	5600156	3.52017	10.4957	0.00394092	0.86253	-0.220104	6935910		chr5:3701996-3702068(-)
ENSMUSG00000032356	-8.03005	Rasgrf1	I2-2	upregulated	5511619	6.94204	11.289	0.000837562	0.861834	-0.0494759	6991261		chr9:89807580-89809838(+)
ENSMUSG00000021390	-8.08491	Ogn	I1-2	upregulated	5569396	4.48547	10.0599	0.00229576	0.861834	-1.00854	6806960		chr13:49704236-49704283(+)
ENSMUSG00000053877	-8.08803	Srcap	I4-1	upregulated	4589810	4.94871	8.82419	0.00379881	0.86253	0.0789144	6964318		chr7:134658825-134658907(+)
ENSMUSG00000022199	-8.14791	Slc22a17	I7-1	upregulated	4592021	8.32389	13.1589	0.00202369	0.861834	-0.0825778	6824779	intron-retention	chr14:55526508-55526696(-)
ENSMUSG00000044308	-8.46528	Ubr3	E8-4	upregulated	4950109	3.67279	9.22898	0.0045066	0.871153	-0.0692133	6877940	bleedingExon	chr2:69776370-69776458(+)
ENSMUSG00000038664	-8.52964	Herc1	E3-3	upregulated	5220582	3.52282	9.29726	0.00341082	0.86253	0.117497	6990027		chr9:66223513-66223745(+)
ENSMUSG00000015656	-8.57304	Hspa8	E4-3	upregulated	5444954	7.86986	13.6071	0.00342121	0.86253	0.0978433	6988400	bleedingExon|exon-region-exclusion|exon-region-exclusion|retainedIntron	chr9:40611650-40611801(+)
ENSMUSG00000025892	-8.59103	Gria4	I6-1	upregulated	4639897	2.97864	10.2891	0.00198789	0.861834	0.0916167	6993204		chr9:4537357-4537628(-)
ENSMUSG00000002052	-8.72094	Supt6h	I29-3	upregulated	4998678	4.20685	9.73787	0.000207149	0.789712	0.074449	6789951		chr11:78029341-78029366(-)
ENSMUSG00000043059	-8.89234	Zfp513	E3-9	upregulated	4516940	1.74779	8.09432	0.0025525	0.86253	0.133468	6937072	bleedingExon	chr5:31501378-31501403(-)
ENSMUSG00000033577	-9.0788	Myo6	I35-1	upregulated	5523501	5.04281	10.275	0.00138456	0.861834	-0.0594737	6990774		chr9:80148487-80148540(+)
ENSMUSG00000021190	-9.3766	Lgmn	U0-4	upregulated	5114004	3.90557	11.5406	0.00229376	0.861834	0.0714842	6803161		chr12:103683539-103684108(-)
ENSMUSG00000010064	-9.51834	Slc38a3	E12-1	upregulated	5280516	4.30701	11.3979	1.53821e-05	0.789712	0.0285133	6998643	alt-3'|alt-5'	chr9:107558017-107558140(-)
ENSMUSG00000040907	-9.89896	Atp1a3	E22-4	upregulated	4399944	6.17706	12.9215	0.000200041	0.789712	0.112717	6965901	bleedingExon|exon-region-exclusion|exon-region-exclusion|retainedIntron	chr7:25763610-25763714(-)
ENSMUSG00000048677	-9.9574	Tpcn2	I26-8	upregulated	5063254	3.17056	7.6429	0.00141048	0.861834	0.210623	6972501		chr7:152434012-152434038(-)
ENSMUSG00000000743	-10.1498	Chmp1a	I1-1	upregulated	5410367	1.74105	10.8433	0.00057444	0.861834	-0.0641333	6985983		chr8:125735587-125735616(-)
ENSMUSG00000042744	-10.5779	Gm15800	I1-3	upregulated	5127423	4.94691	10.0675	0.00248699	0.861834	0.054411	6934019		chr5:121673241-121673299(+)
ENSMUSG00000009090	-10.7129	Ap1b1	I14-1	upregulated	5166029	3.99282	10.2292	0.00366782	0.86253	0.00694133	6778425		chr11:4931913-4932132(+)
ENSMUSG00000018707	-11.0862	Dync1h1	I42-2	upregulated	4338094	5.02513	11.6706	0.00223699	0.861834	-0.0155117	6798108		chr12:111883572-111883825(+)
ENSMUSG00000022023	-11.2338	Wbp4	E11-6	upregulated	5513295	2.58877	7.44039	0.00413546	0.862643	0.187331	6826279		chr14:79860688-79860720(-)
ENSMUSG00000030744	-12.1909	Rps3	E4-1	upregulated	5487547	6.51423	10.9055	0.0015072	0.861834	-0.043525	6969735	alt-5'|bleedingExon	chr7:106628402-106628434(-)
ENSMUSG00000059031	-13.129	Olfr482	U1-5	upregulated	4933075	7.17383	4.91455	0.00270922	0.86253	-0.304373	6970302		chr7:115237460-115237611(-)
ENSMUSG00000054455	-13.7777	Vapb	E7-9	upregulated	4748748	2.06536	9.96978	0.00108193	0.861834	0.05129	6883694		chr2:173609792-173609816(+)
ENSMUSG00000038187	-14.5972	Btbd10	E7-2	upregulated	5078099	5.87551	8.83515	0.000320688	0.800294	0.62232	6970568		chr7:120476234-120476261(-)
