# Supplementary material for: FUS/TLS deficiency causes behavioral and pathological abnormalities distinct from amyotrophic lateral sclerosis
Source: Acta Neuropathol Commun. 2015 Apr 25;3:24. doi: 10.1186/s40478-015-0202-6 (PMC4408580; doi:10.1186/s40478-015-0202-6)
Supplement: Additional file 5: Table S4. — Transcriptome changes found in both this study and Lagier-Tourenne et al. [file 40478_2015_202_MOESM5_ESM.xls]

## Sheet: Table S4
Table S4	Transcriptome changes found in both this study and Lagier-Tourenne et al.
	Gene expression changes detected in this study and Lagier-Tourenne et al.
ExonArray (This study)											RNA-seq (Lagier-Tourenne et al.)
Ensembl_gene	Symbol	Definition	Chromosome	Strand	Genomic Gene Corrdinates	avg-KO	avg-WT	log_fold change	fold change	raw p-value	RPKM in FUS/TLS KD	RPKM in control	Ratio KD/control	Z score
ENSMUSG00000030795	Fus	fusion, derived from t(12;16) malignant liposarcoma (human) Gene	chr7	+	135111005-135125686	8.11149	9.46337	-1.35188	-2.55244	0.000999965	8.611	102.974	0.08	-18.226
ENSMUSG00000038569	Rad9b	RAD9 homolog B (S. cerevisiae) Gene	chr5	-	122775010-122804184	5.19299	6.30805	-1.11505	-2.16603	0.00321571	0.651	1.322	0.49	-2.054
ENSMUSG00000032586	Traip	TRAF-interacting protein Gene	chr9	+	107853112-107874359	7.14932	8.01046	-0.861147	-1.81648	0.0216718	3.131	6.322	0.5	-4.787
ENSMUSG00000035126	Wdr78	WD repeat domain 78 Gene	chr4	-	102711912-102787138	6.47176	7.22512	-0.753365	-1.68572	0.00381028	1.534	2.873	0.53	-3.284
ENSMUSG00000000530	Acvrl1	activin A receptor, type II-like 1 Gene	chr15	+	100952606-100975480	9.39686	10.0859	-0.689041	-1.61221	0.000856562	5.875	7.672	0.77	-2.007
ENSMUSG00000069917	Hba-a2	hemoglobin alpha, adult chain 2 Gene	chr11	+	32196527-32197253	10.9279	11.5628	-0.634911	-1.55284	0.0321555	1.037	2.55	0.41	-4.278
ENSMUSG00000078490	C030017K20Rik	RIKEN cDNA C030017K20 gene Gene	chr4	+	154825794-154840924	6.57959	7.126	-0.546404	-1.46044	0.0470998	0.536	2.115	0.25	-4.966
ENSMUSG00000049252	Lrp1b	low density lipoprotein-related protein 1B (deleted in tumors) Gene	chr2	-	40453935-42508218	8.85659	9.36763	-0.511038	-1.42508	0.00582231	2.861	5.09	0.56	-3.556
ENSMUSG00000087408	Lass1	LAG1 homolog, ceramide synthase 1 Gene	chr8	+	72839709-72853713	9.89995	10.3961	-0.496178	-1.41047	0.0195971	19.517	23.879	0.82	-1.965
ENSMUSG00000027010	Slc25a12	solute carrier family 25 (mitochondrial carrier, Aralar), member 12 Gene	chr2	-	71112413-71205995	11.2561	11.7221	-0.465932	-1.38121	0.000225687	19.447	25.573	0.76	-2.677
ENSMUSG00000026017	Carf	calcium response factor Gene	chr1	+	60096440-60208059	7.93221	8.36641	-0.434204	-1.35117	0.0281116	2.834	4.242	0.67	-2.161
ENSMUSG00000032565	Nudt16	nudix (nucleoside diphosphate linked moiety X)-type motif 16 Gene	chr9	-	105031253-105034135	7.30431	7.72178	-0.417463	-1.33558	0.00109261	2.438	3.928	0.62	-2.57
ENSMUSG00000064125	BC068157	cDNA sequence BC068157 Gene	chr8	-	4209974-4223499	7.61706	8.02124	-0.404179	-1.32334	0.0443558	4.77	6.364	0.75	-2.014
ENSMUSG00000041771	Slc24a4	solute carrier family 24 (sodium/potassium/calcium exchanger), member 4 Gene	chr12	+	103367201-103505590	9.71301	10.1035	-0.390503	-1.31085	0.0410498	9.287	13.328	0.7	-3.131
ENSMUSG00000060988	Galnt13	UDP-N-acetyl-alpha-D-galactosamine:polypeptide N-acetylgalactosaminyltransferase 13 Gene	chr2	+	54288810-54970261	9.61235	9.9984	-0.386047	-1.30681	0.00633475	10.325	13.089	0.79	-2.032
ENSMUSG00000062151	Unc13c	unc-13 homolog C (C. elegans) Gene	chr9	-	73330561-73762698	10.435	10.8087	-0.37371	-1.29568	0.0485822	17.377	23.971	0.72	-3.102
ENSMUSG00000055067	Smyd3	SET and MYND domain containing 3 Gene	chr1	-	180885297-181448160	9.09427	9.45195	-0.35768	-1.28136	0.00435711	1.692	5.718	0.3	-7.237
ENSMUSG00000049176	Frmpd4	FERM and PDZ domain containing 4 Gene	chrX	-	163898325-165007131	9.22298	9.57708	-0.354103	-1.27819	0.0419445	9.907	14.524	0.68	-3.374
ENSMUSG00000031932	Gpr83	G protein-coupled receptor 83 Gene	chr9	+	14664635-14675017	10.1401	10.4876	-0.347549	-1.2724	0.000238821	8.747	11.489	0.76	-2.358
ENSMUSG00000029165	Agbl5	ATP/GTP binding protein-like 5 Gene	chr5	+	31191129-31209318	8.21488	8.5579	-0.343019	-1.26841	0.0181133	3.699	5.168	0.72	-2.195
ENSMUSG00000039087	Rreb1	ras responsive element binding protein 1 Gene	chr13	+	37804920-38043851	8.38129	8.71834	-0.337044	-1.26317	0.0147341	7.171	9.394	0.76	-2.23
ENSMUSG00000063887	Nlgn1	neuroligin 1 Gene	chr3	-	25334853-26215713	11.3505	11.6352	-0.284667	-1.21813	0.00270889	9.161	11.848	0.77	-2.197
ENSMUSG00000086844	B230206H07Rik	RIKEN cDNA B230206H07 gene Gene	chr7	-	148545176-148550999	5.64229	5.92416	-0.281868	-1.21577	0.00341008	1.348	2.875	0.47	-3.972
ENSMUSG00000026172	Bcs1l	BCS1-like (yeast) Gene	chr1	+	74634135-74639245	9.0365	9.31167	-0.275171	-1.21014	0.000295085	4.154	5.72	0.73	-2.144
ENSMUSG00000030621	Me3	malic enzyme 3, NADP(+)-dependent, mitochondrial Gene	chr7	+	96774593-97005027	10.232	10.5068	-0.274803	-1.20983	0.0155826	4.685	6.593	0.71	-2.426
ENSMUSG00000040557	Wbscr27	Williams Beuren syndrome chromosome region 27 (human) Gene	chr5	+	135395007-135418473	6.53674	6.80565	-0.268912	-1.2049	0.0089424	2.039	3.098	0.66	-2.233
ENSMUSG00000018470	Kcnab3	potassium voltage-gated channel, shaker-related subfamily, beta member 3 Gene	chr11	+	69139762-69146427	8.5416	8.24093	0.300677	1.23172	0.027818	13.377	7.571	1.77	5.191
ENSMUSG00000036138	Acaa1a	acetyl-Coenzyme A acyltransferase 1A Gene	chr9	+	119248849-119259410	8.19041	7.88507	0.305337	1.23571	0.00641118	5.772	4.022	1.44	2.916
ENSMUSG00000044847	Lsm11	U7 snRNP-specific Sm-like protein LSM11 Gene	chr11	-	45741882-45758443	6.8641	6.529	0.335098	1.26146	0.0292918	7.283	4.973	1.46	3.129
ENSMUSG00000024981	Acsl5	acyl-CoA synthetase long-chain family member 5 Gene	chr19	+	55326356-55372150	8.04467	7.67383	0.370835	1.2931	0.0194264	9.41	6.835	1.38	2.963
ENSMUSG00000020680	Taf15	TAF15 RNA polymerase II, TATA box binding protein (TBP)-associated factor Gene	chr11	+	83286623-83322391	10.8476	10.4563	0.391294	1.31157	0.00962291	40.266	26.043	1.55	3.127
ENSMUSG00000028041	Adam15	a disintegrin and metallopeptidase domain 15 (metargidin) Gene	chr3	-	89142956-89153788	9.71369	9.26305	0.450643	1.36665	0.00185342	16.065	12.868	1.25	2.147
ENSMUSG00000029822	Osbpl3	oxysterol binding protein-like 3 Gene	chr6	-	50249356-50402732	8.50336	7.75494	0.748416	1.67995	0.040393	3.991	2.776	1.44	2.416
ENSMUSG00000035910	Dcdc2a	doublecortin domain containing 2a Gene	chr13	+	25145041-25302532	6.76197	5.98762	0.774353	1.71042	0.00643258	1.782	1.205	1.48	2.086
	Alternaive RNA processing detected in this study and Lagier-Tourenne et al.
ExonArray (This study)								Lagier-Tourenne et al.
Ensembl	FIRMA_fold	description	symbol	exons	regulation_call	raw p-value	probeset location	location	start	end	Type of event
ENSMUSG00000020524	-6.6122	glutamate receptor, ionotropic, AMPA1 (alpha 1) Gene	Gria1	E17-1	upregulated	0.00160124	chr11:57124199-57124224(+)	chr11	57102997	57131167	mutually_exc
ENSMUSG00000060450	-5.31798	ring finger protein 14 Gene	Rnf14	E3-1	upregulated	0.000606193	chr18:38457157-38457228(+)	chr18	38456452	38459407	alt_cassette
ENSMUSG00000032503	-5.23972	cyclic AMP-regulated phosphoprotein, 21 Gene	Arpp21	E12-1	upregulated	0.0188053	chr9:112089975-112090010(-)	chr9	112088273	112090093	alt_cassette
ENSMUSG00000060450	-4.6224	ring finger protein 14 Gene	Rnf14	I3-3	upregulated	0.00350973	chr18:38458010-38458044(+)	chr18	38456452	38459407	alt_cassette
ENSMUSG00000078784	-4.17198	RIKEN cDNA 1810022K09 gene Gene	1810022K09Rik	I3-1	upregulated	0.00355097	chr3:14606439-14607027(-)	chr3	14606408	14607176	retained_int
ENSMUSG00000024091	-4.06961	vesicle-associated membrane protein, associated protein A Gene	Vapa	I4-4	upregulated	0.0124077	chr17:65936399-65936492(-)	chr17	65932073	65941651	alt_cassette
ENSMUSG00000058756	-3.94503	thyroid hormone receptor alpha Gene	Thra	E16-2	upregulated	0.0103598	chr11:98625725-98625839(+)	chr11	98625699	98629491	complex
ENSMUSG00000029422	-3.89319	arginine/serine-rich coiled-coil 2 Gene	Rsrc2	E2-1	upregulated	0.00310713	chr5:124196799-124196870(-)	chr5	124195598	124199297	alt_cassette
ENSMUSG00000017801	-3.826	MAX-like protein X Gene	Mlx	I1-2	upregulated	0.00835175	chr11:100949028-100949053(+)	chr11	100948681	100949067	alt_5
ENSMUSG00000023960	-3.56022	ectonucleotide pyrophosphatase/phosphodiesterase 5 Gene	Enpp5	I3-2	upregulated	0.000770174	chr17:44220761-44221957(+)	chr17	44219869	44222153	retained_int
ENSMUSG00000022822	-3.38529	ATP-binding cassette, sub-family C (CFTR/MRP), member 5 Gene	Abcc5	E7-2	upregulated	0.00670452	chr16:20402334-20402371(-)	chr16	20332331	20404638	alt_end
ENSMUSG00000004892	-3.28593	brevican Gene	Bcan	I8-1	upregulated	0.00125858	chr3:87796779-87796919(-)	chr3	87791452	87796976	alt_end
ENSMUSG00000029823	-3.26199	LUC7-like 2 (S. cerevisiae) Gene	Luc7l2	E3-1	upregulated	0.006182	chr6:38509206-38509289(+)	chr6	38501518	38520509	complex
ENSMUSG00000024302	-3.21448	dystrobrevin alpha Gene	Dtna	I5-11	upregulated	0.0203749	chr18:23691423-23691787(+)	chr18	23633743	23693662	alt_cassette
ENSMUSG00000058756	-3.13227	thyroid hormone receptor alpha Gene	Thra	E16-4	upregulated	0.00817714	chr11:98627889-98627960(+)	chr11	98625699	98629491	complex
ENSMUSG00000022822	-2.94025	ATP-binding cassette, sub-family C (CFTR/MRP), member 5 Gene	Abcc5	E7-1	upregulated	0.00689717	chr16:20402372-20402403(-)	chr16	20332331	20404638	alt_end
ENSMUSG00000010086	-2.89901	ring finger protein 112 Gene	Rnf112	E9-2	upregulated	0.00508014	chr11:61264408-61264476(-)	chr11	61264404	61264479	retained_int
ENSMUSG00000023960	-2.76769	ectonucleotide pyrophosphatase/phosphodiesterase 5 Gene	Enpp5	I3-1	upregulated	0.000851922	chr17:44219902-44220441(+)	chr17	44219869	44222153	retained_int
ENSMUSG00000071454	-2.6685	dystrobrevin, beta Gene	Dtnb	E20-1	upregulated	0.0103562	chr12:3773551-3773579(+)	chr12	3772726	3779639	complex
ENSMUSG00000029823	-2.65888	LUC7-like 2 (S. cerevisiae) Gene	Luc7l2	E4-2	upregulated	0.00245728	chr6:38515656-38515721(+)	chr6	38501518	38520509	complex
ENSMUSG00000071454	-2.5839	dystrobrevin, beta Gene	Dtnb	I20-3	upregulated	0.0109882	chr12:3773864-3773892(+)	chr12	3772726	3779639	complex
ENSMUSG00000022822	-2.5801	ATP-binding cassette, sub-family C (CFTR/MRP), member 5 Gene	Abcc5	I7-1	upregulated	0.00205303	chr16:20401295-20402132(-)	chr16	20332331	20404638	alt_end
ENSMUSG00000058756	-2.22691	thyroid hormone receptor alpha Gene	Thra	E16-3	upregulated	0.0133942	chr11:98626136-98626780(+)	chr11	98625699	98629491	complex
ENSMUSG00000031221	-2.1683	immunoglobulin (CD79A) binding protein 1 Gene	Igbp1	E2-5	upregulated	0.00301009	chrX:97694425-97694607(+)	chrX	97690537	97711340	alt_end
ENSMUSG00000022822	-2.04368	ATP-binding cassette, sub-family C (CFTR/MRP), member 5 Gene	Abcc5	I6-1	upregulated	0.0014833	chr16:20403274-20404600(-)	chr16	20332331	20404638	alt_end
ENSMUSG00000058756	-1.9807	thyroid hormone receptor alpha Gene	Thra	E16-5	upregulated	0.0169476	chr11:98628252-98628795(+)	chr11	98625699	98629491	complex
ENSMUSG00000002732	-1.92293	FK506 binding protein 7 Gene	Fkbp7	E5-1	upregulated	0.0433447	chr2:76501268-76501365(-)	chr2	76501101	76509753	alt_end
ENSMUSG00000035024	-1.68302	non-SMC condensin II complex, subunit D3 Gene	Ncapd3	E26-1	upregulated	0.00430474	chr9:26881433-26882049(+)	chr9	26837759	26889990	alt_start
ENSMUSG00000028057	-1.63374	Ras-like without CAAX 1 Gene	Rit1	E2-3	upregulated	0.0385046	chr3:88521394-88521492(+)	chr3	88521392	88521523	alt_3
ENSMUSG00000029823	-1.62572	LUC7-like 2 (S. cerevisiae) Gene	Luc7l2	E2-8	upregulated	0.000889228	chr6:38507881-38508001(+)	chr6	38501518	38520509	complex
ENSMUSG00000031221	-1.51481	immunoglobulin (CD79A) binding protein 1 Gene	Igbp1	E2-3	upregulated	0.0212189	chrX:97692312-97692403(+)	chrX	97690537	97711340	alt_end
ENSMUSG00000071337	-1.26929	cytotoxic granule-associated RNA binding protein 1 Gene	Tia1	E6-3	upregulated	0.0186356	chr6:86369551-86369757(+)	chr6	86368926	86370317	alt_cassette
ENSMUSG00000031169	-1.25347	porcupine homolog (Drosophila) Gene	Porcn	E4-1	upregulated	0.0070704	chrX:7780918-7780956(-)	chrX	7780941	7782711	alt_cassette
ENSMUSG00000022197	1.31252	PDZ domain containing 2 Gene	Pdzd2	E6-2	downregulated	0.00248399	chr15:12478841-12478950(-)	chr15	12388054	12478990	alt_cassette
ENSMUSG00000022822	1.31403	ATP-binding cassette, sub-family C (CFTR/MRP), member 5 Gene	Abcc5	E19-1	downregulated	0.00715173	chr16:20375088-20375205(-)	chr16	20332331	20404638	alt_end
ENSMUSG00000022822	1.35128	ATP-binding cassette, sub-family C (CFTR/MRP), member 5 Gene	Abcc5	E26-1	downregulated	0.00717156	chr16:20364049-20364194(-)	chr16	20332331	20404638	alt_end
ENSMUSG00000022822	1.61624	ATP-binding cassette, sub-family C (CFTR/MRP), member 5 Gene	Abcc5	E9-2	downregulated	0.0202288	chr16:20399983-20400100(-)	chr16	20332331	20404638	alt_end
ENSMUSG00000022829	1.62565	syntaxin binding protein 5-like Gene	Stxbp5l	E24-1	downregulated	0.00248026	chr16:37142394-37142515(-)	chr16	37140169	37174382	alt_cassette
ENSMUSG00000022822	1.71105	ATP-binding cassette, sub-family C (CFTR/MRP), member 5 Gene	Abcc5	E24-1	downregulated	0.00150068	chr16:20365920-20366030(-)	chr16	20332331	20404638	alt_end
ENSMUSG00000003518	1.87574	dual specificity phosphatase 3 (vaccinia virus phosphatase VH1-related) Gene	Dusp3	I3-2	downregulated	0.0379231	chr11:101845117-101845253(-)	chr11	101836253	101845926	alt_cassette
ENSMUSG00000061080	1.92413	limbic system-associated membrane protein Gene	Lsamp	I1-181	downregulated	0.00962472	chr16:40765233-40765636(+)	chr16	39984483	41533565	alt_start
ENSMUSG00000022822	1.93726	ATP-binding cassette, sub-family C (CFTR/MRP), member 5 Gene	Abcc5	E31-1	downregulated	0.0181736	chr16:20335179-20335292(-)	chr16	20332331	20404638	alt_end
ENSMUSG00000022822	2.12581	ATP-binding cassette, sub-family C (CFTR/MRP), member 5 Gene	Abcc5	E25-1	downregulated	0.0131501	chr16:20365727-20365806(-)	chr16	20332331	20404638	alt_end
ENSMUSG00000021493	2.57096	PDZ and LIM domain 7 Gene	Pdlim7	E11-2	downregulated	0.00171852	chr13:55607307-55607331(-)	chr13	55599935	55608690	alt_end
ENSMUSG00000024109	2.68986	neurexin I Gene	Nrxn1	I10-7	downregulated	0.025699	chr17:91071040-91071322(-)	chr17	91022759	91100083	retained_int
ENSMUSG00000058756	2.74374	thyroid hormone receptor alpha Gene	Thra	E17-1	downregulated	0.00125808	chr11:98629477-98629586(+)	chr11	98625699	98629491	complex
ENSMUSG00000022340	2.81132	syntabulin (syntaxin-interacting) Gene	Sybu	E3-1	downregulated	0.000322756	chr15:44583864-44583994(-)	chr15	44550531	44619134	alt_cassette
ENSMUSG00000004892	2.86393	brevican Gene	Bcan	E13-1	downregulated	0.00271478	chr3:87792280-87792355(-)	chr3	87791452	87796976	alt_end
ENSMUSG00000004892	3.26687	brevican Gene	Bcan	E11-1	downregulated	0.0100229	chr3:87793097-87793171(-)	chr3	87791452	87796976	alt_end
ENSMUSG00000004892	3.37692	brevican Gene	Bcan	E12-1	downregulated	0.00216425	chr3:87792636-87792696(-)	chr3	87791452	87796976	alt_end
ENSMUSG00000026270	3.75238	calpain 10 Gene	Capn10	E11-3	downregulated	0.00806793	chr1:94843514-94843549(+)	chr1	94837077	94844525	alt_end
ENSMUSG00000036902	4.15178	neuropilin (NRP) and tolloid (TLL)-like 2 Gene	Neto2	E2-1	downregulated	0.0124922	chr8:88214735-88214794(-)	chr8	88198029	88224823	alt_start
ENSMUSG00000052917	4.19999	SUMO1/sentrin specific peptidase 7 Gene	Senp7	I6-2	downregulated	0.0172581	chr16:56118886-56118982(+)	chr16	56097544	56123892	alt_cassette
ENSMUSG00000020524	4.23572	glutamate receptor, ionotropic, AMPA1 (alpha 1) Gene	Gria1	E16-1	downregulated	0.0332973	chr11:57123290-57123320(+)	chr11	57102997	57131167	mutually_exc
ENSMUSG00000061601	5.19077	piccolo (presynaptic cytomatrix protein) Gene	Pclo	E7-1	downregulated	0.00615541	chr5:14718818-14718844(+)	chr5	14714598	14718856	alt_3
ENSMUSG00000059456	7.80567	PTK2 protein tyrosine kinase 2 beta Gene	Ptk2b	E24-3	downregulated	0.00252076	chr14:66781865-66781961(-)	chr14	66777514	66784100	alt_cassette
